# Supplementary material for: Azaylide-based gemini amphiphiles displaying unique self-assembling behavior via an even–odd effect of alkyl linker chain length
Source: Royal Society of Chemistry journal article supplement (doi:10.1039/d4sm00789a), 2024-01-01

## **Supporting Information for**

### **Azaylide-based Gemini Amphiphiles Displaying Unique Self-Assembling Behavior via Even–Odd Effect of Alkyl Linker Chain Length**

Yoshimori Akiyama, Masahiro Yamashina,\* and Shinji Toyota\*

Department of Chemistry, School of Science, Tokyo Institute of Technology, 2-12-1  
Ookayama, Meguro-ku, Tokyo 152-8551, Japan.

|                                                                |     |
|----------------------------------------------------------------|-----|
| <b>1. General</b>                                              | S3  |
| <b>2. Synthesis</b>                                            | S6  |
| 2.1. Preparation of <b>NdpPn</b> via the Staudinger reaction   | S6  |
| 2.2. Preparation of <b>NPPh2Me</b> via the Staudinger reaction | S10 |
| <b>3. X-ray crystallography</b>                                | S11 |
| <b>4. UV-vis and fluorescence spectra of NdpP3</b>             | S13 |
| <b>5. Stability in water</b>                                   | S14 |
| <b>6. Formation of assemblies</b>                              | S16 |
| 6.1. Preparation of assemblies                                 | S16 |
| 6.2. <sup>1</sup> H DOSY spectra                               | S24 |
| 6.3. DLS measurements                                          | S25 |
| 6.4. Optimized structures                                      | S26 |
| 6.5. Determination of CMC                                      | S27 |
| 6.6. PXRD analyses                                             | S29 |
| 6.7. AFM and TEM images                                        | S30 |
| <b>7. Host-guest chemistry</b>                                 | S31 |
| 7.1. Encapsulation of hydrophobic organic molecules            | S31 |
| 7.2. UV-vis and fluorescence spectra                           | S32 |
| 7.3. DLS measurements                                          | S34 |
| 7.4. Evaluation of uptake quantity                             | S36 |
| 7.5. Optimized structures                                      | S38 |
| <b>8. NMR and MS spectra</b>                                   | S39 |

## 1. General

All reagents and solvents were purchased from commercial sources and used as received. NMR spectra were recorded using a JEOL 500 MHz JNM-ECX500 spectrometer, a 500 MHz JNM-ECZ500 spectrometer, a Bruker 600 MHz Avance III HD Smart Probe NMR spectrometer. Chemical shifts for  $^1\text{H}$ ,  $^{13}\text{C}$ , and  $^{31}\text{P}$  are reported in ppm on the  $\delta$  scale;  $^1\text{H}$  and  $^{13}\text{C}$  signals were referenced to the residual solvent peak, and  $^{31}\text{P}$  was referenced to an external standard of 85%  $\text{H}_3\text{PO}_4$  in  $\text{D}_2\text{O}$  at 0.00 ppm. Electrospray ionization time-of-flight (ESI-TOF) was performed on a Bruker micrOTOF II mass Spectrometer. Fourier transform infrared (FT-IR) spectra were measured by a JASCO FT/IR 4100. Single crystal X-ray crystallography was carried out with a Rigaku XtaLAB Synergy R/DW HyPix diffractometer with multi-layer mirror monochromated Cu  $\text{K}\alpha$  radiation ( $\lambda = 1.54184 \text{ \AA}$ ) and processed on a CrysAlisPro 1.171 (Rigaku Oxford Diffraction, 2018), and a diffractometer equipped in a beamline PF-BL5a at the High Energy Accelerator Research Organization (KEK), Japan with a Pilatus3 S6M detector (synchrotron,  $\lambda = 0.7500 \text{ \AA}$ ) and processed on an XDS ver 2022.01.10<sup>S1</sup>. The structure was solved by intrinsic phasing methods using SHELXT-2018<sup>S2</sup> and then refined with SHELXL-2016<sup>S3</sup> using the Olex2.1.5<sup>S4</sup> as graphical user interfaces. Since some of solvent molecules were significantly disordered, the solvent mask was performed for the refinement. Powder X-ray diffraction data were collected for samples on a Rigaku MiniFlex600. Elemental analyses were performed on a Perkin-Elmer 2400 instrument. UV-visible absorption spectroscopy was performed using a JASCO V-730 UV-Vis-NIR spectrophotometer. Samples were analyzed using quartz cuvettes with optical path lengths of 2.0 mm. Fluorescence spectroscopy was performed using a JASCO FP-8550 spectrofluorometer. Samples were analyzed at room temperature using quartz cuvettes with optical path lengths of 2.0 mm. Molecular mechanics calculation was conducted by Materials Studio program (version 5.5.3, BIOVIA, USA) with the UFF force field. The MM calculation was performed without  $\text{Cl}^-$  ions, and a point charge was assigned to the nitrogen atom in the trimethylammonium group. The optimized structure of micelles was calculated from an initial state, where multiple amphiphilic molecules were arranged spherically so that the averaged distance between carbonyl groups on the hydrophilic part closely matched the value estimated by DLS analysis. DLS spectra were recorded by a Wyatt Technology DynaPro NanoStar with Nano Disp Microcuvettes at 298 K. AFM images were obtained using an Oxford Instruments Cypher S. TEM images were obtained using a HITACHI H-

7650 type zero A. TEM samples were stained by a Nissin-EM EM stainer or a Nanoprobes inc. Nano-W.

## References

- [S1]. W. Kabsch *Acta Cryst.* 2010, **D66**, 125–132.
- [S2]. G. M. Sheldrick *Acta Cryst.* 2015, **A71**, 3–8.
- [S3]. G. M. Sheldrick *Acta Cryst.* 2015, **C71**, 3–8
- [S4]. O. V. Dolomanov, L. J. Bourhis, R. J. Gildea, J. A. K. Howard and H. Puschmann *J. Appl. Cryst.* 2009, **42**, 339–341.



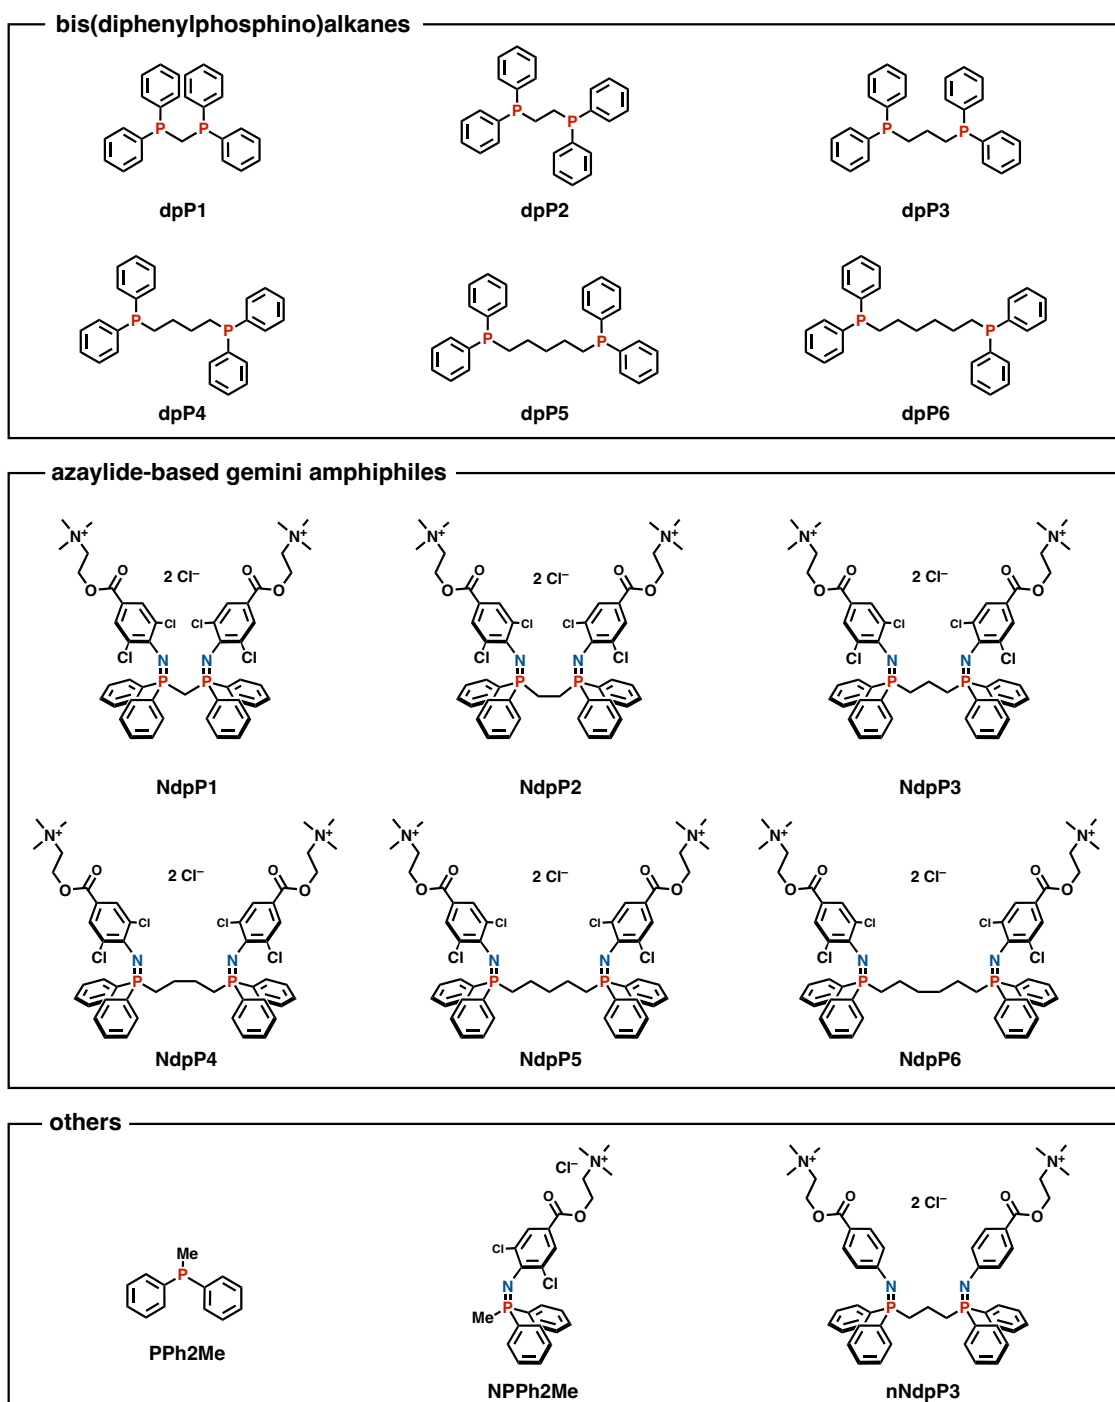

**Figure S1.** Chemical structures of bis(diphenylphosphino)alkanes, corresponding azaylide-based gemini amphiphiles, and related compounds used in this study.

## 2. Synthesis

### 2.1. Preparation of NdpPn via the Staudinger reaction

YA1-168

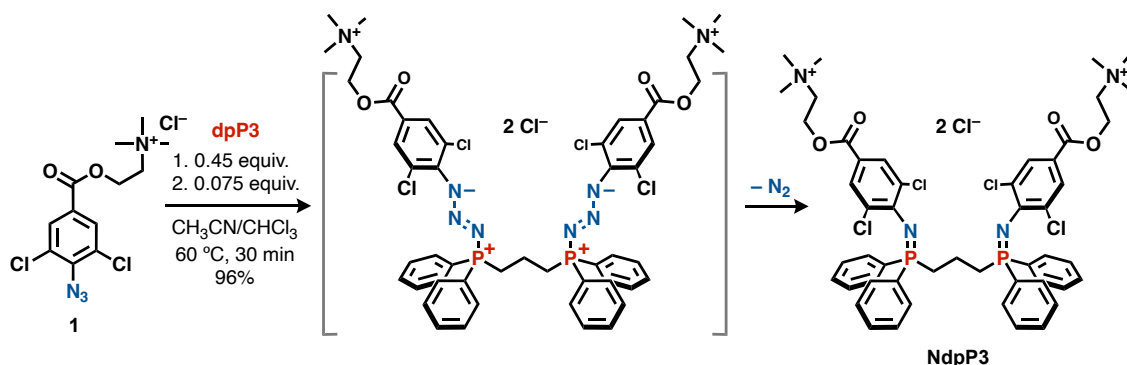

A CH<sub>3</sub>CN solution (7.0 mL) of hydrophilic azide **1** (49.3 mg, 0.139 mmol) and 1,3-bis(diphenylphosphino)propane (**dpP3**; 26.0 mg, 0.0630 mmol, 0.45 equiv.) was added to a 25 mL glass flask, and the mixture was stirred at 60 °C for 10 min. After the solution color changed from bright yellow to colorless, a CHCl<sub>3</sub> solution (3.0 mL) of **dpP3** (4.2 mg, 0.0102 mmol, 0.075 equiv.) was added dropwise over 10 min. After stirring for 10 min, the solvent was removed under reduced pressure. The obtained solid was purified by reprecipitation (CH<sub>3</sub>CN/Et<sub>2</sub>O) and washed with hexane to afford **NdpP3** as a hygroscopic off-white solid (71.4 mg, 96%). Azaylide-based amphiphiles **NdpP5**, and **NdpP6** were synthesized from **dpP5** (91%) and **dpP6** (92%), respectively, in the same manner as **dpP3**.

**NdpP2** and **NdpP4** were synthesized from **dpP2** (98%) and **dpP4** (93%), respectively. Obtained precipitates were washed with hexane. Due to the proximity of two phosphine sites, **NdpP1** was synthesized from **dpP1** (87%) under conditions at 80 °C for 1 h stirring time, employing higher concentration (113 mM). Non-chlorinated azaylide **nNdpP3** was also prepared using non-chlorinated **1'** (83%) in the same manner as **NdpP3**.

for **NdpP3**

$^1\text{H}$  NMR (500 MHz, DMSO- $d_6$ , 298 K):  $\delta$  7.74 (dd,  $J_{\text{H-H}} = 7.4$  Hz,  $J_{\text{H-P}} = 11.9$  Hz, 8H), 7.72 (d,  $J_{\text{H-P}} = 1.1$  Hz, 4H), 7.53 (td,  $J_{\text{H-H}} = 7.4$  Hz,  $J_{\text{H-P}} = 1.1$  Hz, 4H), 7.46 (td,  $J_{\text{H-H}} = 7.4$  Hz,  $J_{\text{H-P}} = 2.8$  Hz, 8H), 4.66 (br, 4H), 3.86 (br, 4H), 3.22 (s, 18H), 2.91 (br, 4H), 1.64 (br, 2H);  $^{13}\text{C}$  NMR (125 MHz, DMSO- $d_6$ , 298 K):  $\delta$  163.7 (C=O), 149.5 ( $\text{C}_q$ ), 131.9 (d,  $\text{C}_q$ ,  $J_{\text{C-P}} = 103.7$  Hz), 131.8 (CH), 130.7 (d, CH,  $J_{\text{C-P}} = 9.5$  Hz), 128.8 (CH), 128.7 (CH), 117.8 ( $\text{C}_q$ ), 63.8 ( $\text{CH}_2$ ), 58.7 ( $\text{CH}_2$ ), 52.8 ( $\text{CH}_3$ ), 29.9 (dd,  $\text{CH}_2$ ,  $J_{\text{C-P}} = 64.4$  Hz, 13.1 Hz), 14.8 ( $\text{CH}_2$ ). One  $\text{C}_q$  signal was overlapped;  $^{31}\text{P}$  NMR (202 MHz, DMSO- $d_6$ , 298 K):  $\delta$  7.3; FT-IR (KBr,  $\text{cm}^{-1}$ ): 3054, 3025, 2967, 1713, 1635, 1578, 1498, 1437, 1377, 1253, 1180, 1117, 1026, 956, 794, 761, 716, 695, 503; ESI-TOF MS ( $\text{CH}_3\text{OH}/\text{CH}_3\text{CN}$ )  $m/z$ :  $[\text{M} - 2\text{Cl}]^{2+}$  calcd for  $\text{C}_{51}\text{H}_{56}^{35}\text{Cl}_4\text{N}_4\text{O}_4\text{P}_2$ , 496.13; found 496.18; Elemental Analysis: calcd for  $\text{C}_{51}\text{H}_{56}\text{Cl}_6\text{N}_4\text{O}_4\text{P}_2 \cdot (\text{H}_2\text{O})_3$ : C, 54.80; H, 5.59; N, 5.01. Found C, 54.65; H, 5.50; N, 5.22.

for **NdpP1**

$^1\text{H}$  NMR (500 MHz, DMSO- $d_6$ , 298 K):  $\delta$  7.90 (dd,  $J_{\text{H-H}} = 7.4$  Hz,  $J_{\text{H-P}} = 12.5$  Hz, 8H), 7.42 (s, 4H), 7.31–7.21 (m, 12H), 4.87 (t,  $J_{\text{H-P}} = 13.0$  Hz, 2H), 4.63 (br, 4H), 3.85 (br, 4H), 3.23 (s, 18H);  $^{13}\text{C}$  NMR (125 MHz, DMSO- $d_6$ , 298 K):  $\delta$  163.7 (C=O), 147.9 ( $\text{C}_q$ ), 133.8 (d,  $\text{C}_q$ ,  $J_{\text{C-P}} = 114.4$  Hz), 131.0 (CH), 130.7 (t, CH,  $J_{\text{C-P}} = 4.8$  Hz), 128.5 (CH), 128.1 (t, CH,  $J_{\text{C-P}} = 7.2$  Hz), 127.9 (t,  $\text{C}_q$ ,  $J_{\text{C-P}} = 7.2$  Hz), 116.8 ( $\text{C}_q$ ), 63.8 ( $\text{CH}_2$ ), 58.5 ( $\text{CH}_2$ ), 52.8 ( $\text{CH}_3$ ), 34.7 (t,  $\text{CH}_2$ ,  $J_{\text{C-P}} = 52.5$  Hz);  $^{31}\text{P}$  NMR (202 MHz, DMSO- $d_6$ , 298 K):  $\delta$  -3.6; FT-IR (KBr,  $\text{cm}^{-1}$ ): 3057, 3021, 2963, 1706, 1588, 1506, 1437, 1382, 1254, 1119, 1036, 955, 794, 760, 695, 500; ESI-TOF MS ( $\text{CH}_3\text{OH}/\text{CH}_3\text{CN}$ )  $m/z$ :  $[\text{M} - 2\text{Cl}]^{2+}$  calcd for  $\text{C}_{49}\text{H}_{52}^{35}\text{Cl}_4\text{N}_4\text{O}_4\text{P}_2$ , 482.11; found 482.17; Elemental Analysis: calcd for  $\text{C}_{49}\text{H}_{52}\text{Cl}_6\text{N}_4\text{O}_4\text{P}_2 \cdot (\text{C}_4\text{H}_{10}\text{O})_{0.3} \cdot (\text{H}_2\text{O})_3$ : C, 54.23; H, 5.53; N, 5.04. Found: C, 53.99; H, 5.50; N, 5.25.

for **NdpP2**

$^1\text{H}$  NMR (500 MHz, DMSO- $d_6$ , 298 K):  $\delta$  7.76–7.70 (m, 8H), 7.72 (s, 4H), 7.58 (t,  $J_{\text{H-H}} = 7.4$  Hz, 4H), 7.50 (t,  $J_{\text{H-H}} = 7.4$  Hz, 8H), 4.63 (br, 4H), 3.81 (br, 4H), 3.18 (s, 18H), 2.83 (br, 4H);  $^{13}\text{C}$  NMR (125 MHz, DMSO- $d_6$ , 298 K):  $\delta$  163.5 (C=O), 149.4 ( $\text{C}_q$ ), 132.2 (CH), 130.9 (t, CH,  $J_{\text{C-P}} = 4.8$  Hz), 130.5 (m,  $\text{C}_q$ ), 129.1 (d,  $\text{C}_q$ ,  $J_{\text{C-P}} = 4.8$  Hz), 129.0 (t, CH,  $J_{\text{C-P}} = 6.0$  Hz), 128.8 (CH), 118.4 ( $\text{C}_q$ ), 63.9 ( $\text{CH}_2$ ), 58.7 ( $\text{CH}_2$ ), 52.8 ( $\text{CH}_3$ ), 22.7 (m,

CH<sub>2</sub>); <sup>31</sup>P NMR (202 MHz, DMSO-*d*<sub>6</sub>, 298 K):  $\delta$  7.7; FT-IR (KBr, cm<sup>-1</sup>): 3081, 3002, 2962, 1712, 1577, 1483, 1361, 1251, 1173, 1120, 1034, 957, 793, 758, 727, 696, 629, 518; ESI-TOF MS (CH<sub>3</sub>OH/CH<sub>3</sub>CN) *m/z*: [M – 2Cl]<sup>2+</sup> calcd for C<sub>50</sub>H<sub>54</sub><sup>35</sup>Cl<sub>4</sub>N<sub>4</sub>O<sub>4</sub>P<sub>2</sub>, 489.12; found 489.17; Elemental Analysis: calcd for C<sub>50</sub>H<sub>54</sub>Cl<sub>6</sub>N<sub>4</sub>O<sub>4</sub>P<sub>2</sub>•(H<sub>2</sub>O)<sub>2.8</sub>: C, 54.59; H, 5.46; N, 5.09. Found: C, 54.61; H, 5.30; N, 5.18.

#### for NdpP4

<sup>1</sup>H NMR (500 MHz, DMSO-*d*<sub>6</sub>, 298 K):  $\delta$  7.83 (dd, *J*<sub>H-H</sub> = 7.4 Hz, *J*<sub>H-P</sub> = 12.5 Hz, 8H), 7.75 (s, 4H), 7.54 (td, *J*<sub>H-H</sub> = 7.4 Hz, *J*<sub>H-P</sub> = 1.1 Hz, 4H), 7.48 (td, *J*<sub>H-H</sub> = 7.4 Hz, *J*<sub>H-P</sub> = 2.8 Hz, 8H), 4.64 (br, 4H), 3.83 (br, 4H), 3.20 (s, 18H), 2.81 (br, 4H), 1.50 (br, 4H); <sup>13</sup>C NMR (125 MHz, DMSO-*d*<sub>6</sub>, 298 K):  $\delta$  163.6 (C=O), 149.7 (C<sub>q</sub>), 132.3 (d, C<sub>q</sub>, *J*<sub>C-P</sub> = 102.5 Hz), 131.7 (CH), 130.8 (d, CH, *J*<sub>C-P</sub> = 9.5 Hz), 128.8 (d, CH, *J*<sub>C-P</sub> = 6.0 Hz), 128.7 (CH), 128.6 (C<sub>q</sub>), 117.6 (C<sub>q</sub>), 63.9 (CH<sub>2</sub>), 58.6 (CH<sub>2</sub>), 52.8 (CH<sub>3</sub>), 28.8 (d, CH<sub>2</sub>, *J*<sub>C-P</sub> = 65.6 Hz), 22.3 (d, CH<sub>2</sub>, *J*<sub>C-P</sub> = 15.5 Hz); <sup>31</sup>P NMR (202 MHz, DMSO-*d*<sub>6</sub>, 298 K):  $\delta$  8.0; FT-IR (KBr, cm<sup>-1</sup>): 3055, 3009, 1706, 1579, 1490, 1437, 1385, 1253, 1177, 1116, 1025, 957, 926, 835, 795, 718, 696, 536; ESI-TOF MS (CH<sub>3</sub>OH/CH<sub>3</sub>CN) *m/z*: [M – 2Cl]<sup>2+</sup> calcd for C<sub>52</sub>H<sub>58</sub><sup>35</sup>Cl<sub>4</sub>N<sub>4</sub>O<sub>4</sub>P<sub>2</sub>, 503.13; found 503.18; Elemental Analysis: calcd for C<sub>52</sub>H<sub>58</sub>Cl<sub>6</sub>N<sub>4</sub>O<sub>4</sub>P<sub>2</sub>•(H<sub>2</sub>O)<sub>3.3</sub>: C, 54.92; H, 5.73; N, 4.93. Found: C, 54.90; H, 5.53; N, 4.99.

#### for NdpP5

<sup>1</sup>H NMR (500 MHz, DMSO-*d*<sub>6</sub>, 298 K):  $\delta$  7.83 (dd, *J*<sub>H-H</sub> = 6.8 Hz, *J*<sub>H-P</sub> = 11.9 Hz, 8H), 7.76 (s, 4H), 7.55 (t, *J*<sub>H-H</sub> = 6.8 Hz, 4H), 7.50 (td, *J*<sub>H-H</sub> = 6.8 Hz, *J*<sub>H-P</sub> = 2.8 Hz, 8H), 4.64 (br, 4H), 3.83 (br, 4H), 3.20 (s, 18H), 2.69 (br, 4H), 1.37–1.27 (m, 6H); <sup>13</sup>C NMR (125 MHz, DMSO-*d*<sub>6</sub>, 298 K):  $\delta$  163.6 (C=O), 149.7 (C<sub>q</sub>), 132.4 (d, C<sub>q</sub>, *J*<sub>C-P</sub> = 103.7 Hz), 131.7 (CH), 130.7 (d, CH, *J*<sub>C-P</sub> = 9.5 Hz), 128.8 (d, CH, *J*<sub>C-P</sub> = 7.2 Hz), 128.7 (CH), 128.6 (d, C<sub>q</sub>, *J*<sub>C-P</sub> = 10.7 Hz), 117.6 (C<sub>q</sub>), 63.8 (CH<sub>2</sub>), 58.6 (CH<sub>2</sub>), 52.8 (CH<sub>3</sub>), 30.1 (t, CH<sub>2</sub>, *J*<sub>C-P</sub> = 13.1 Hz), 28.6 (d, CH<sub>2</sub>, *J*<sub>C-P</sub> = 64.4 Hz), 20.5 (CH<sub>2</sub>); <sup>31</sup>P NMR (202 MHz, DMSO-*d*<sub>6</sub>, 298 K):  $\delta$  7.9; FT-IR (KBr, cm<sup>-1</sup>): 3054, 2943, 1709, 1577, 1497, 1437, 1377, 1253, 1180, 1117, 1036, 1025, 956, 794, 761, 716, 696; ESI-TOF MS (CH<sub>3</sub>OH/CH<sub>3</sub>CN) *m/z*: [M – 2Cl]<sup>2+</sup> calcd for C<sub>53</sub>H<sub>60</sub><sup>35</sup>Cl<sub>4</sub>N<sub>4</sub>O<sub>4</sub>P<sub>2</sub>, 510.14; found 510.19; Elemental Analysis: calcd for C<sub>53</sub>H<sub>60</sub>Cl<sub>6</sub>N<sub>4</sub>O<sub>4</sub>P<sub>2</sub>•(H<sub>2</sub>O)<sub>3</sub>: C, 55.56; H, 5.81; N, 4.89. Found: C, 55.61; H, 5.65; N, 5.08.

#### for NdpP6

$^1\text{H}$  NMR (500 MHz, DMSO- $d_6$ , 298 K):  $\delta$  7.85 (dd,  $J_{\text{H-H}} = 7.4$  Hz,  $J_{\text{H-P}} = 11.9$  Hz, 8H), 7.76 (d,  $J_{\text{H-P}} = 1.1$  Hz, 4H), 7.54 (t,  $J_{\text{H-H}} = 7.3$  Hz, 4H), 7.50 (td,  $J_{\text{H-H}} = 7.3$  Hz,  $J_{\text{H-P}} = 2.8$  Hz, 8H), 4.64 (br, 4H), 3.83 (br, 4H), 3.20 (s, 18H), 2.75 (br, 4H), 1.35–1.16 (m, 8H);  $^{13}\text{C}$  NMR (125 MHz, DMSO- $d_6$ , 298 K):  $\delta$  163.6 (C=O), 149.8 ( $C_q$ ), 132.5 (d,  $C_q$ ,  $J_{\text{C-P}} = 103.7$  Hz), 131.7 (CH), 130.7 (d, CH,  $J_{\text{C-P}} = 9.5$  Hz), 128.8 (d, CH,  $J_{\text{C-P}} = 8.3$  Hz), 128.7 (CH), 128.6 (d,  $C_q$ ,  $J_{\text{C-P}} = 11.9$  Hz), 117.5 ( $C_q$ ), 63.8 ( $\text{CH}_2$ ), 58.6 ( $\text{CH}_2$ ), 52.8 ( $\text{CH}_3$ ), 28.9 (d,  $\text{CH}_2$ ,  $J_{\text{C-P}} = 13.1$  Hz), 28.7 (d,  $\text{CH}_2$ ,  $J_{\text{C-P}} = 64.4$  Hz), 20.9 ( $\text{CH}_2$ );  $^{31}\text{P}$  NMR (202 MHz, DMSO- $d_6$ , 298 K):  $\delta$  7.8; FT-IR (KBr,  $\text{cm}^{-1}$ ): 2931, 1715, 1577, 1506, 1437, 1376, 1253, 1117, 1025, 956, 794, 761, 695, 502; ESI-TOF MS ( $\text{CH}_3\text{OH}/\text{CH}_3\text{CN}$ )  $m/z$ :  $[\text{M} - 2\text{Cl}]^{2+}$  calcd for  $\text{C}_{54}\text{H}_{62}^{35}\text{Cl}_4\text{N}_4\text{O}_4\text{P}_2$ , 517.15; found 517.20; Elemental Analysis: calcd for  $\text{C}_{54}\text{H}_{62}\text{Cl}_6\text{N}_4\text{O}_4\text{P}_2 \cdot (\text{H}_2\text{O})_{3.5} \cdot (\text{CHCl}_3)_{0.1}$ : C, 55.03; H, 5.90; N, 4.75. Found: C, 54.74; H, 5.69; N, 4.99.

#### for nNdpP3

$^1\text{H}$  NMR (500 MHz, DMSO- $d_6$ , 298 K):  $\delta$  7.66 (dd,  $J_{\text{H-H}} = 7.5$  Hz,  $J_{\text{H-P}} = 11.5$  Hz, 8H), 7.61–7.54 (m, 8H), 7.48 (td,  $J_{\text{H-H}} = 7.5$  Hz,  $J_{\text{H-P}} = 2.6$  Hz, 8H), 6.54 (d,  $J_{\text{H-H}} = 8.6$  Hz, 4H), 4.61 (br, 4H), 3.79 (br, 4H), 3.20 (s, 18H), 2.89 (br, 4H), 1.52 (br, 2H);  $^{13}\text{C}$  NMR (125 MHz, DMSO- $d_6$ , 298 K):  $\delta$  165.4 (C=O), 158.1 ( $C_q$ ), 132.1 (CH), 131.1 (d, CH,  $J_{\text{C-P}} = 8.3$  Hz), 130.7 (CH), 129.0 (d, CH,  $J_{\text{C-P}} = 10.7$  Hz), 122.0 (d,  $C_q$ ,  $J_{\text{C-P}} = 20.3$  Hz), 116.0 ( $C_q$ ), 64.2 ( $\text{CH}_2$ ), 57.7 ( $\text{CH}_2$ ), 52.9 ( $\text{CH}_3$ ), 26.0 (dd,  $\text{CH}_2$ ,  $J_{\text{C-P}} = 65.6$  Hz, 10.7 Hz), 14.8 ( $\text{CH}_2$ ). One  $C_q$  signal was overlapped;  $^{31}\text{P}$  NMR (202 MHz, DMSO- $d_6$ , 298 K):  $\delta$  9.5; FT-IR (KBr,  $\text{cm}^{-1}$ ): 3024, 2547, 2103, 1918, 1700, 1593, 1542, 1506, 1437, 1339, 1266, 1169, 1105, 1017, 949, 849, 772, 717; ESI-TOF MS ( $\text{CH}_3\text{OH}/\text{CH}_3\text{CN}$ )  $m/z$ :  $[\text{M} - 2\text{Cl}]^{2+}$  calcd for  $\text{C}_{51}\text{H}_{60}^{35}\text{Cl}_2\text{N}_4\text{O}_4\text{P}_2$ , 427.20; found 427.20; Elemental Analysis: calcd for  $\text{C}_{51}\text{H}_{60}\text{Cl}_2\text{N}_4\text{O}_4\text{P}_2 \cdot (\text{H}_2\text{O})_{2.5} \cdot (\text{C}_2\text{H}_3\text{N})_{0.1} \cdot (\text{C}_4\text{H}_{10}\text{O})_{0.1}$ : C, 62.76; H, 6.68; N, 6.10. Found: C, 62.82; H, 6.91; N, 6.09.

## 2.2. Preparation of NPPh2Me via the Staudinger reaction

YA1-176

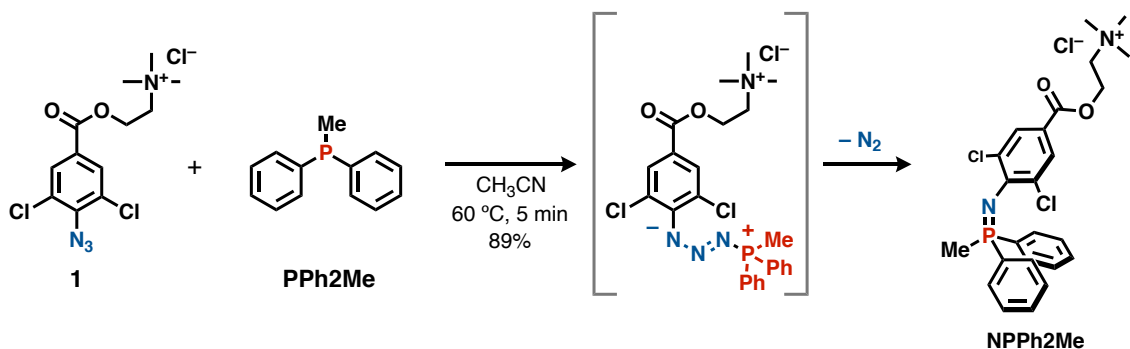

A  $\text{CH}_3\text{CN}$  solution (20 mL) of hydrophilic azide **1** (100 mg, 0.283 mmol) and methyldiphenylphosphine (**PPh2Me**; 58  $\mu\text{L}$ , 0.309 mmol, 1.1 equiv.) was added to a 50 mL glass flask, and the mixture was stirred at  $60\text{ }^\circ\text{C}$  for 5 min. After the solution color changed from bright yellow to colorless, the solvent was removed under reduced pressure. The obtained solid was purified by reprecipitation ( $\text{CH}_3\text{CN}/\text{Et}_2\text{O}$ ) and washed with  $\text{Et}_2\text{O}$  to afford **NPPh2Me** as a hygroscopic brown solid (132 mg, 89%).

$^1\text{H}$  NMR (500 MHz,  $\text{DMSO}-d_6$ , 298 K):  $\delta$  7.91 (ddd,  $J_{\text{H-H}} = 6.8\text{ Hz}$ ,  $1.7\text{ Hz}$ ,  $J_{\text{H-P}} = 12.5\text{ Hz}$ , 4H), 7.78 (d,  $J_{\text{H-P}} = 1.7\text{ Hz}$ , 2H), 7.53 (td,  $J_{\text{H-H}} = 6.8\text{ Hz}$ ,  $J_{\text{H-P}} = 1.7\text{ Hz}$ , 2H), 7.52 (td,  $J_{\text{H-H}} = 6.8\text{ Hz}$ ,  $J_{\text{H-P}} = 3.4\text{ Hz}$ , 4H), 4.64 (br, 2H), 3.82 (br, 2H), 3.19 (s, 9H), 2.46 (d,  $J_{\text{H-P}} = 12.5\text{ Hz}$ , 3H);  $^{13}\text{C}$  NMR (125 MHz,  $\text{DMSO}-d_6$ , 298 K):  $\delta$  163.6 (C=O), 149.7 ( $\text{C}_q$ ), 133.6 (d,  $\text{C}_q$ ,  $J_{\text{C-P}} = 106.9\text{ Hz}$ ), 131.7 (CH), 130.5 (d, CH,  $J_{\text{C-P}} = 10.3\text{ Hz}$ ), 128.8 (d, CH,  $J_{\text{C-P}} = 7.8\text{ Hz}$ ), 128.7 (CH), 128.6 (d,  $\text{C}_q$ ,  $J_{\text{C-P}} = 11.5\text{ Hz}$ ), 117.7 ( $\text{C}_q$ ), 63.9 ( $\text{CH}_2$ ), 58.6 ( $\text{CH}_2$ ), 52.8 ( $\text{CH}_3$ ), 16.8 (d,  $\text{CH}_3$ ,  $J_{\text{C-P}} = 65.6\text{ Hz}$ );  $^{31}\text{P}$  NMR (202 MHz,  $\text{DMSO}-d_6$ , 298 K):  $\delta$  5.0; FT-IR (KBr,  $\text{cm}^{-1}$ ): 3055, 3013, 2967, 2535, 2120, 1980, 1714, 1588, 1498, 1437, 1376, 1251, 1181, 1119, 1026, 997, 957, 881, 794, 762, 743; ESI-TOF MS ( $\text{CH}_3\text{OH}/\text{CH}_3\text{CN}$ )  $m/z$ :  $[\text{M} - \text{Cl}]^+$  calcd for  $\text{C}_{25}\text{H}_{28}^{35}\text{Cl}_2\text{N}_2\text{O}_2\text{P}$ , 489.13; found 489.13; Elemental Analysis: calcd for  $\text{C}_{25}\text{H}_{28}\text{Cl}_3\text{N}_2\text{O}_2\text{P} \cdot (\text{H}_2\text{O})_{1.4} \cdot (\text{C}_2\text{H}_2\text{N})_{0.2}$ : C, 54.55; H, 5.66; N, 5.51. Found C, 54.44; H, 5.65; N, 5.42.

### 3. X-ray crystallography

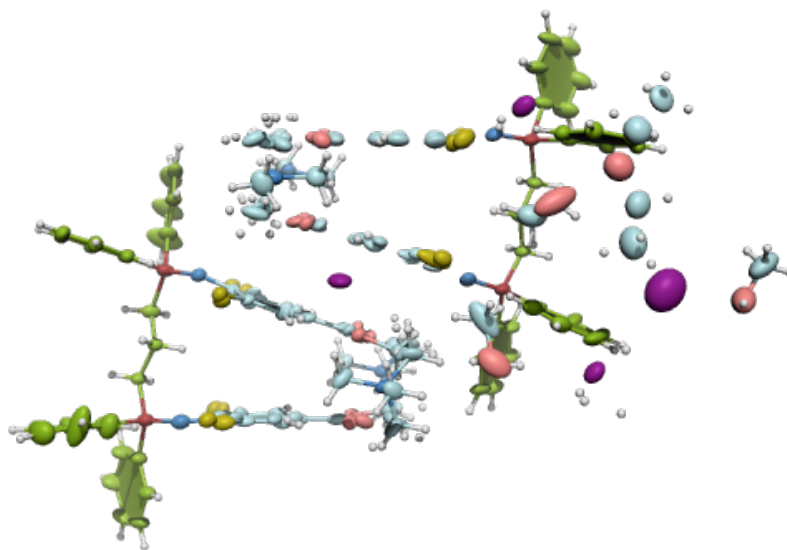

**Figure S2.** ORTEP drawing of **NdpP3<sup>I</sup>**, an analogue of **NdpP3** (phosphorus (red), nitrogen (blue), oxygen (pink), carbon (green and light blue), chlorine (yellow), iodine (purple). The thermal ellipsoids are drawn at 50% probability.

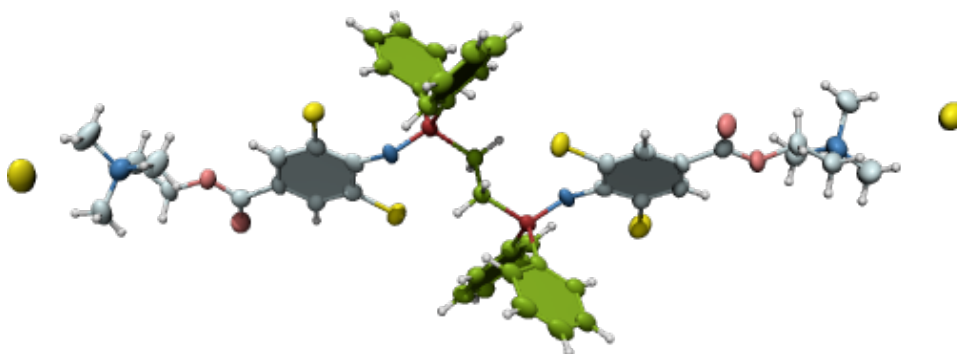

**Figure S3.** ORTEP drawing of **NdpP2** (phosphorus (red), nitrogen (blue), oxygen (pink), carbon (green and light blue), chlorine (yellow). The thermal ellipsoids are drawn at 50% probability.

**Table S1. Crystal data and structure refinement.**

| Compounds                                           | NdpP3 <sup>1</sup>                                                                                                | NdpP2                                                                                        |
|-----------------------------------------------------|-------------------------------------------------------------------------------------------------------------------|----------------------------------------------------------------------------------------------|
| Identification code                                 | NdpP3I                                                                                                            | NdpP2                                                                                        |
| CCDC number                                         | 2342817                                                                                                           | 2342818                                                                                      |
| Empirical formula                                   | C <sub>54.09</sub> H <sub>64.09</sub> Cl <sub>4</sub> I <sub>2</sub> N <sub>4</sub> O <sub>6</sub> P <sub>2</sub> | C <sub>50</sub> H <sub>54</sub> Cl <sub>6</sub> N <sub>4</sub> O <sub>4</sub> P <sub>2</sub> |
| Formula weight                                      | 1323.83                                                                                                           | 1049.61                                                                                      |
| Temperature (K)                                     | 93                                                                                                                | 123                                                                                          |
| Wavelength (Å)                                      | 0.750                                                                                                             | 1.54184                                                                                      |
| Crystal system                                      | monoclinic                                                                                                        | triclinic                                                                                    |
| Space group                                         | P2 <sub>1</sub> /n                                                                                                | P-1                                                                                          |
| Unit cell dimensions                                |                                                                                                                   |                                                                                              |
| <i>a</i> (Å)                                        | 21.492(3)                                                                                                         | 9.4418(3)                                                                                    |
| <i>b</i> (Å)                                        | 22.384(6)                                                                                                         | 17.2643(12)                                                                                  |
| <i>c</i> (Å)                                        | 26.001(4)                                                                                                         | 17.5420(10)                                                                                  |
| α (°)                                               | 90                                                                                                                | 78.146(5)                                                                                    |
| β (°)                                               | 111.870(9)                                                                                                        | 78.602(4)                                                                                    |
| γ (°)                                               | 90                                                                                                                | 81.396(4)                                                                                    |
| Volume (Å <sup>3</sup> )                            | 11608(4)                                                                                                          | 2725.5(3)                                                                                    |
| <i>Z</i>                                            | 8                                                                                                                 | 2                                                                                            |
| Density (calculated)                                | 1.515                                                                                                             | 1.279                                                                                        |
| Absorption coefficient                              | 1.577                                                                                                             | 3.789                                                                                        |
| <i>F</i> (000)                                      | 5349.0                                                                                                            | 1092.0                                                                                       |
| Crystal size                                        | 0.2 × 0.1 × 0.1                                                                                                   | 0.251 × 0.133 × 0.082                                                                        |
| 2θ range for data collection                        | 2.226 to 71.372                                                                                                   | 5.226 to 134.15                                                                              |
| Index ranges                                        | −32 ≤ <i>h</i> ≤ 33                                                                                               | −10 ≤ <i>h</i> ≤ 11                                                                          |
|                                                     | −33 ≤ <i>k</i> ≤ 32                                                                                               | −20 ≤ <i>k</i> ≤ 20                                                                          |
|                                                     | −40 ≤ <i>l</i> ≤ 40                                                                                               | −20 ≤ <i>l</i> ≤ 20                                                                          |
| Reflections collected                               | 125809                                                                                                            | 27888                                                                                        |
| Independent reflections                             | 43115 [R <sub>int</sub> = 0.0529]                                                                                 | 9693 [R <sub>int</sub> = 0.0974]                                                             |
| Completeness to θ                                   | 0.942                                                                                                             | 0.997                                                                                        |
| Absorption correction                               | multi-scan                                                                                                        | multi-scan                                                                                   |
| Refinement method                                   | Full-matrix least-squares on F <sup>2</sup>                                                                       | Full-matrix least-squares on F <sup>2</sup>                                                  |
| Data / restraints / parameters                      | 43115/326/1851                                                                                                    | 9693/0/601                                                                                   |
| Goodness-of-fit on F <sup>2</sup>                   | 1.038                                                                                                             | 1.045                                                                                        |
| Final <i>R</i> indices [ <i>I</i> > 2σ( <i>I</i> )] | R <sub>1</sub> = 0.0931                                                                                           | R <sub>1</sub> = 0.1280                                                                      |
|                                                     | wR <sub>2</sub> = 0.2728                                                                                          | wR <sub>2</sub> = 0.3646                                                                     |
| <i>R</i> indices (all data)                         | R <sub>1</sub> = 0.1877                                                                                           | R <sub>1</sub> = 0.1725                                                                      |
|                                                     | wR <sub>2</sub> = 0.3325                                                                                          | wR <sub>2</sub> = 0.3917                                                                     |
| Largest diff. peak and hole                         | 1.514 and −1.831 e Å <sup>−3</sup>                                                                                | 0.855 and −0.787 e Å <sup>−3</sup>                                                           |



#### 4. UV-vis and fluorescence spectra of NdpP3

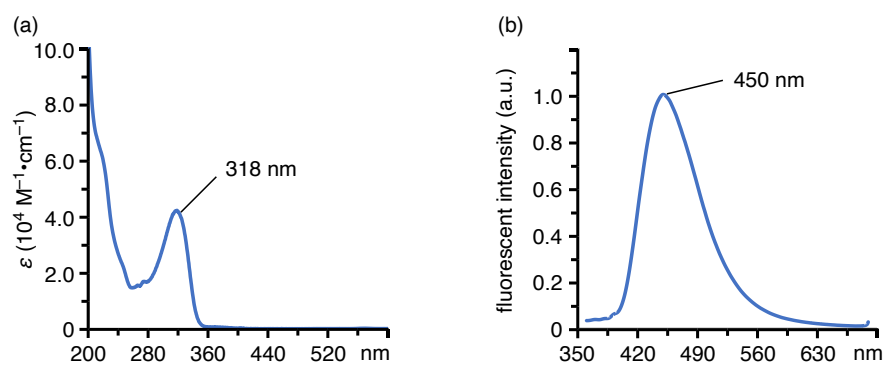

**Figure S4.** (a) UV-vis and (b) fluorescence spectra (CH<sub>3</sub>CN, 298 K, 0.05 mM) of NdpP3.

## 5. Stability in water

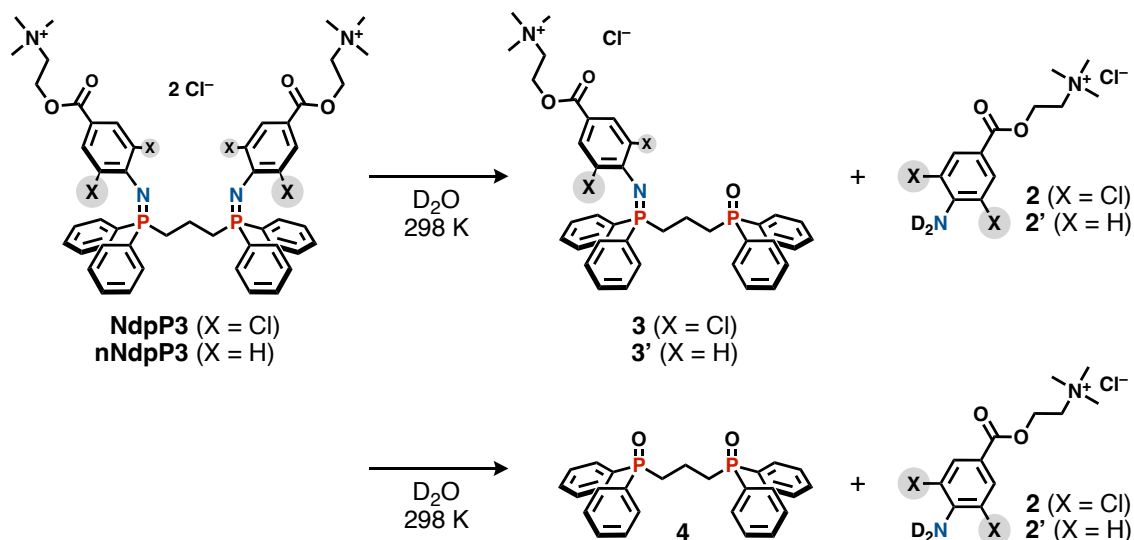

**NdP3** (X = Cl, 2.7 mg, 2.5  $\mu\text{mol}$ ) was dissolved in  $\text{D}_2\text{O}$  (5.0 mL). The stability of azaylides against water was monitored by  $^1\text{H}$  NMR analysis at room temperature (298 K). The stability of **nNdP3** (X = H) for water was also evaluated by the same procedure as **NdP3**.

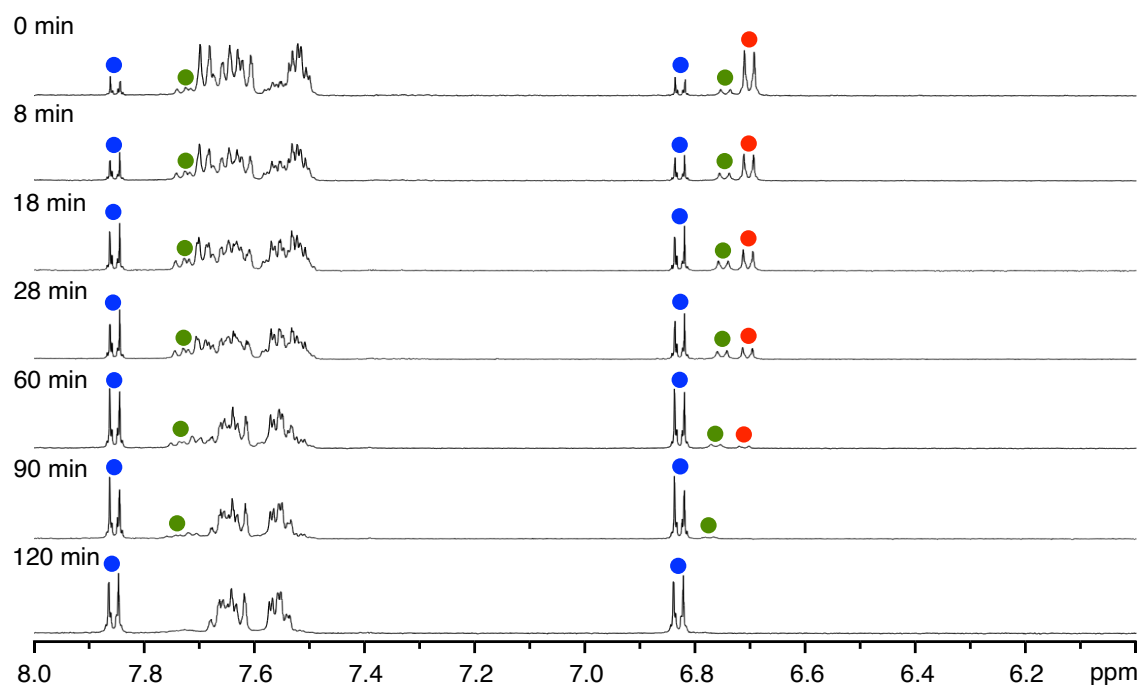

**Figure S5.** Time-course  $^1\text{H}$  NMR spectra (500 MHz, 298 K,  $\text{D}_2\text{O}$ , 0.5 mM) of **nNdP3** (red: **nNdP3**, blue: **2'**, green: **3'**).

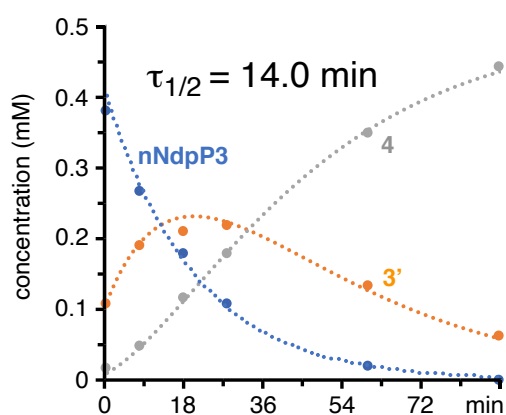

**Figure S6.** Changes in concentrations of **nNdpP3**, **3'**, and **4** during decomposition of **nNdpP3**.

**Table S2.** Changes in concentrations of **nNdpP3**, **3'**, and **4** and half-life of **nNdpP3**.

|                        | Concentration (mM) <sup>[a]</sup> |       |       |       |       |       |           | $k_1$ <sup>[c]</sup> | $k_2$ <sup>[c]</sup> | $\tau_{1/2}$ <sup>[d]</sup> |
|------------------------|-----------------------------------|-------|-------|-------|-------|-------|-----------|----------------------|----------------------|-----------------------------|
|                        | 0                                 | 8     | 18    | 28    | 60    | 90    | 120 (min) | min <sup>-1</sup>    | min <sup>-1</sup>    | min                         |
| <b>nNdpP3</b>          | 0.377                             | 0.264 | 0.177 | 0.108 | 0.020 | 0.000 | 0.000     |                      |                      |                             |
| <b>2'</b>              | 0.137                             | 0.284 | 0.439 | 0.568 | 0.828 | 0.939 | 1.000     |                      |                      |                             |
| <b>3'</b>              | 0.108                             | 0.189 | 0.208 | 0.216 | 0.132 | 0.061 | 0.000     | 0.049                | 0.030                | 14.0                        |
| <b>4<sup>[b]</sup></b> | 0.015                             | 0.048 | 0.115 | 0.176 | 0.348 | 0.439 | 0.500     |                      |                      |                             |

[a]: Calculated by NMR signal intensities. [b]: Calculated by  $[\text{nNdpP3}]_0 - ([\text{nNdpP3}] + [\text{3'}])$ .

[c]: Decomposition rate constants of **nNdpP3** ( $k_1$ ) and **3'** ( $k_2$ ).

Calculated by reaction rate equation of consecutive first order reaction.

[d]: Half-life of **nNdpP3** calculated by  $\tau_{1/2} = (1/k_1) \ln 2$ .

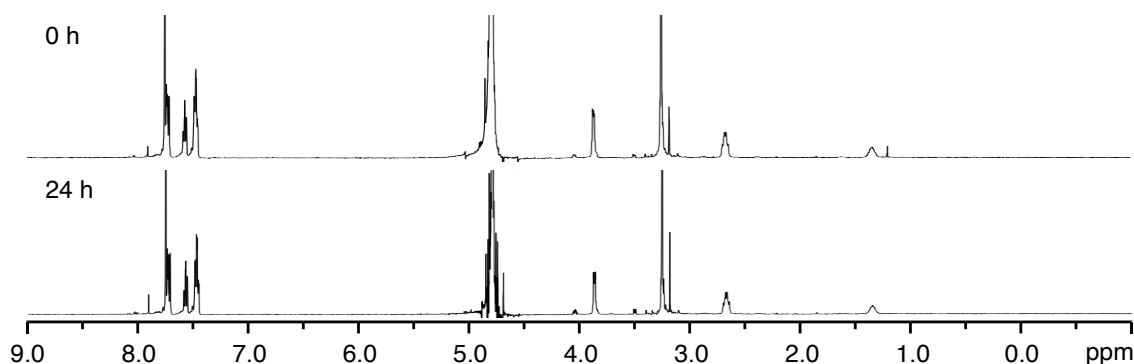

**Figure S7.** <sup>1</sup>H NMR spectra (500 MHz, 298 K, D<sub>2</sub>O, 0.5 mM of **NdpP3** (0 h (top) and after 24 h (bottom)).

## 6. Formation of assemblies

### 6.1. Preparation of assemblies

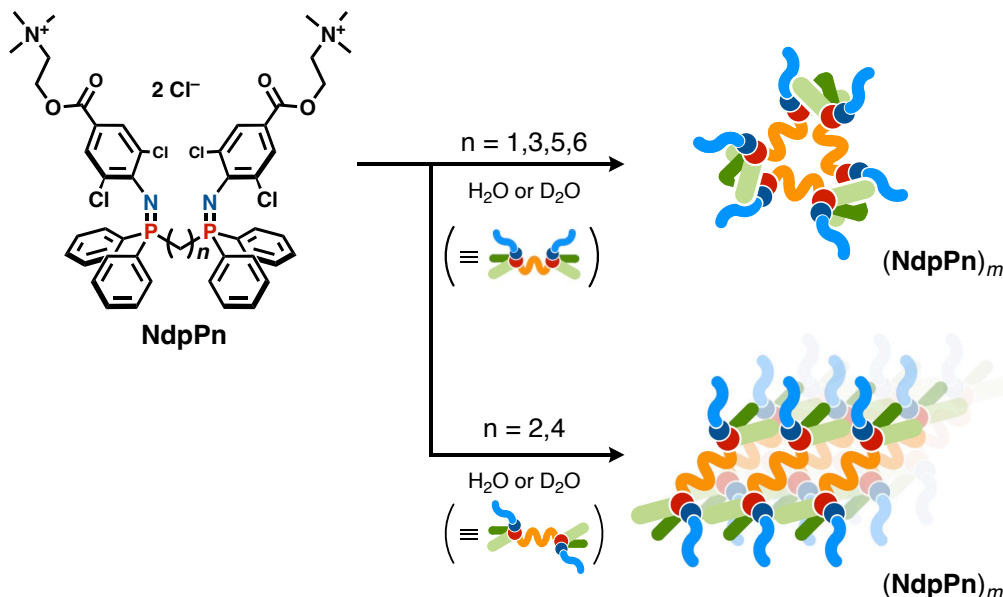

A gemini amphiphile **NdpPn** (2.0  $\mu\text{mol}$ ) was dissolved in  $\text{H}_2\text{O}$  or  $\text{D}_2\text{O}$  (1.0 mL). The formation of either micelles or layered structures was confirmed by NMR, DLS, and electron microscopic analyses.

for  $(\text{NdpP3})_m$

$^1\text{H}$  NMR (500 MHz,  $\text{D}_2\text{O}$ , 298 K, 2.0 mM based on **NdpP3**):  $\delta$  7.84–7.11 (br, 24H), 4.66 (br, 4H), 3.75 (br, 4H), 3.15 (br, 18H), 2.58 (br, 4H), 1.42 (br, 2H);  $^{31}\text{P}$  NMR (202 MHz,  $\text{D}_2\text{O}$ , 298 K, 2.0 mM based on **NdpP3**):  $\delta$  13.7.

for  $(\text{NdpP1})_m$

$^1\text{H}$  NMR (500 MHz,  $\text{D}_2\text{O}$ , 298 K, 2.0 mM based on **NdpP1**):  $\delta$  7.78 (br, 8H), 7.45 (br, 4H), 7.19 (br, 12H), 4.60 (br, 4H), 3.72 (br, 4H), 3.15 (br, 18H). The methylene signal was overlapped with HDO signal;  $^{31}\text{P}$  NMR (202 MHz,  $\text{D}_2\text{O}$ , 298 K, 2.0 mM based on **NdpP1**):  $\delta$  -2.3.

for (**NdpP5**)<sub>m</sub>

<sup>1</sup>H NMR (500 MHz, D<sub>2</sub>O, 298 K, 2.0 mM based on **NdpP5**):  $\delta$  7.82–6.84 (br, 24H), 4.52 (br, 4H), 3.64 (br, 4H), 3.05 (br, 18H), 2.29 (br, 4H), 1.09 (br, 6H); <sup>31</sup>P NMR (202 MHz, D<sub>2</sub>O, 298 K, 2.0 mM based on **NdpP5**):  $\delta$  9.4.

for (**NdpP2**)<sub>m</sub>

<sup>1</sup>H NMR (500 MHz, D<sub>2</sub>O, 298 K, 2.0 mM based on **NdpP2**):  $\delta$  7.80 (s, 4H), 7.70 (dd,  $J_{\text{H-H}} = 7.4$  Hz,  $J_{\text{H-P}} = 12.5$  Hz, 8H), 7.61 (t,  $J_{\text{H-H}} = 7.4$  Hz, 4H), 7.48 (dd,  $J_{\text{H-H}} = 7.4$  Hz, 7.4 Hz, 8H), 3.86 (br, 4H), 3.24 (s, 18H), 2.59 (br, 4H). The methylene signal was overlapped with HDO signal; <sup>31</sup>P NMR (202 MHz, D<sub>2</sub>O, 298 K, 2.0 mM based on **NdpP2**):  $\delta$  16.0.

for (**NdpP4**)<sub>m</sub>

<sup>1</sup>H NMR (500 MHz, D<sub>2</sub>O, 298 K, 2.0 mM based on **NdpP4**):  $\delta$  7.85 (s, 4H), 7.72 (dd,  $J_{\text{H-H}} = 7.4$  Hz,  $J_{\text{H-P}} = 11.9$  Hz, 8H), 7.58 (t,  $J_{\text{H-H}} = 7.4$  Hz, 4H), 7.48 (ddd,  $J_{\text{H-H}} = 7.4$  Hz, 7.4 Hz,  $J_{\text{H-P}} = 2.3$  Hz, 8H), 4.69 (br, 4H), 3.78 (br, 4H), 3.18 (s, 18H), 2.30 (br, 4H); <sup>31</sup>P NMR (202 MHz, D<sub>2</sub>O, 298 K, 2.0 mM based on **NdpP4**):  $\delta$  15.6.

for (**NdpP6**)<sub>m</sub>

<sup>1</sup>H NMR (500 MHz, D<sub>2</sub>O, 298 K, 2.0 mM based on **NdpP6**):  $\delta$  7.80–6.93 (br, 24H), 4.50 (br, 4H), 3.62 (br, 4H), 3.03 (br, 18H), 2.32 (br, 4H), 1.27–0.54 (br, 8H); <sup>31</sup>P NMR (202 MHz, D<sub>2</sub>O, 298 K, 2.0 mM based on **NdpP6**):  $\delta$  9.5.

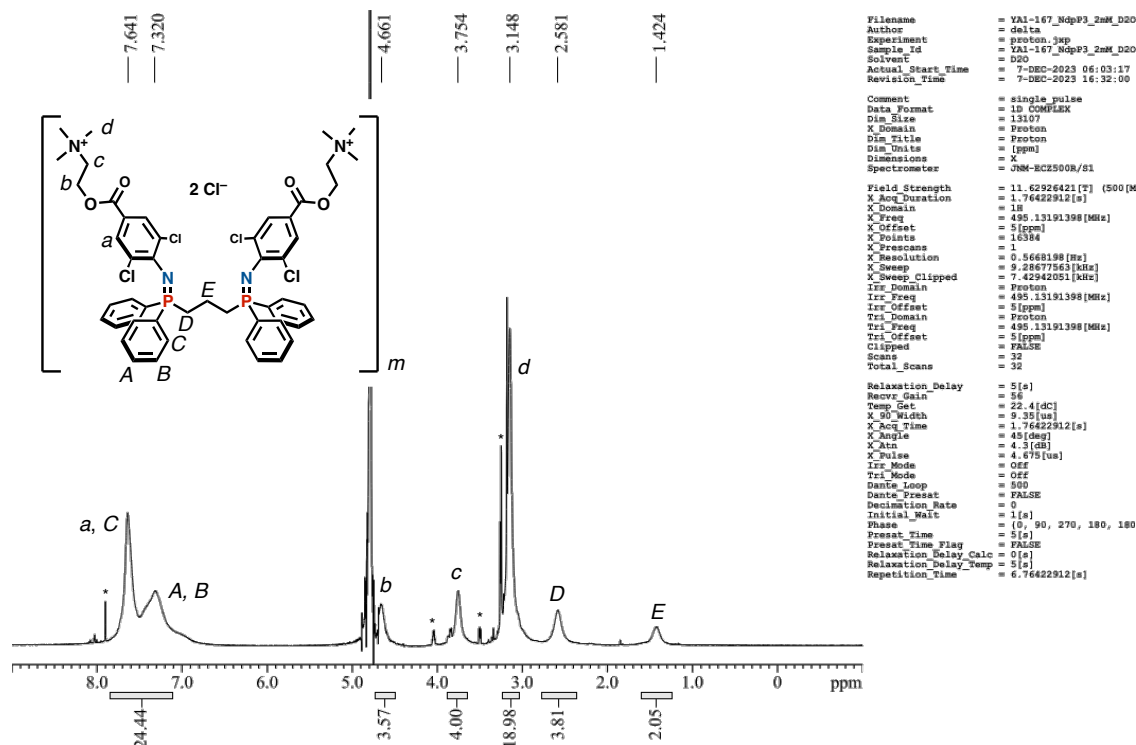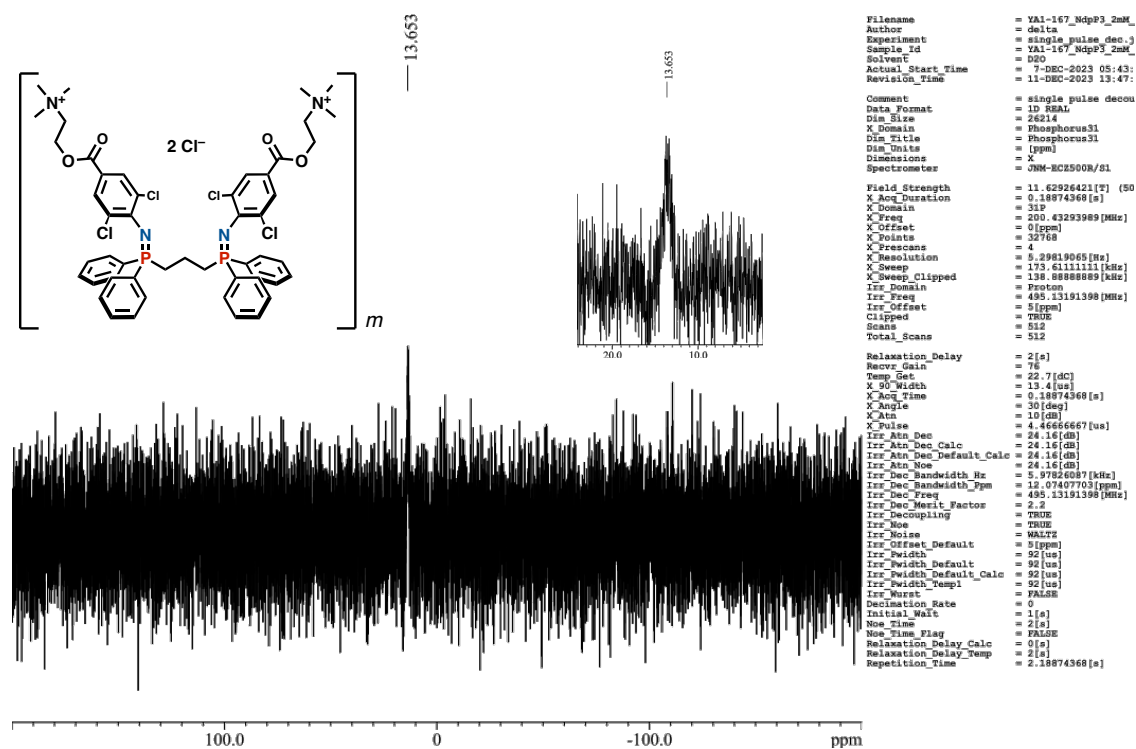

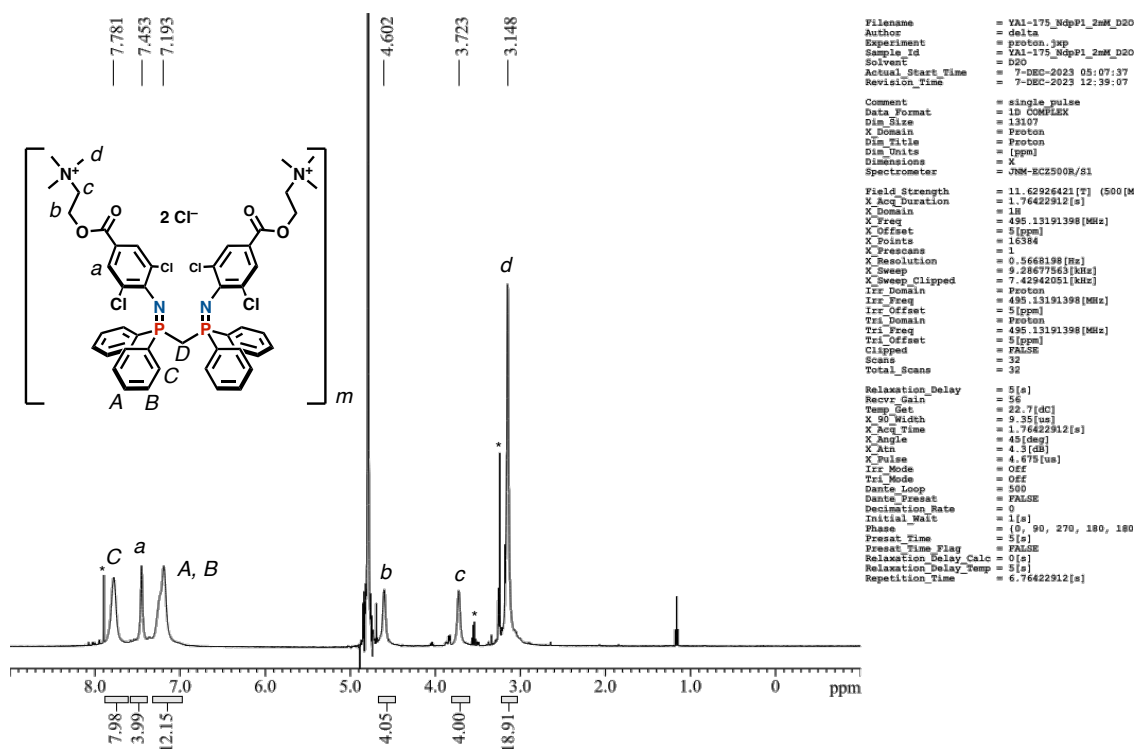

Figure S10. <sup>1</sup>H NMR spectrum (500 MHz, D<sub>2</sub>O, 298 K, 2.0 mM based on NdpP1) of (NdpP1)<sub>m</sub>.

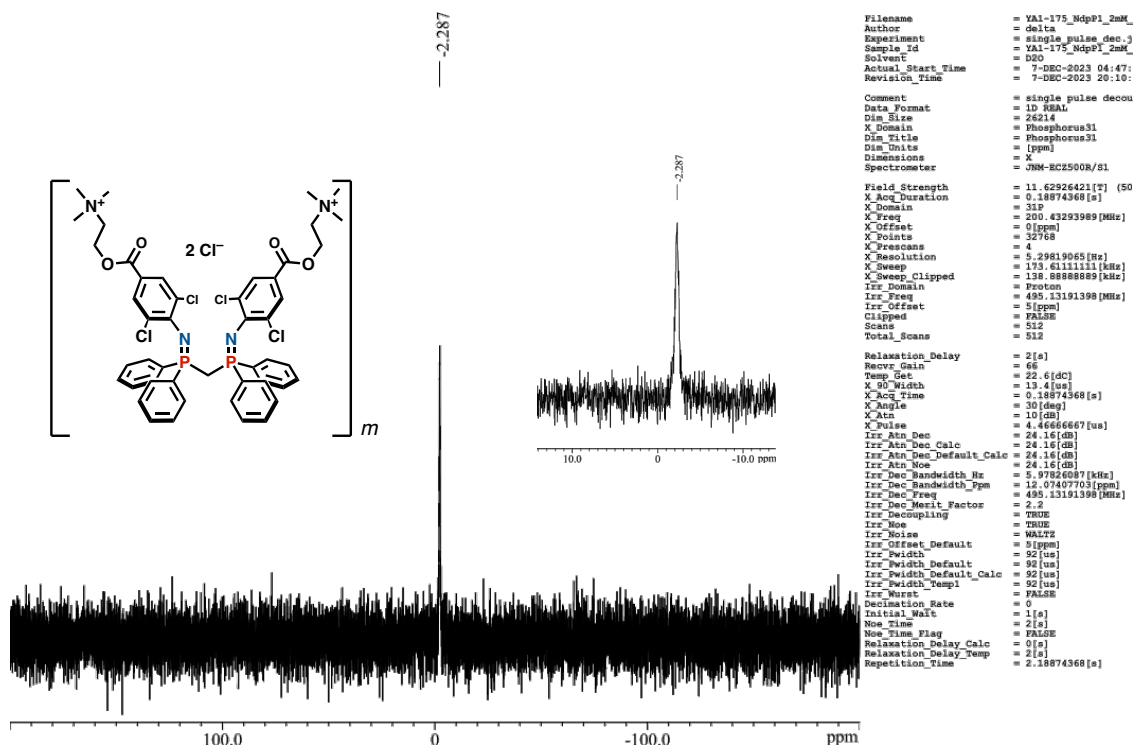

Figure S11. <sup>31</sup>P NMR spectrum (202 MHz, D<sub>2</sub>O, 298 K, 2.0 mM based on NdpP1) of (NdpP1)<sub>m</sub>.

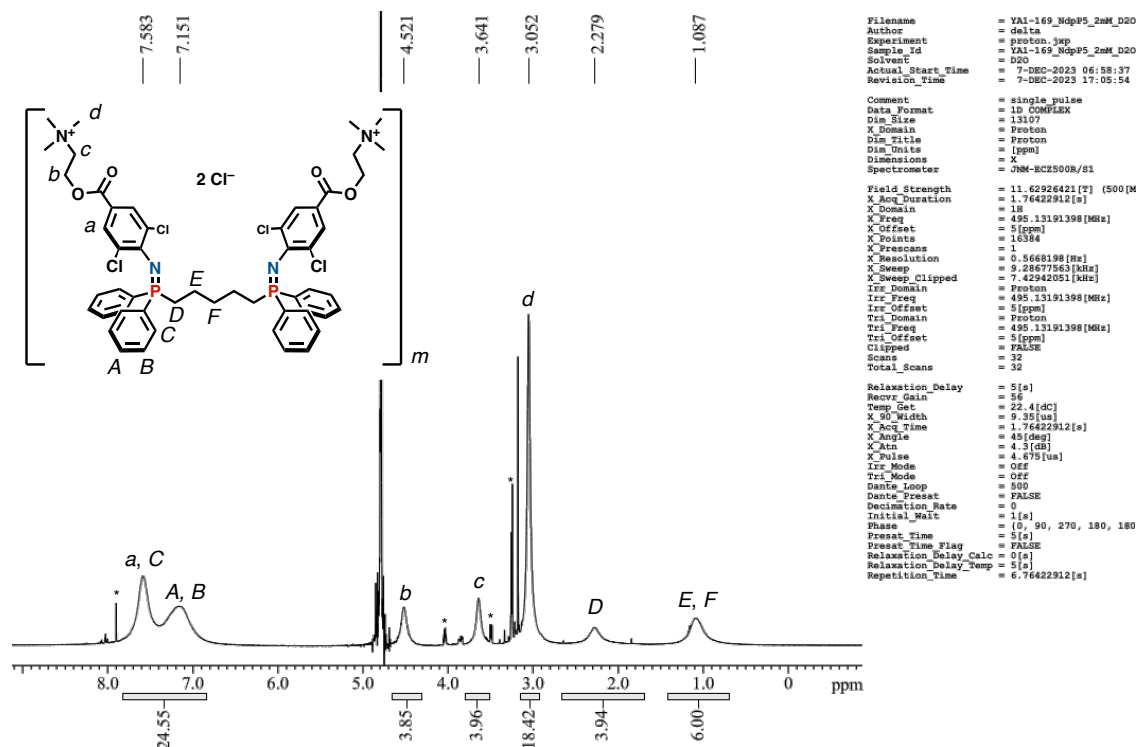

Figure S12.  $^1\text{H}$  NMR spectrum (500 MHz,  $\text{D}_2\text{O}$ , 298 K, 2.0 mM based on  $\text{NdpP5}$ ) of  $(\text{NdpP5})_m$ .

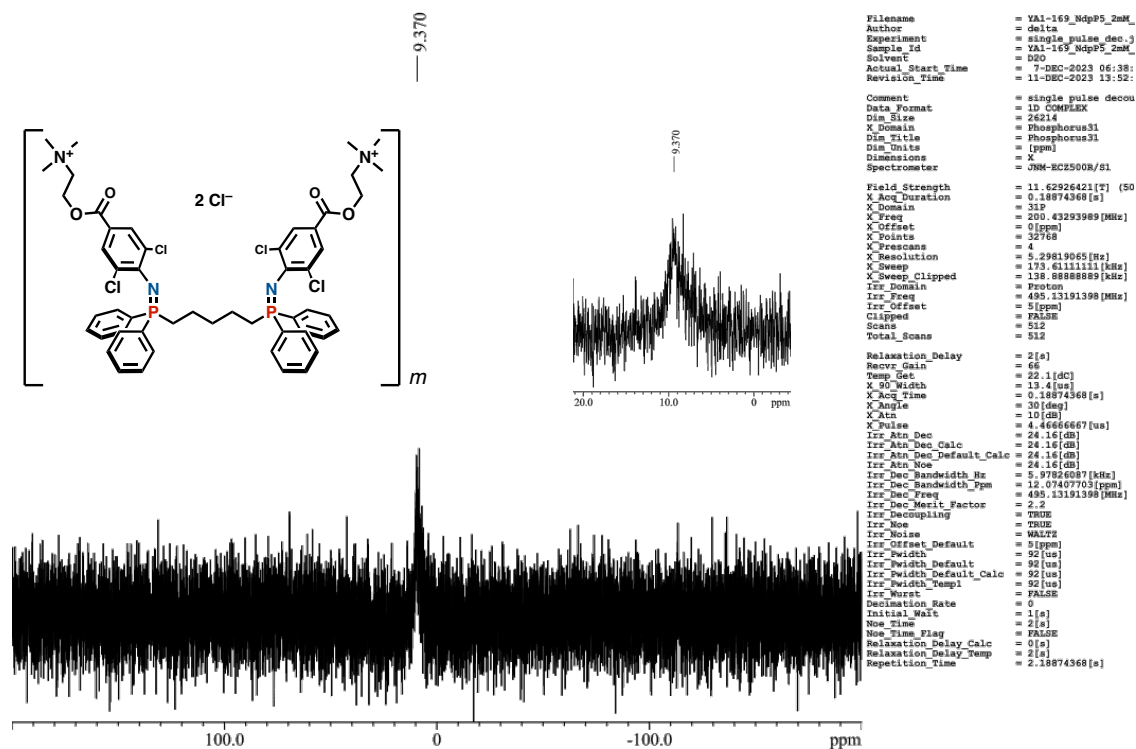

Figure S13.  $^{31}\text{P}$  NMR spectrum (202 MHz,  $\text{D}_2\text{O}$ , 298 K, 2.0 mM based on  $\text{NdpP5}$ ) of  $(\text{NdpP5})_m$ .



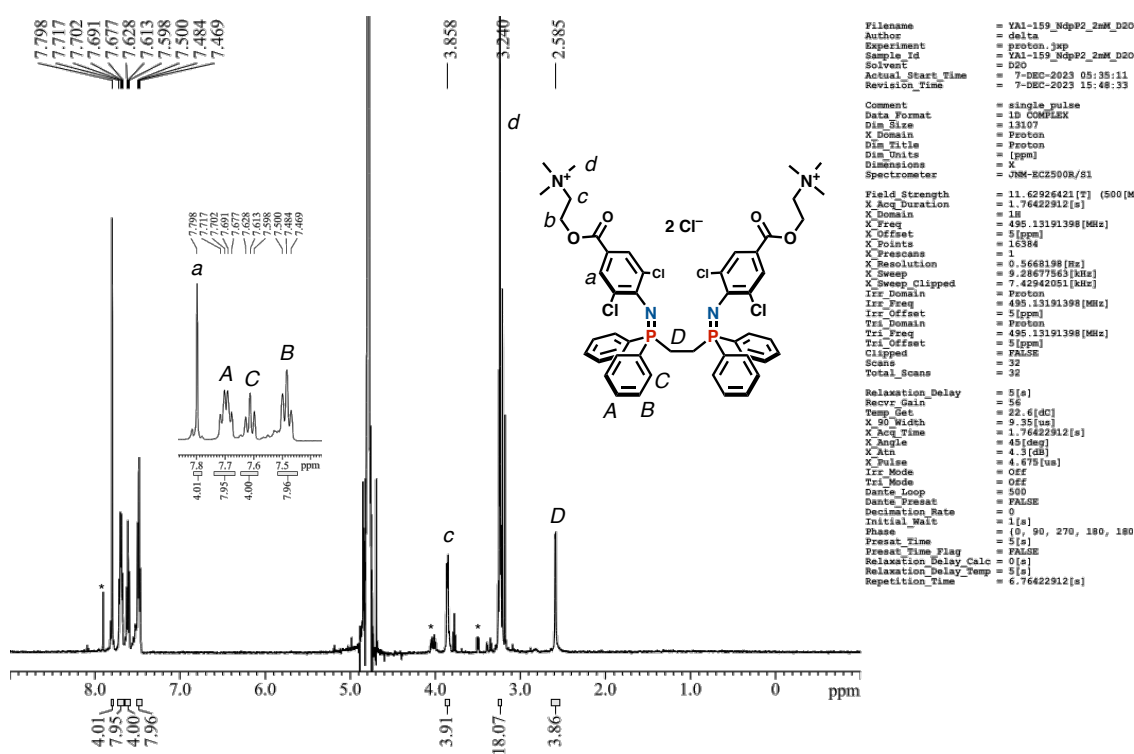

Figure S14.  $^1\text{H}$  NMR spectrum (500 MHz,  $\text{D}_2\text{O}$ , 298 K, 2.0 mM) of NdpP2.

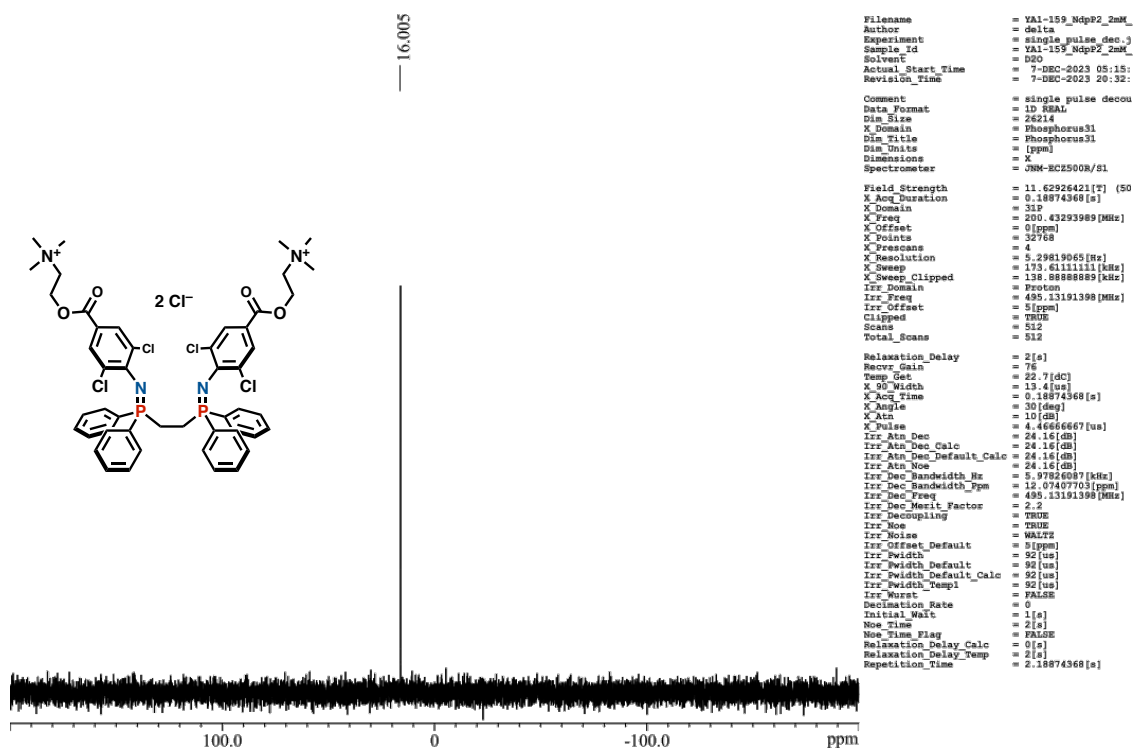

Figure S15.  $^{31}\text{P}$  NMR spectrum (202 MHz,  $\text{D}_2\text{O}$ , 298 K, 2.0 mM) of NdpP2.

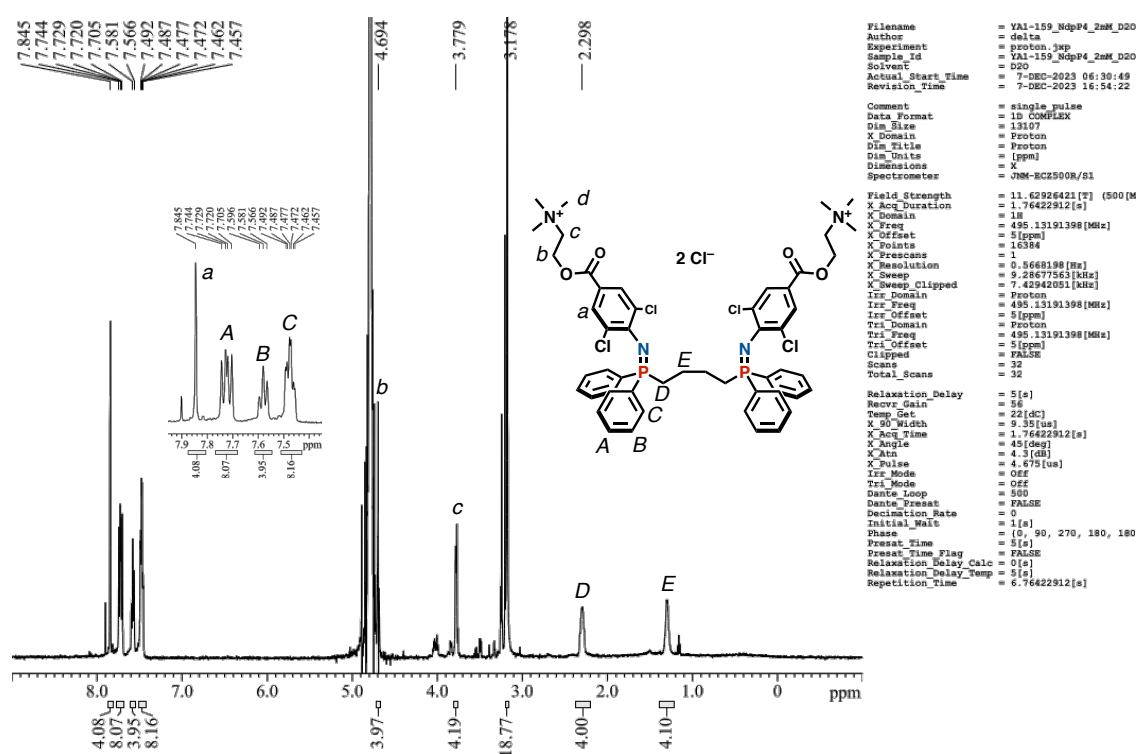

Figure S16.  $^1\text{H}$  NMR spectrum (500 MHz,  $\text{D}_2\text{O}$ , 298 K, 2.0 mM) of NdpP4.

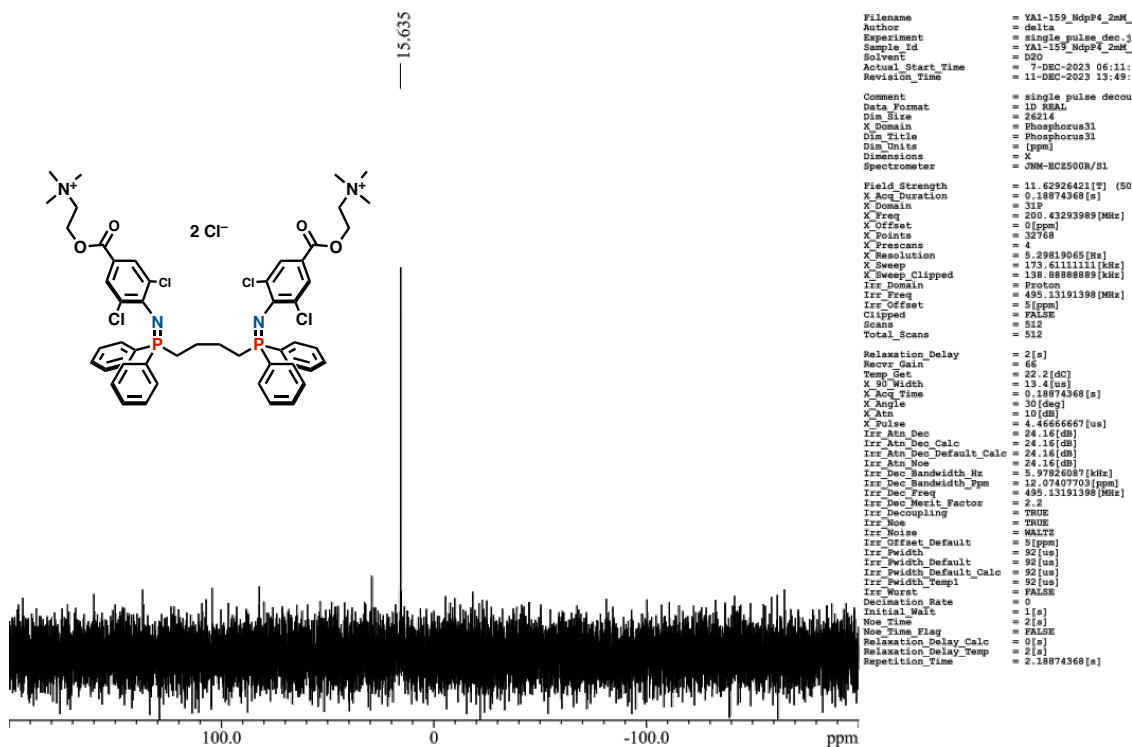

Figure S17.  $^{31}\text{P}$  NMR spectrum (202 MHz,  $\text{D}_2\text{O}$ , 298 K, 2.0 mM) of NdpP4.

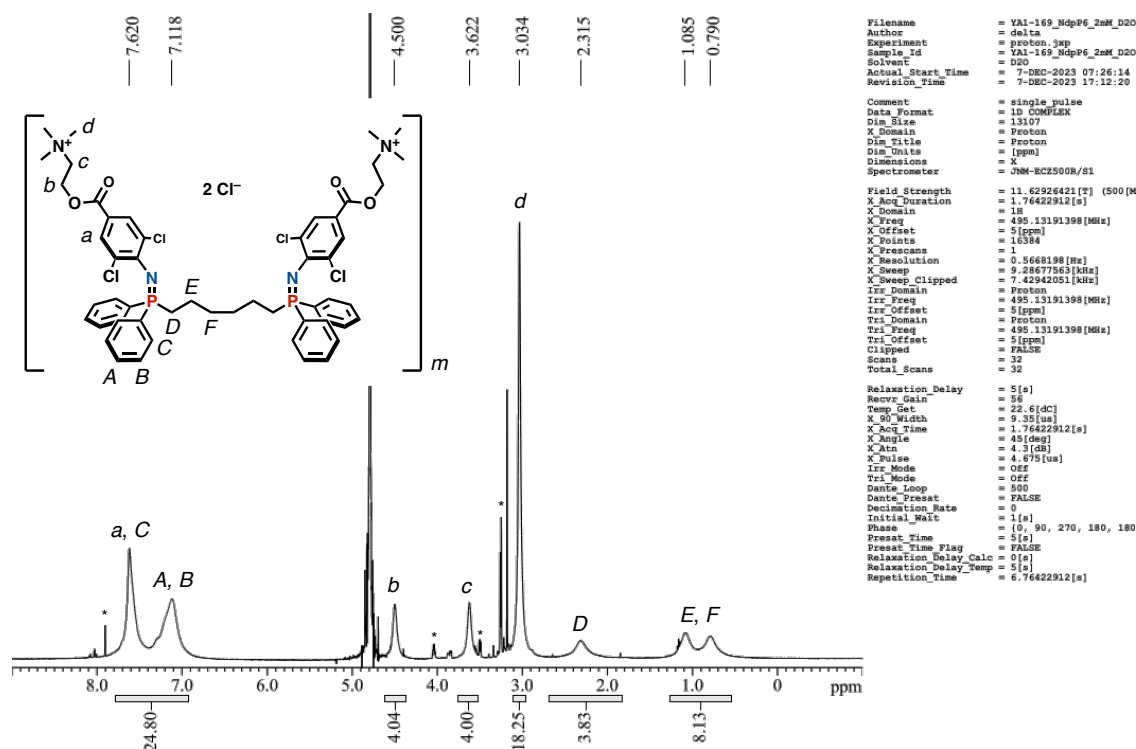

Figure S18. <sup>1</sup>H NMR spectrum (500 MHz, D<sub>2</sub>O, 298 K, 2.0 mM based on NdpP6) of (NdpP6)<sub>m</sub>.

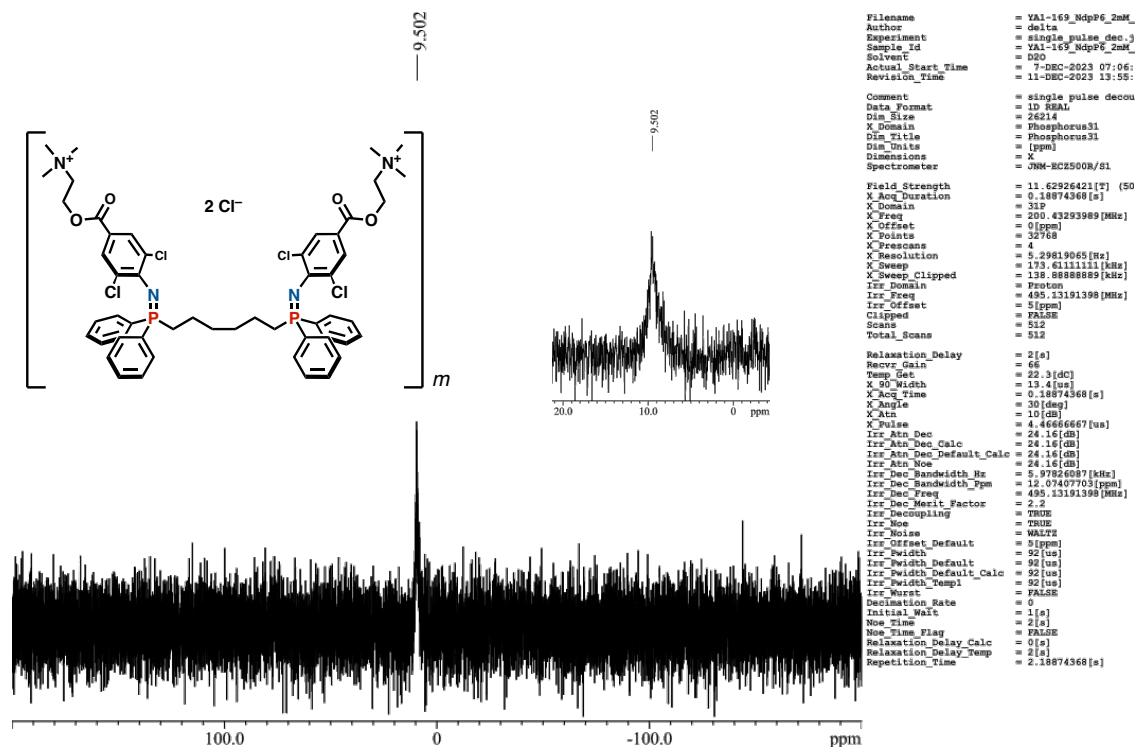

Figure S19. <sup>31</sup>P NMR spectrum (202 MHz, D<sub>2</sub>O, 298 K, 2.0 mM based on NdpP6) of (NdpP6)<sub>m</sub>.

## 6.2. $^1\text{H}$ DOSY spectra

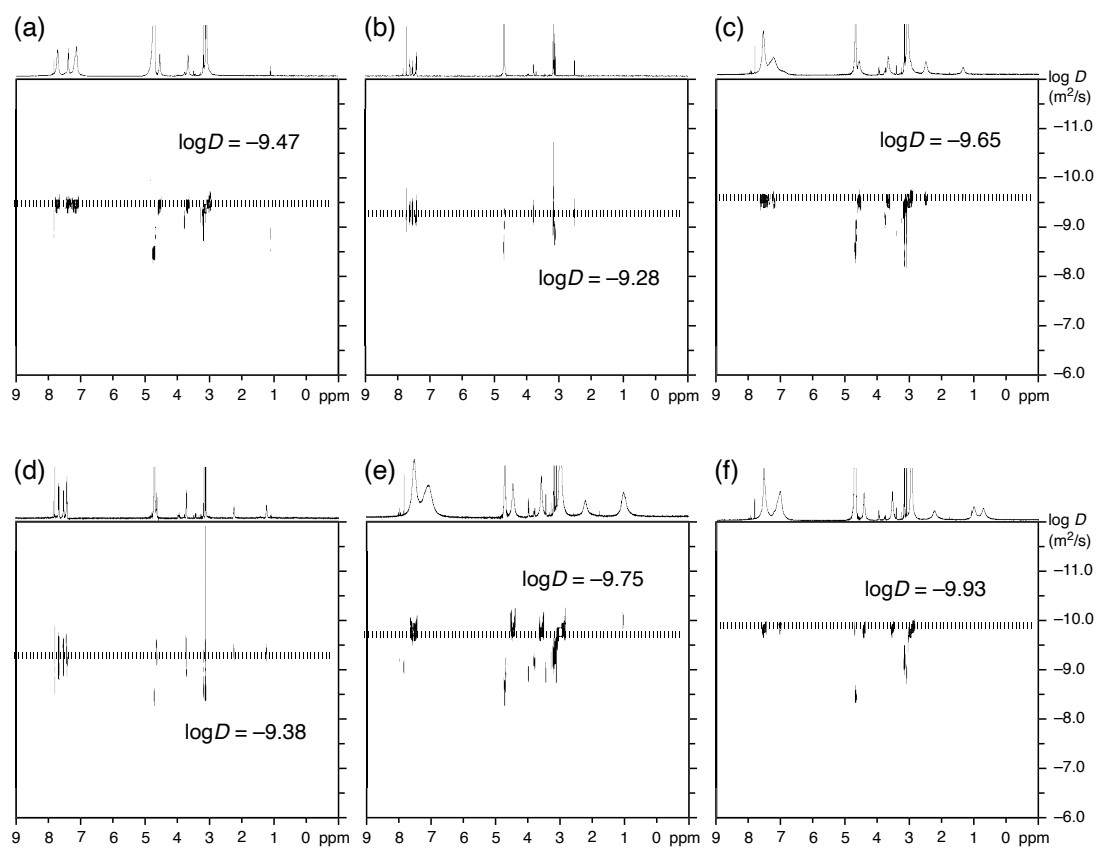

**Figure S20.**  $^1\text{H}$  DOSY spectra (600 MHz,  $\text{D}_2\text{O}$ , 298 K, 2.0 mM based on the amphiphiles) and diffusion coefficients of (a)  $(\text{NdpP1})_m$ , (b)  $(\text{NdpP2})_m$ , (c)  $(\text{NdpP3})_m$ , (d)  $(\text{NdpP4})_m$ , (e)  $(\text{NdpP5})_m$ , and (f)  $(\text{NdpP6})_m$ .

### 6.3. DLS measurements

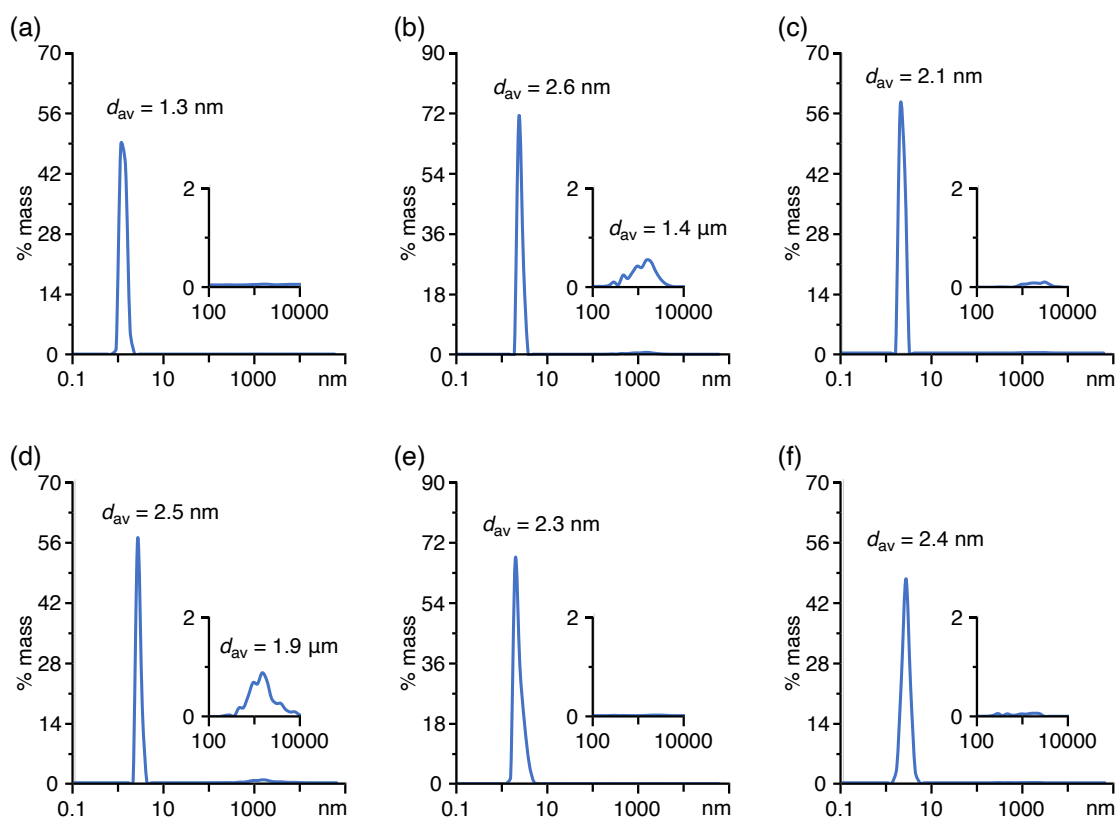

**Figure S21.** DLS charts ( $\text{H}_2\text{O}$ , 298 K, 2.0 mM based on the amphiphiles) of (a)  $(\text{NdpP1})_m$ , (b)  $(\text{NdpP2})_m$ , (c)  $(\text{NdpP3})_m$ , (d)  $(\text{NdpP4})_m$ , (e)  $(\text{NdpP5})_m$ , and (f)  $(\text{NdpP6})_m$ .

#### 6.4. Optimized structures

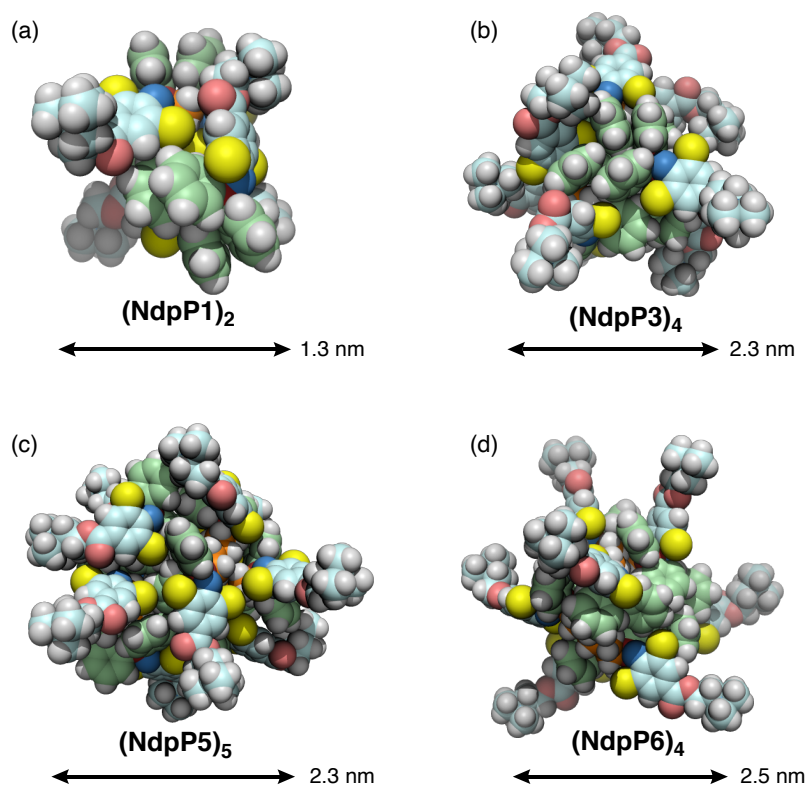

**Figure S22.** Space-filling representations of optimized structures of (a)  $(\text{NdpP1})_2$ , (b)  $(\text{NdpP3})_4$ , (c)  $(\text{NdpP5})_5$  and (d)  $(\text{NdpP6})_4$  (phosphorus (red), nitrogen (blue), oxygen (pink), carbon (green, light blue, and orange), chlorine (yellow)).

## 6.5. Determination of CMC

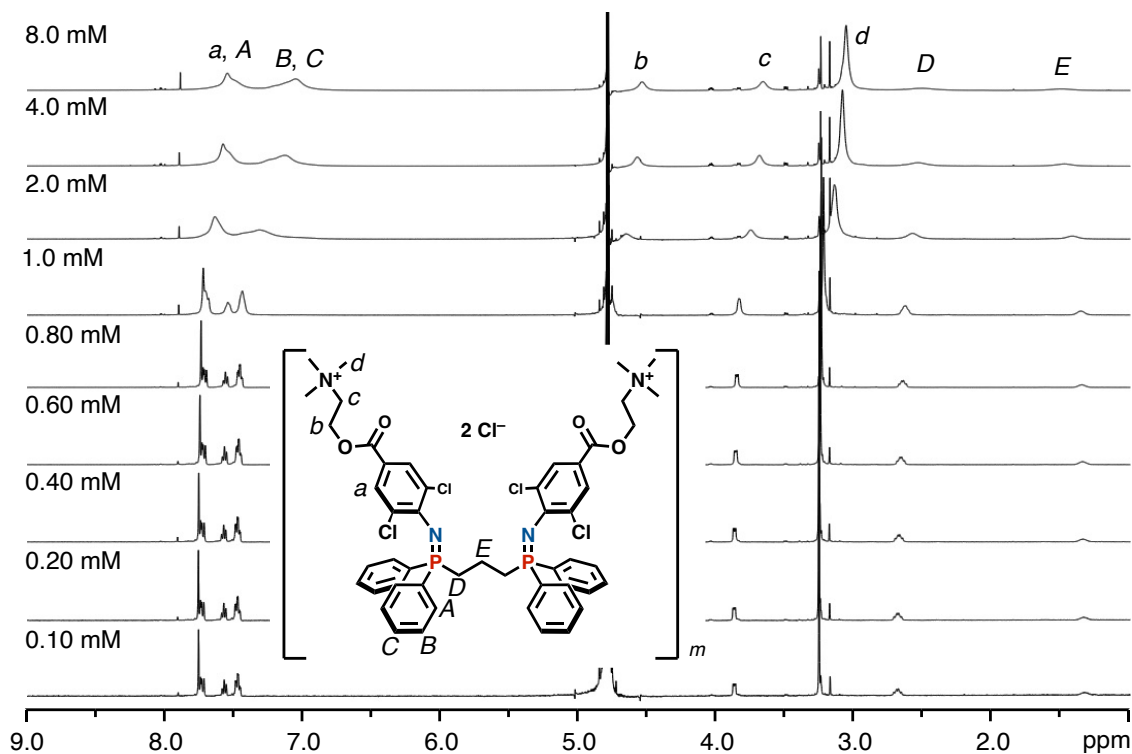

**Figure S23.** Variable concentration  $^1\text{H}$  NMR spectra (500 MHz,  $\text{D}_2\text{O}$ , 298 K) of  $(\text{NdpP3})_m$ .

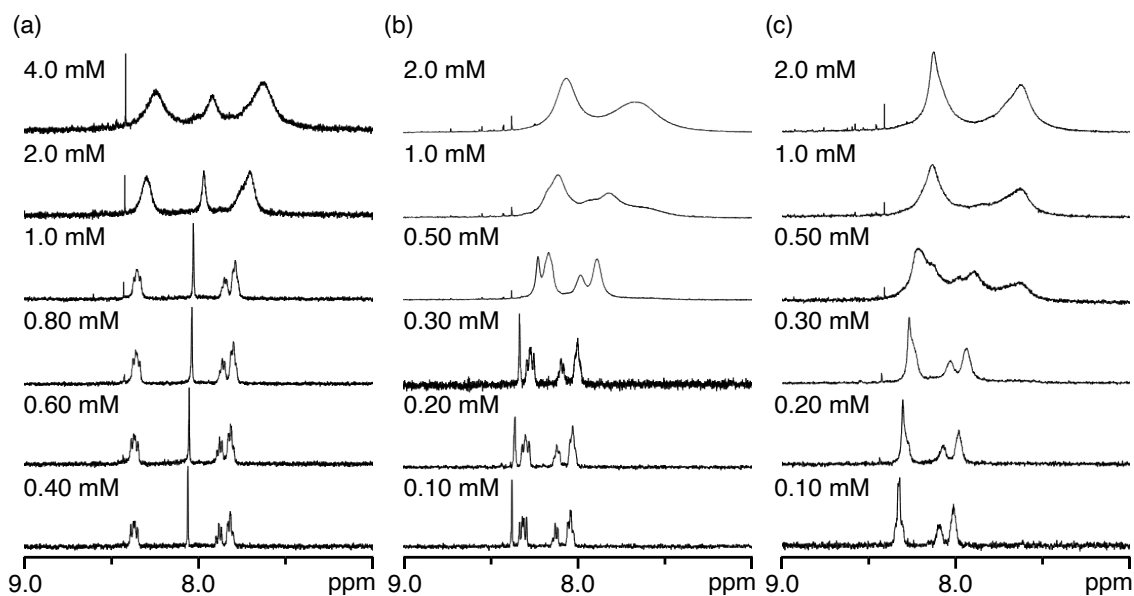

**Figure S24.** Variable concentration  $^1\text{H}$  NMR spectra (500 MHz,  $\text{D}_2\text{O}$ , 298 K) of (a)  $(\text{NdpP1})_m$ , (b)  $(\text{NdpP5})_m$ , and (c)  $(\text{NdpP6})_m$ .

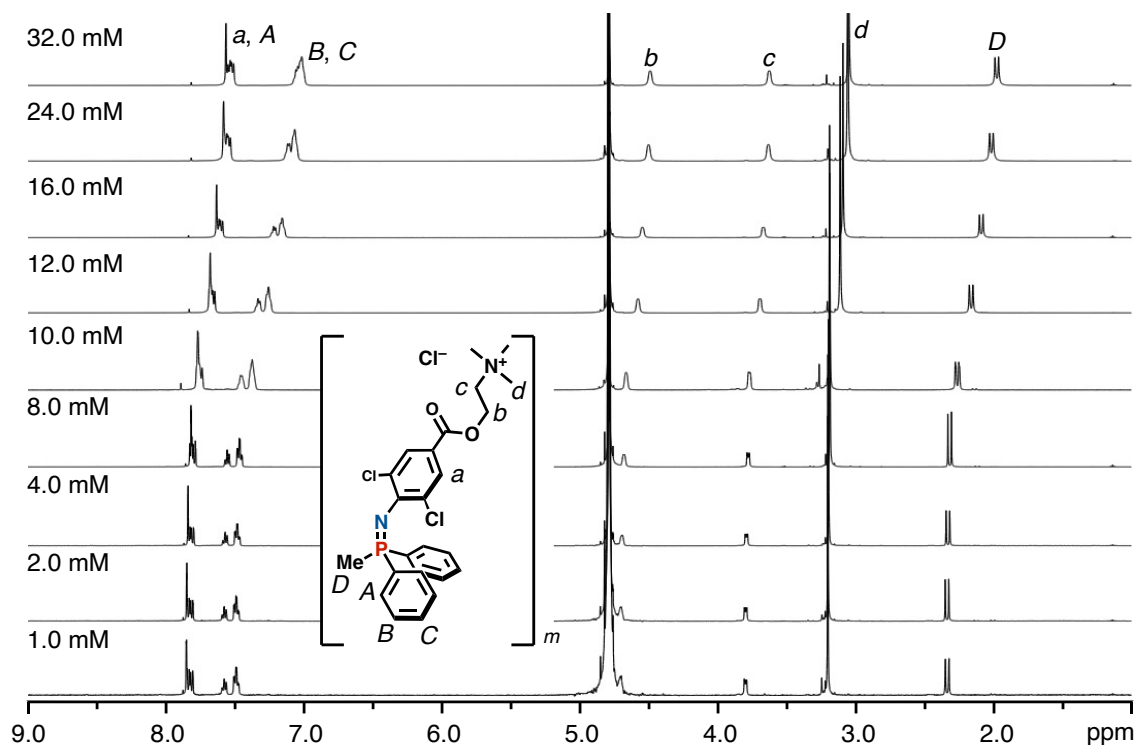

**Figure S25.** Variable concentration  $^1\text{H}$  NMR spectra (500 MHz,  $\text{D}_2\text{O}$ , 298 K) of  $(\text{NPPh2Me})_m$ .

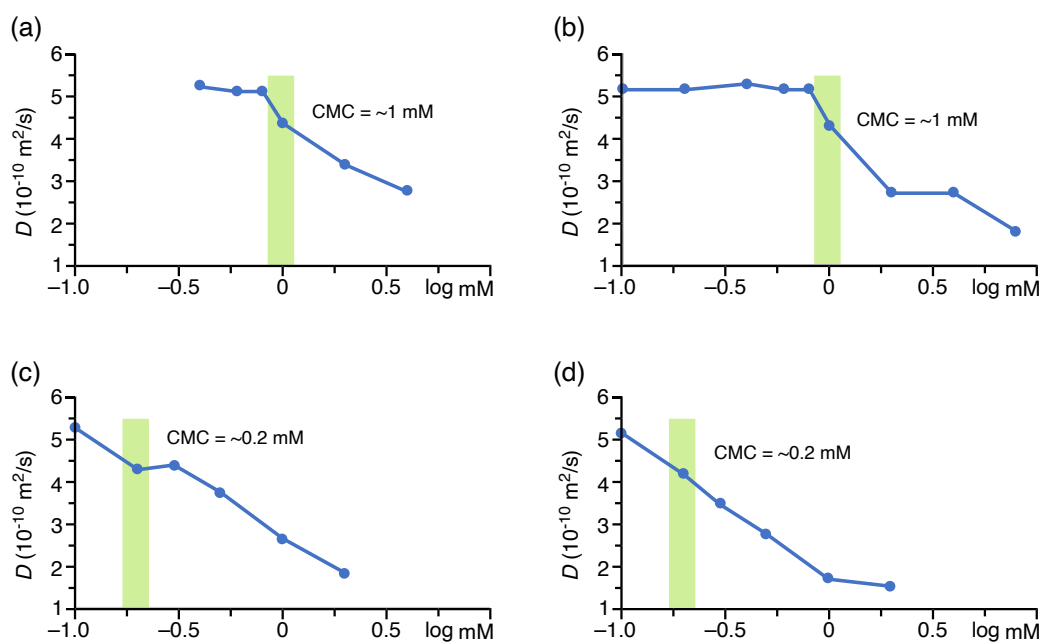

**Figure S26.** Concentration-dependent diffusion constants ( $D$ ) of (a) **NdpP1**, (b) **NdpP3**, (c) **NdpP5**, and (d) **NdpP6**.



## 6.6. PXRD analyses

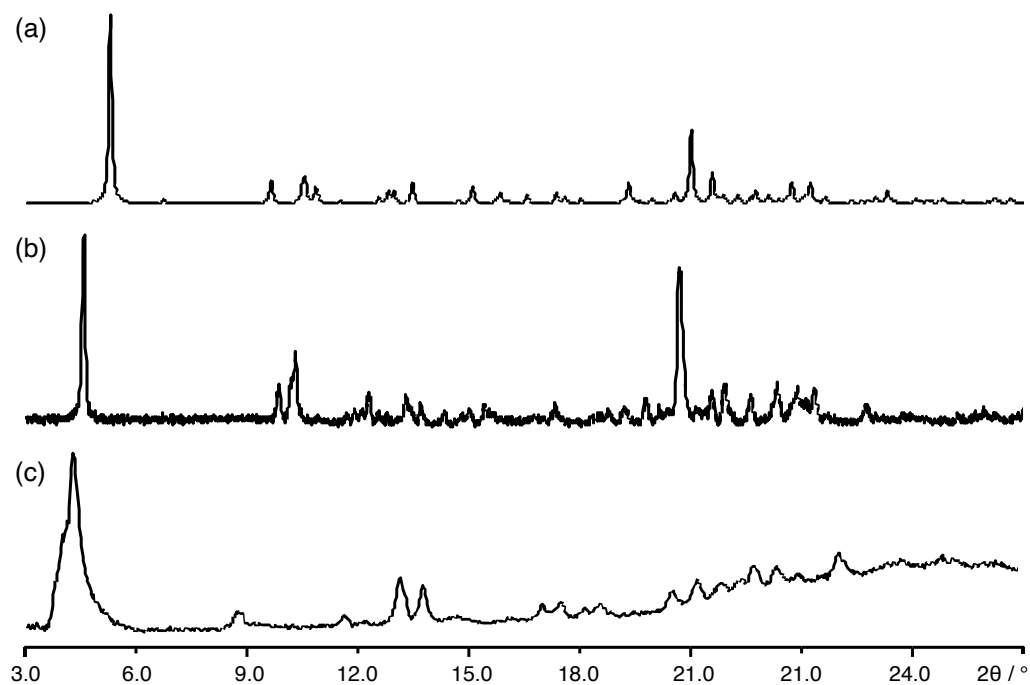

**Figure S27.** Powder X-ray diffraction (PXRD) patterns of (a) simulation based on the result of single crystal X-ray diffraction (SXRD) of **NdP2** and white dispersions of (b) **NdP2** and (c) **NdP4**.

## 6.7. AFM and TEM images

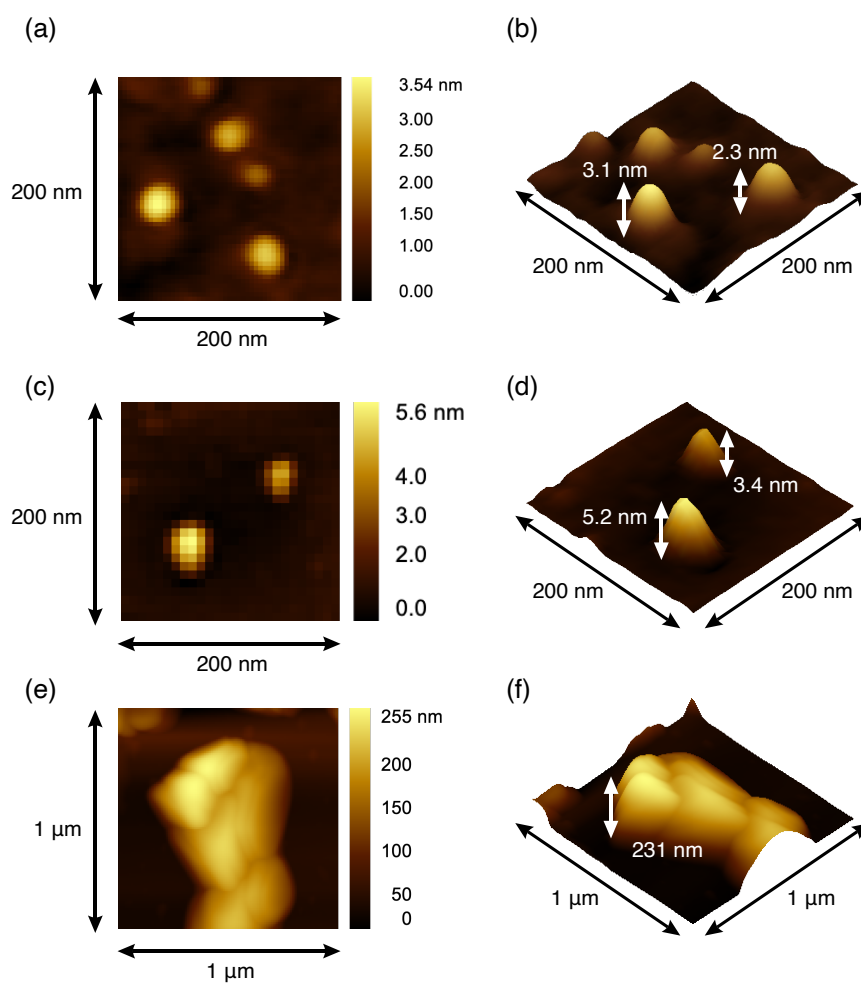

**Figure S28.** AFM images of (a,b) **NdpP3** and (c–f) white dispersions of **NdpP2**. (c,d) Local and (e,f) wide-area observations.

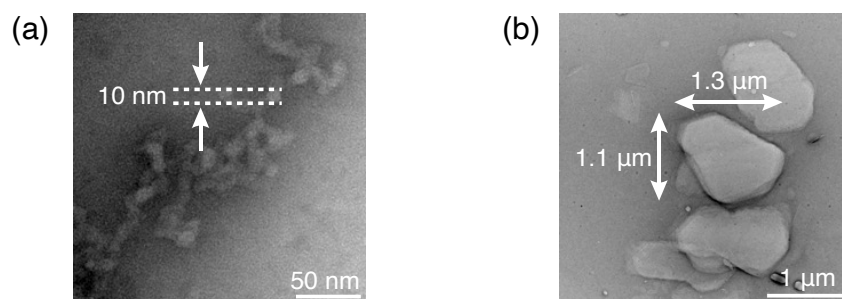

**Figure S29.** TEM images of white dispersions of **NdpP2**. (a) Local and (b) wide-area observations.

## 7. Host-guest chemistry

### 7.1. Encapsulation of hydrophobic organic molecules

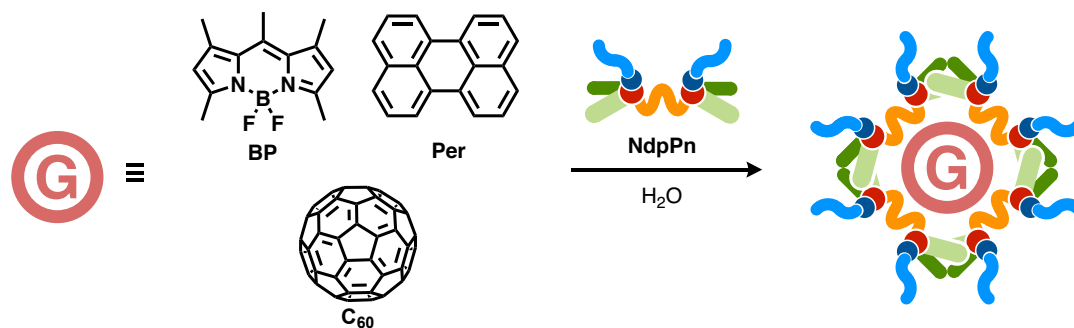

A hydrophobic aromatic compound (4.0  $\mu\text{mol}$ ) and gemini amphiphile **NdpPn** (4.0  $\mu\text{mol}$ ) or monomeric amphiphile **NPPh2Me** (8.0  $\mu\text{mol}$ ) were ground in a mortar for 3 min and subsequently H<sub>2</sub>O (2.0 mL) was added. The suspension was vigorously stirred for 1 h at room temperature. The excess of guests was removed by filtration. The formation of host-guest complexes was confirmed by NMR, UV-vis, fluorescence, and DLS analyses with an appropriately diluted solution.

## 7.2. UV-vis and fluorescence spectra

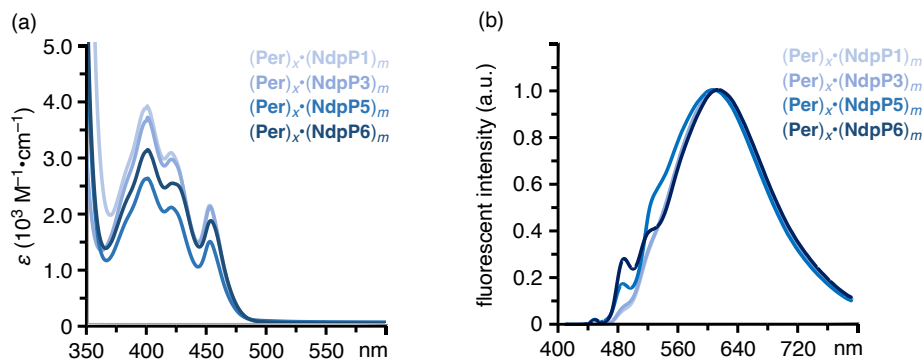

**Figure S30.** (a) UV-vis and (b) fluorescence spectra ( $\text{H}_2\text{O}$ , 298 K, 2.0 mM based on the amphiphiles) of  $(\text{Per})_x \bullet (\text{NdpP1})_m$ ,  $(\text{Per})_x \bullet (\text{NdpP3})_m$ ,  $(\text{Per})_x \bullet (\text{NdpP5})_m$ , and  $(\text{Per})_x \bullet (\text{NdpP6})_m$ .

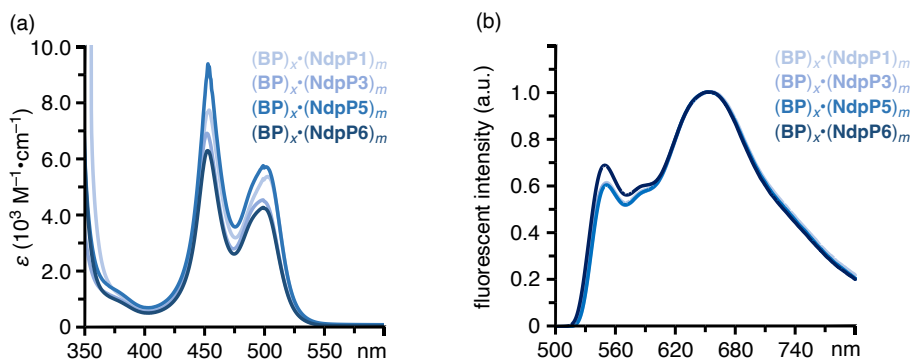

**Figure S31.** (a) UV-vis and (b) fluorescence spectra ( $\text{H}_2\text{O}$ , 298 K, 2.0 mM based on the amphiphiles) of  $(\text{BP})_x \bullet (\text{NdpP1})_m$ ,  $(\text{BP})_x \bullet (\text{NdpP3})_m$ ,  $(\text{BP})_x \bullet (\text{NdpP5})_m$ , and  $(\text{BP})_x \bullet (\text{NdpP6})_m$ .

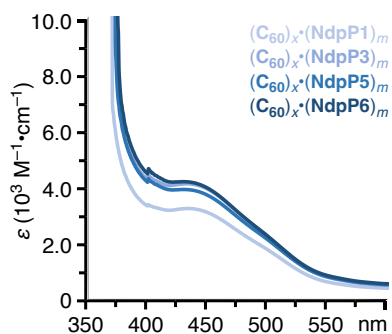

**Figure S32.** UV-vis spectra ( $\text{H}_2\text{O}$ , 298 K, 2.0 mM based on the amphiphiles) of  $(\text{C}_{60})_x \bullet (\text{NdpP1})_m$ ,  $(\text{C}_{60})_x \bullet (\text{NdpP3})_m$ ,  $(\text{C}_{60})_x \bullet (\text{NdpP5})_m$ , and  $(\text{C}_{60})_x \bullet (\text{NdpP6})_m$ .

**Table S3.** Photophysical data of (a)  $(\text{Per})_x \cdot (\text{NdpPn})_m$ , (b)  $(\text{BP})_x \cdot (\text{NdpPn})_m$ , and (c)  $(\text{C}_{60})_x \cdot (\text{NdpPn})_m$  ( $n = 1, 3, 5, 6$ ) ( $\text{H}_2\text{O}$ , 298 K).

| (a)          |            |                                    |                                   | (b)          |           |                                    |                                   |
|--------------|------------|------------------------------------|-----------------------------------|--------------|-----------|------------------------------------|-----------------------------------|
| amphiphile   | guest      | $\lambda_{\text{max}} / \text{nm}$ | $\lambda_{\text{em}} / \text{nm}$ | amphiphile   | guest     | $\lambda_{\text{max}} / \text{nm}$ | $\lambda_{\text{em}} / \text{nm}$ |
| <b>NdpP1</b> | <b>Per</b> | 401/421/453                        | 608                               | <b>NdpP1</b> | <b>BP</b> | 455/500                            | 551/655                           |
| <b>NdpP3</b> | <b>Per</b> | 401/421/453                        | 610                               | <b>NdpP3</b> | <b>BP</b> | 453/500                            | 550/655                           |
| <b>NdpP5</b> | <b>Per</b> | 401/421/453                        | 421/486/605                       | <b>NdpP5</b> | <b>BP</b> | 454/500                            | 551/651                           |
| <b>NdpP6</b> | <b>Per</b> | 401/422/454                        | 418/487/611                       | <b>NdpP6</b> | <b>BP</b> | 453/500                            | 551/638                           |

  

| (c)          |                       |                                    |                                   |
|--------------|-----------------------|------------------------------------|-----------------------------------|
| amphiphile   | guest                 | $\lambda_{\text{max}} / \text{nm}$ | $\lambda_{\text{em}} / \text{nm}$ |
| <b>NdpP1</b> | <b>C<sub>60</sub></b> | 433                                | —                                 |
| <b>NdpP3</b> | <b>C<sub>60</sub></b> | 434                                | —                                 |
| <b>NdpP5</b> | <b>C<sub>60</sub></b> | 430                                | —                                 |
| <b>NdpP6</b> | <b>C<sub>60</sub></b> | 429                                | —                                 |

### 7.3. DLS measurements

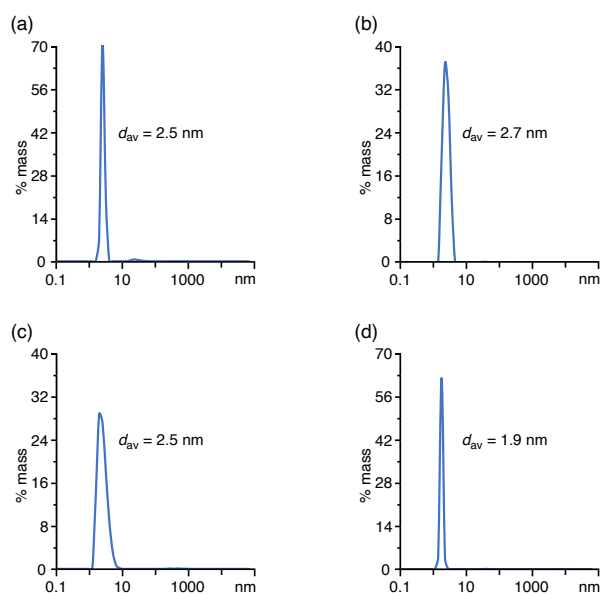

**Figure S33.** DLS charts ( $\text{H}_2\text{O}$ , 298 K, 2.0 mM based on the amphiphiles) and average diameters of (a)  $(\text{Per})_x \bullet (\text{NdpP1})_m$ , (b)  $(\text{Per})_x \bullet (\text{NdpP3})_m$ , (c)  $(\text{Per})_x \bullet (\text{NdpP5})_m$ , and (d)  $(\text{Per})_x \bullet (\text{NdpP6})_m$ .

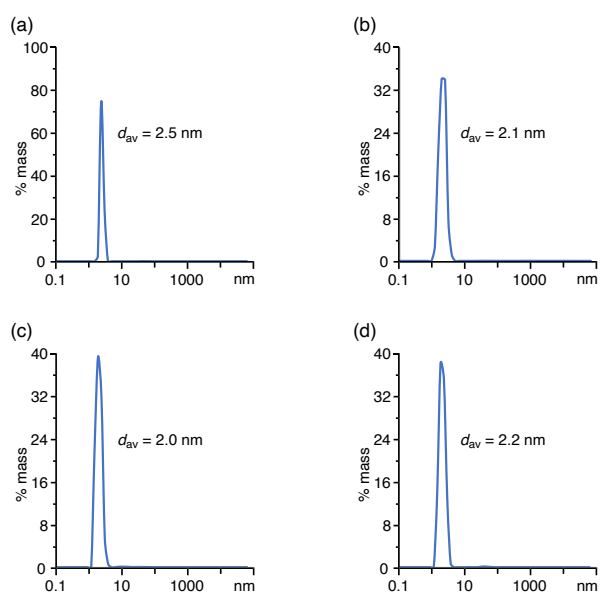

**Figure S34.** DLS charts ( $\text{H}_2\text{O}$ , 298 K, 2.0 mM based on the amphiphiles) and average diameters of (a)  $(\text{BP})_x \bullet (\text{NdpP1})_m$ , (b)  $(\text{BP})_x \bullet (\text{NdpP3})_m$ , (c)  $(\text{BP})_x \bullet (\text{NdpP5})_m$ , and (d)  $(\text{BP})_x \bullet (\text{NdpP6})_m$ .

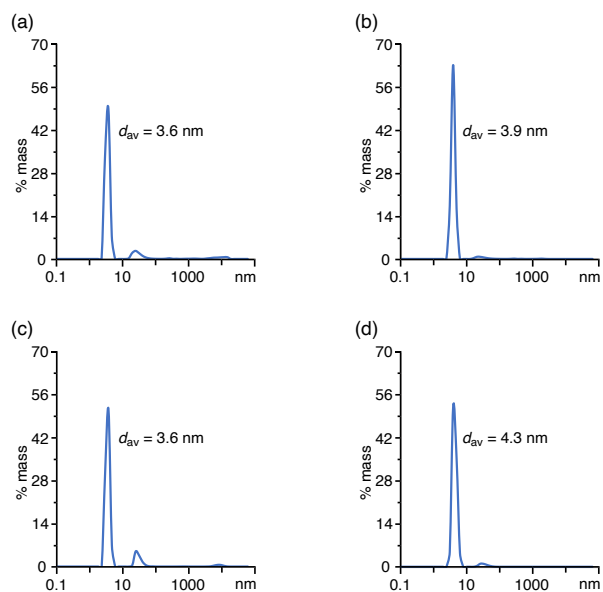

**Figure S35.** DLS charts (H<sub>2</sub>O, 298 K, 2.0 mM based on the amphiphiles) and average diameters of (a)  $(C_{60})_x \cdot (NdpP1)_m$ , (b)  $(C_{60})_x \cdot (NdpP3)_m$ , (c)  $(C_{60})_x \cdot (NdpP5)_m$ , and (d)  $(C_{60})_x \cdot (NdpP6)_m$ .

## 7.4. Evaluation of uptake quantity

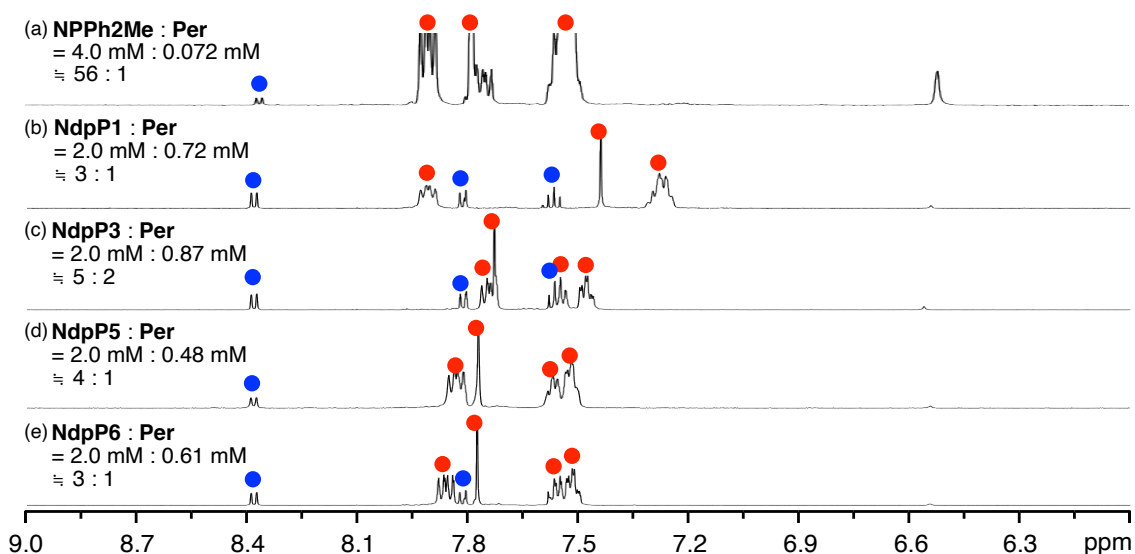

**Figure S36.**  $^1\text{H}$  NMR spectra (500 MHz, 298 K,  $\text{DMSO-}d_6$ ) of (a)  $(\text{Per})_x \cdot (\text{NPPH2Me})_m$ , (b)  $(\text{Per})_x \cdot (\text{NdpP1})_m$ , (c)  $(\text{Per})_x \cdot (\text{NdpP3})_m$ , (d)  $(\text{Per})_x \cdot (\text{NdpP5})_m$ , and (e)  $(\text{Per})_x \cdot (\text{NdpP6})_m$ . Aqueous solution of host-guest complexes was evaporated and then the residue was dissolved in  $\text{DMSO-}d_6$  (red: amphiphiles and blue: **Per**).

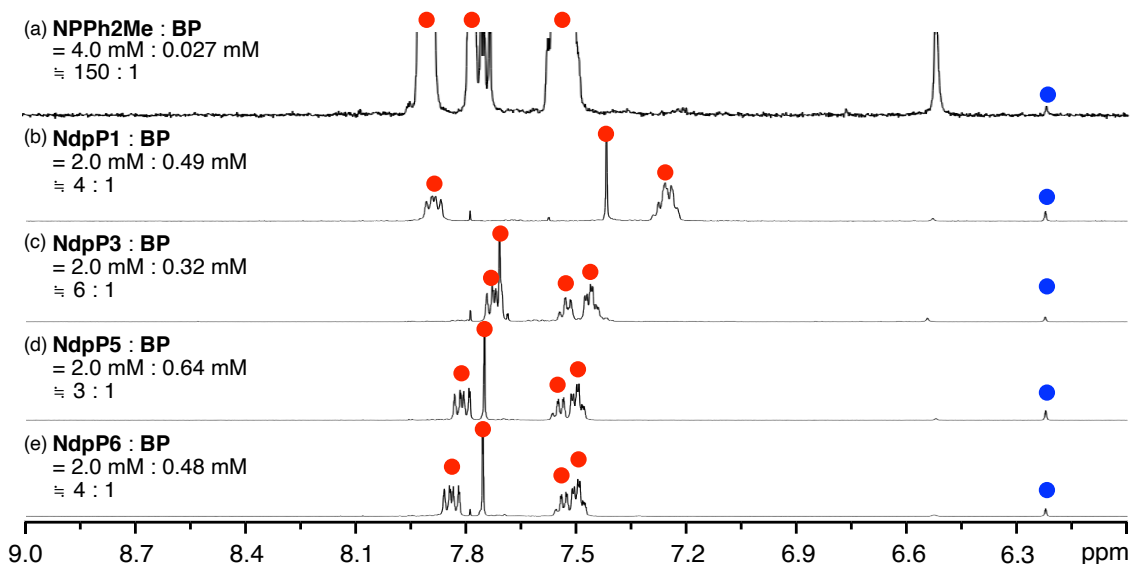

**Figure S37.**  $^1\text{H}$  NMR spectra (500 MHz, 298 K,  $\text{DMSO-}d_6$ ) of (a)  $(\text{BP})_x \cdot (\text{NPPH2Me})_m$ , (b)  $(\text{BP})_x \cdot (\text{NdpP1})_m$ , (c)  $(\text{BP})_x \cdot (\text{NdpP3})_m$ , (d)  $(\text{BP})_x \cdot (\text{NdpP5})_m$ , and (e)  $(\text{BP})_x \cdot (\text{NdpP6})_m$ . Aqueous solution of host-guest complexes was evaporated and then the residue was dissolved in  $\text{DMSO-}d_6$  (red: amphiphiles and blue: **BP**).



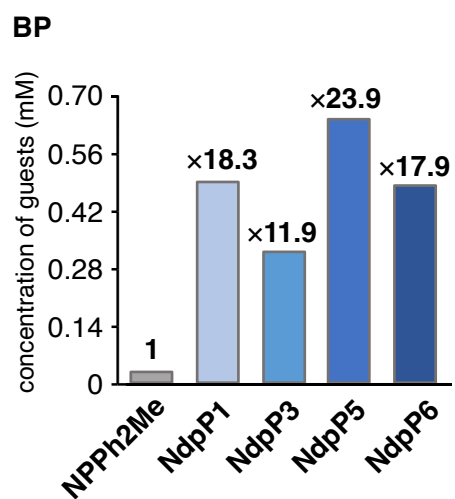

**Figure S38.** Comparisons of uptake quantity of **BP** by **NPPh2Me** and **NdPn** ( $n = 1, 3, 5, 6$ ). The number on the bar indicates relative uptake ratio to **NPPh2Me**.

## 7.5. Optimized structures

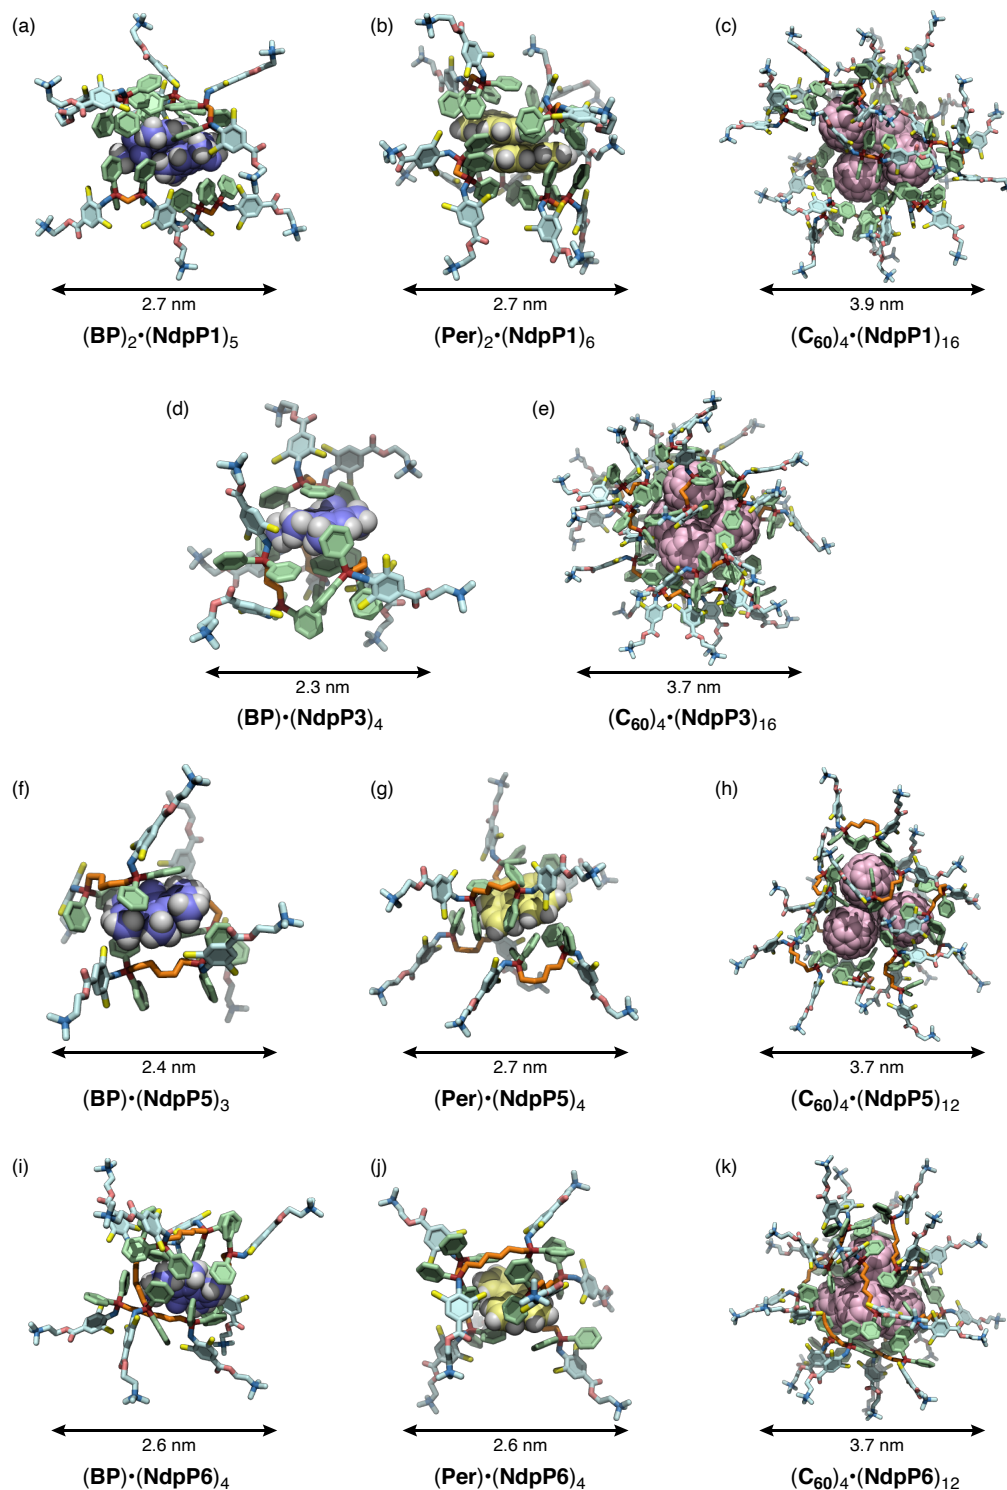

**Figure S 39 .** Optimized structures of (a)  $(BP)_2 \bullet (NdpP1)_5$ , (b)  $(Per)_2 \bullet (NdpP1)_6$ , (c)  $(C_{60})_4 \bullet (NdpP1)_{16}$ , (d)  $(BP) \bullet (NdpP3)_4$ , (e)  $(C_{60})_4 \bullet (NdpP3)_{16}$ , (f)  $(BP) \bullet (NdpP5)_3$ , (g)  $(Per) \bullet (NdpP5)_4$ , (h)  $(C_{60})_4 \bullet (NdpP5)_{12}$ , (i)  $(BP) \bullet (NdpP6)_4$ , (j)  $(Per) \bullet (NdpP6)_4$ , (k)  $(C_{60})_4 \bullet (NdpP6)_{12}$ , estimated by molecular mechanics calculation.



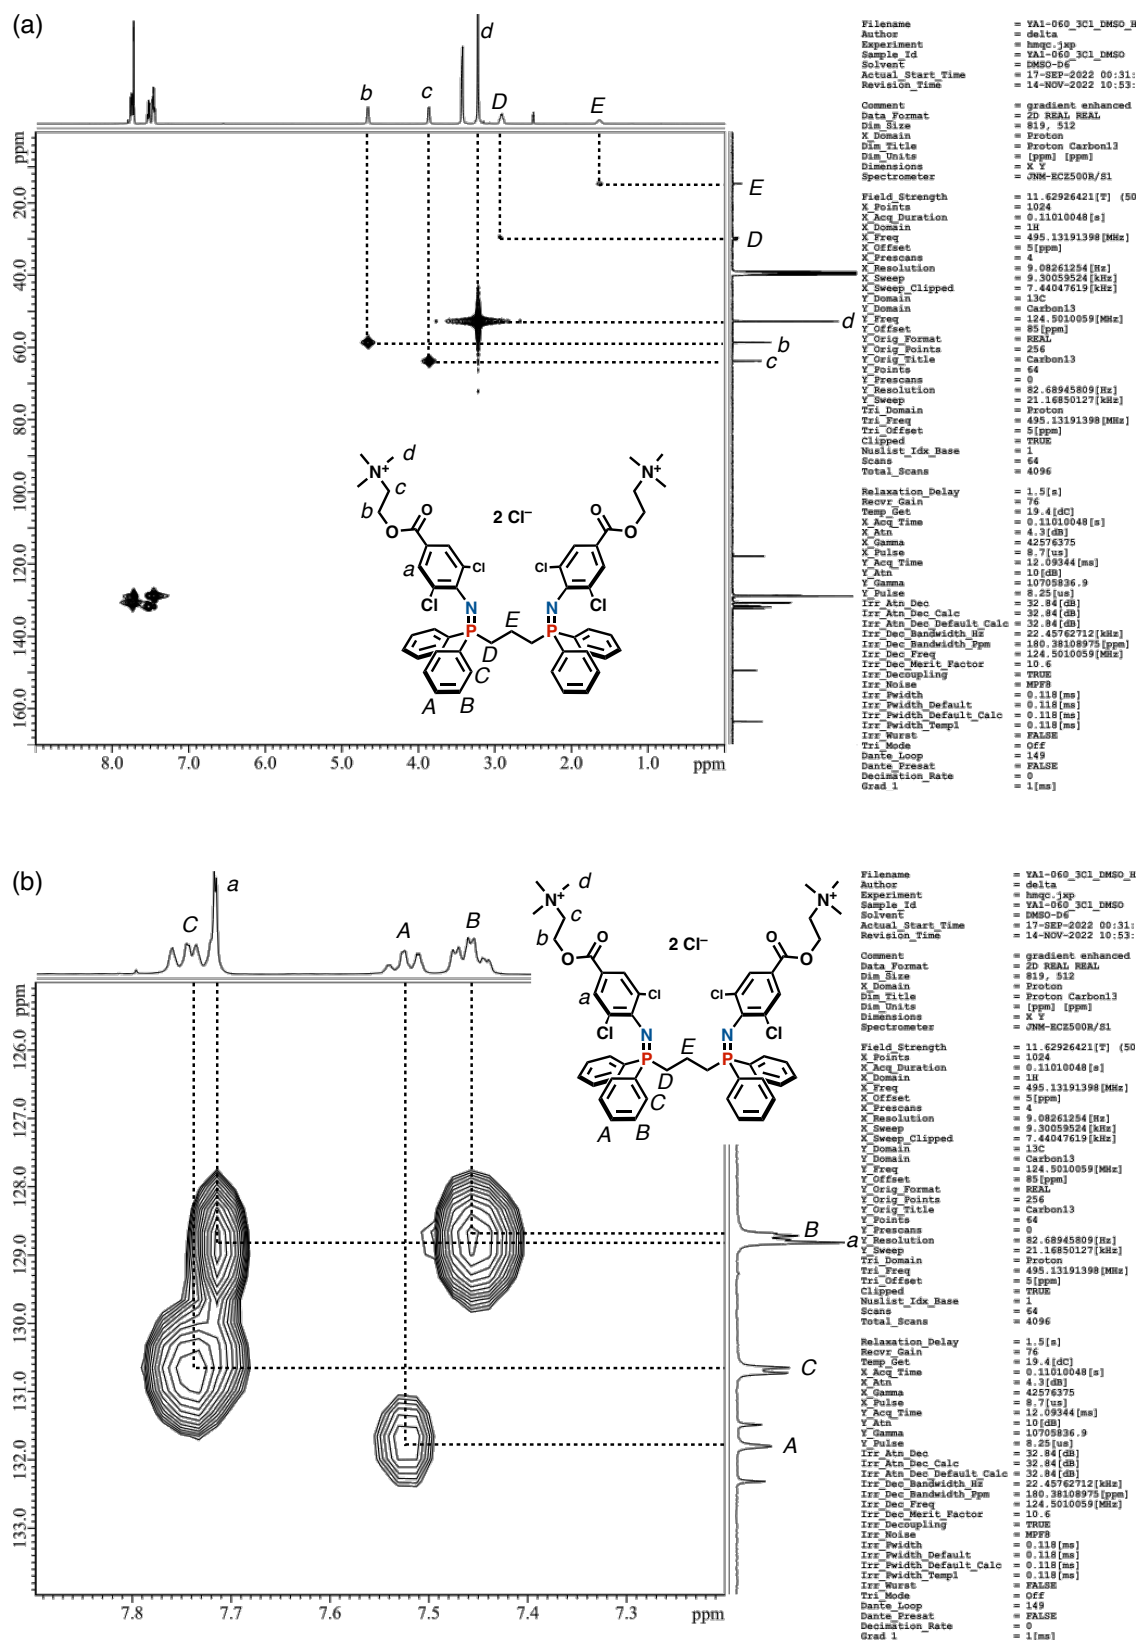

**Figure S42.** HMQC NMR spectrum (500 MHz, DMSO- $d_6$ , 298 K) of NdpP3. (a) Wide region and (b) its aromatic region.

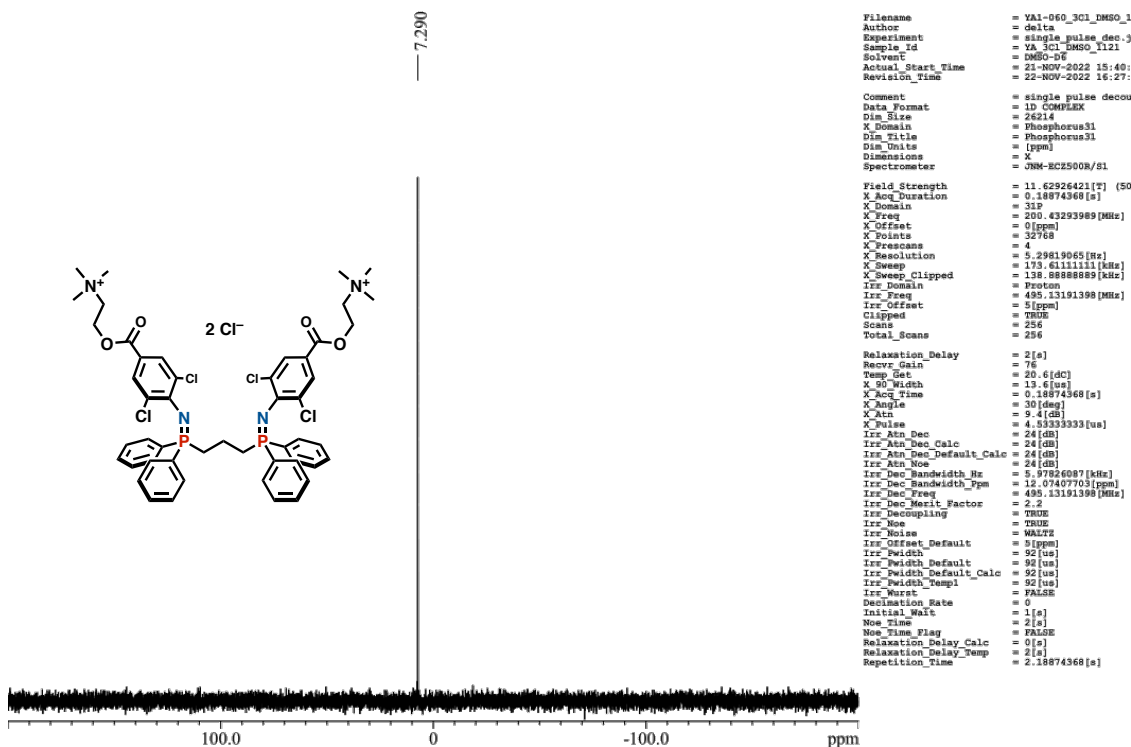

Figure S43.  $^{31}\text{P}$  NMR spectrum (202 MHz,  $\text{DMSO-}d_6$ , 298 K) of NdpP3.

## Display Report

### Analysis Info

Analysis Name: D:\Data\ofcbunsek\irai\2023\toyota\_lab\yamashina\231019\NdpP3-000001.d  
 Method: esi\_posi\_low.m  
 Sample Name: NdpP3-  
 Comment:

Acquisition Date: 2023/10/19 10:11:25

Operator: BDAL@DE  
 Instrument: micrOTOF 213750.10321

### Acquisition Parameter

|             |            |                      |          |                  |           |
|-------------|------------|----------------------|----------|------------------|-----------|
| Source Type | ESI        | Ion Polarity         | Positive | Set Nebulizer    | 0.3 Bar   |
| Focus       | Not active |                      |          | Set Dry Heater   | 180 °C    |
| Scan Begin  | 50 m/z     | Set Capillary        | 4500 V   | Set Dry Gas      | 4.0 l/min |
| Scan End    | 1500 m/z   | Set End Plate Offset | -500 V   | Set Divert Valve | Waste     |

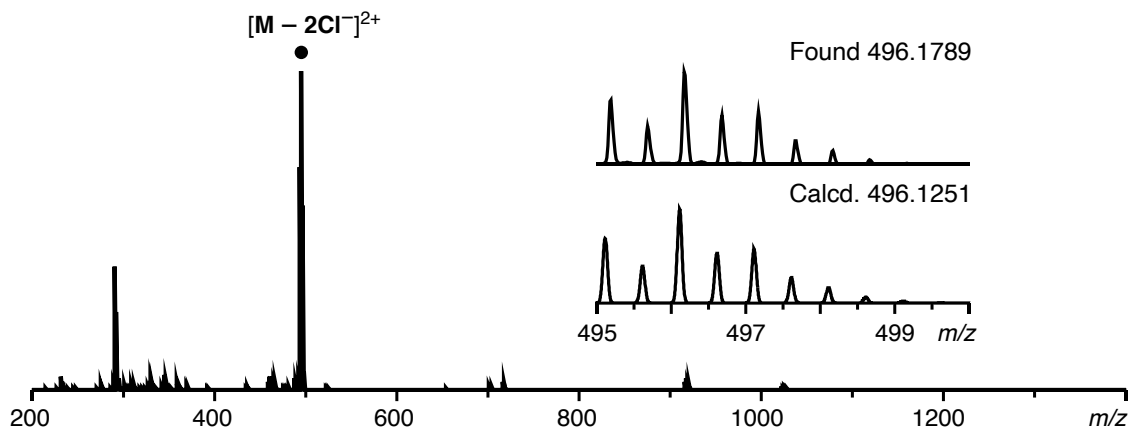

Figure S44. ESI-TOF MS spectrum ( $\text{CH}_3\text{OH}/\text{CH}_3\text{CN}$ ) of NdpP3.

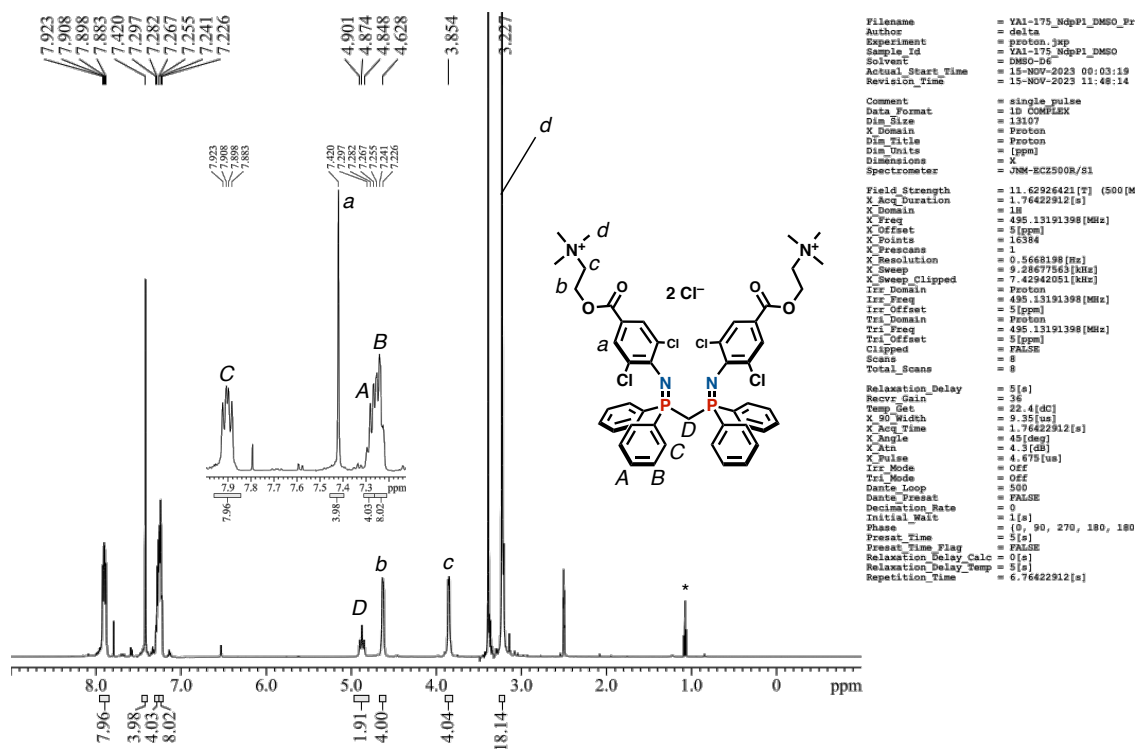

Figure S45.  $^1\text{H}$  NMR spectrum (500 MHz,  $\text{DMSO}-d_6$ , 298 K) of NdP1 (\*: diethyl ether).

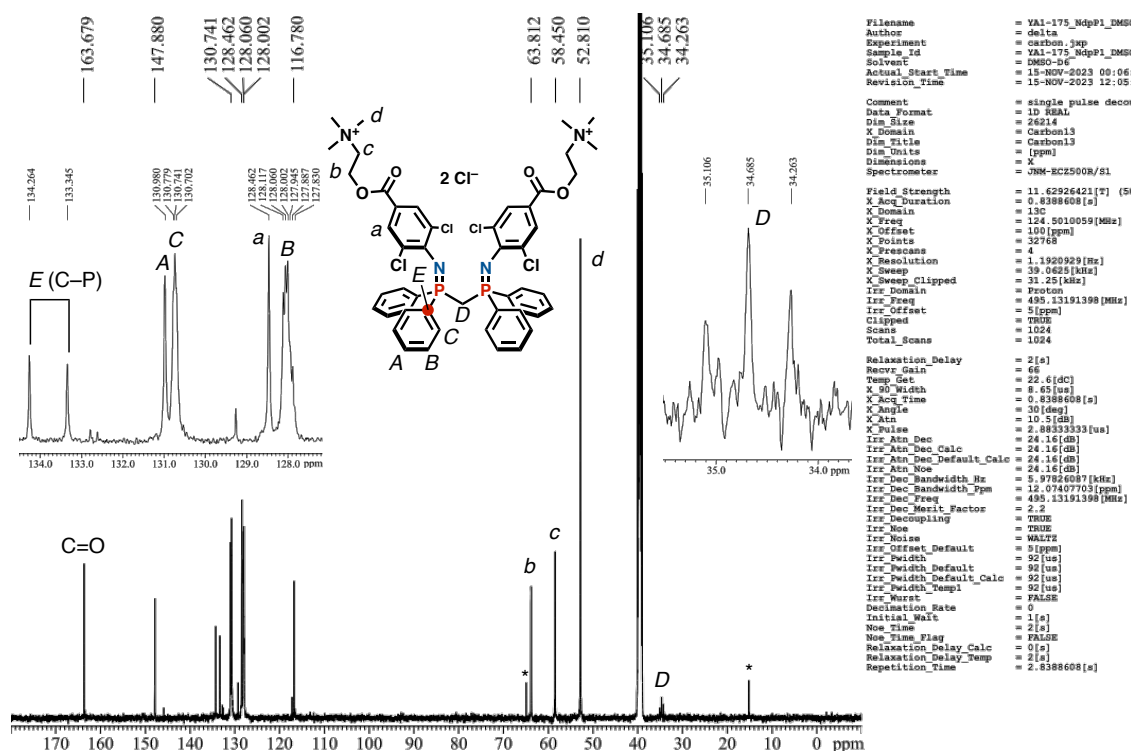

Figure S46.  $^{13}\text{C}$  NMR spectrum (125 MHz,  $\text{DMSO}-d_6$ , 298 K) of NdP1 (\*: diethyl ether).

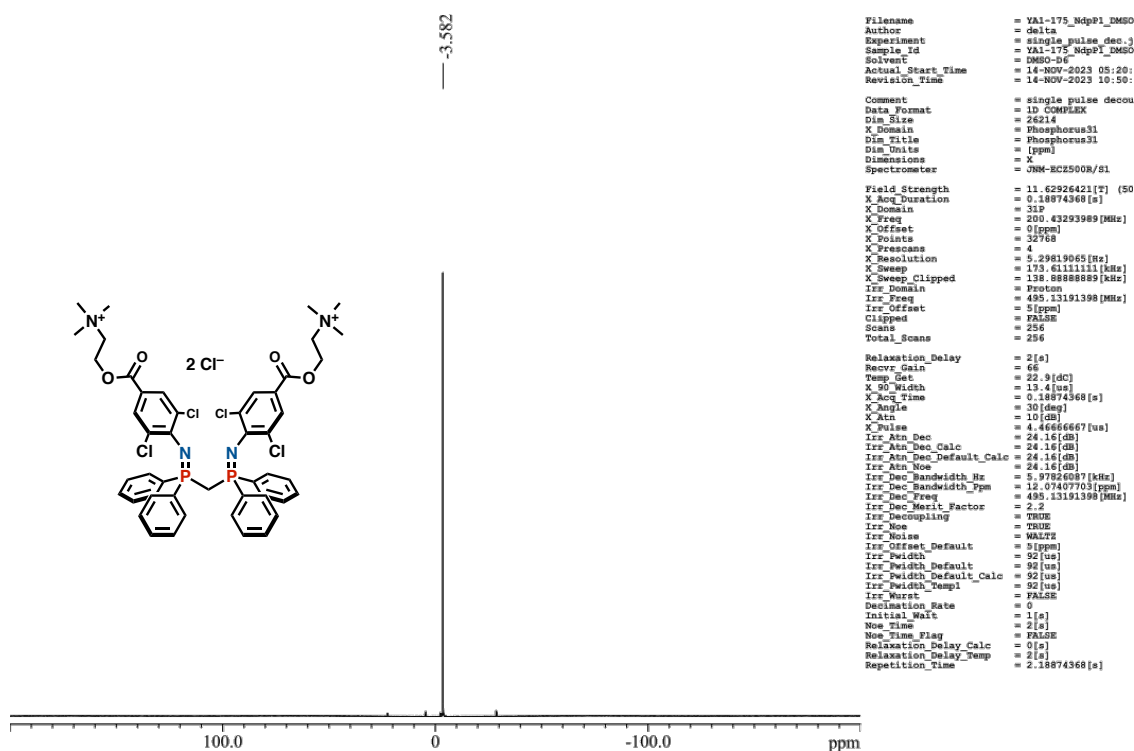

Figure S47. <sup>31</sup>P NMR spectrum (202 MHz, DMSO-*d*<sub>6</sub>, 298 K) of NdpP1.

## Display Report

### Analysis Info

Analysis Name: D:\Data\ofcbunseki\irai\2023\toyota\_lab\yamashina\231019\NdpP1-000001.d  
 Method: esi\_posi\_low.m  
 Sample Name: NdpP1-  
 Comment:

Acquisition Date: 2023/10/19 9:46:36

Operator: BDAL@DE

Instrument: micrOTOF 213750.10321

### Acquisition Parameter

|             |            |                      |          |                  |           |
|-------------|------------|----------------------|----------|------------------|-----------|
| Source Type | ESI        | Ion Polarity         | Positive | Set Nebulizer    | 0.3 Bar   |
| Focus       | Not active |                      |          | Set Dry Heater   | 180 °C    |
| Scan Begin  | 50 m/z     | Set Capillary        | 4500 V   | Set Dry Gas      | 4.0 l/min |
| Scan End    | 1500 m/z   | Set End Plate Offset | -500 V   | Set Divert Valve | Waste     |

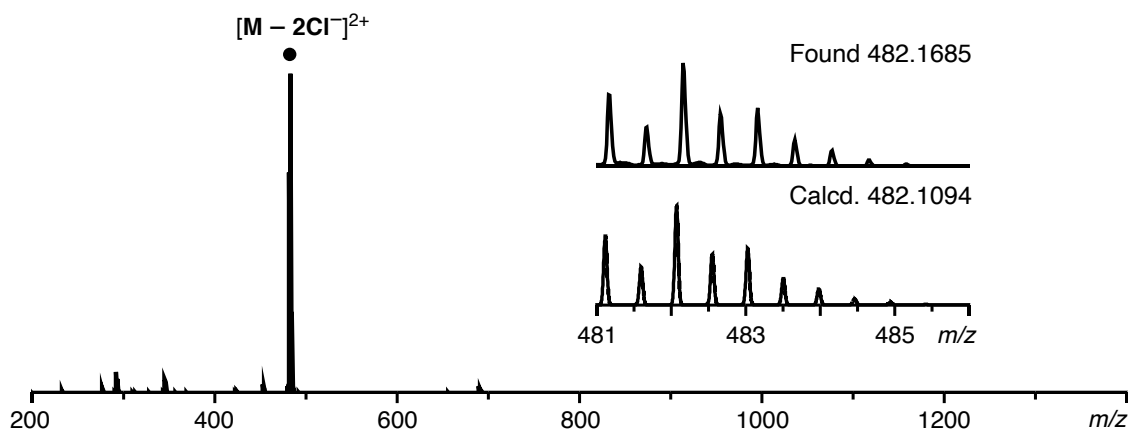

Figure S48. ESI-TOF MS spectrum (CH<sub>3</sub>OH/CH<sub>3</sub>CN) of NdpP1.



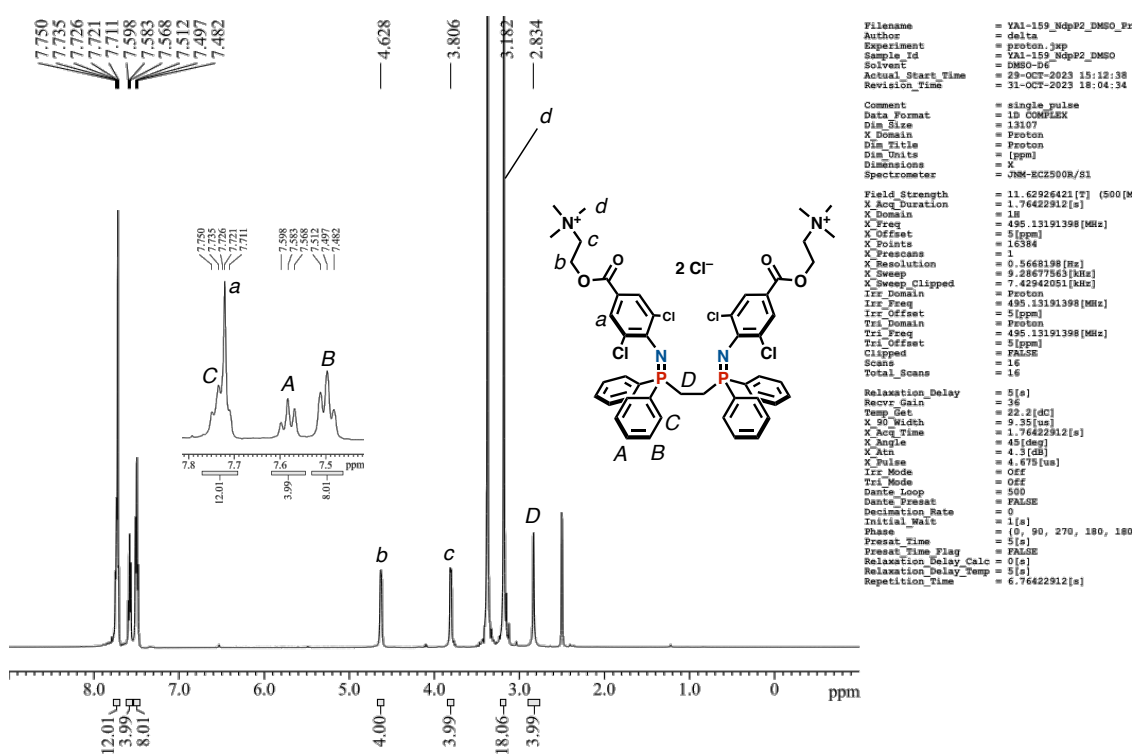

Figure S49.  $^1\text{H}$  NMR spectrum (500 MHz,  $\text{DMSO}-d_6$ , 298 K) of NdpP2.

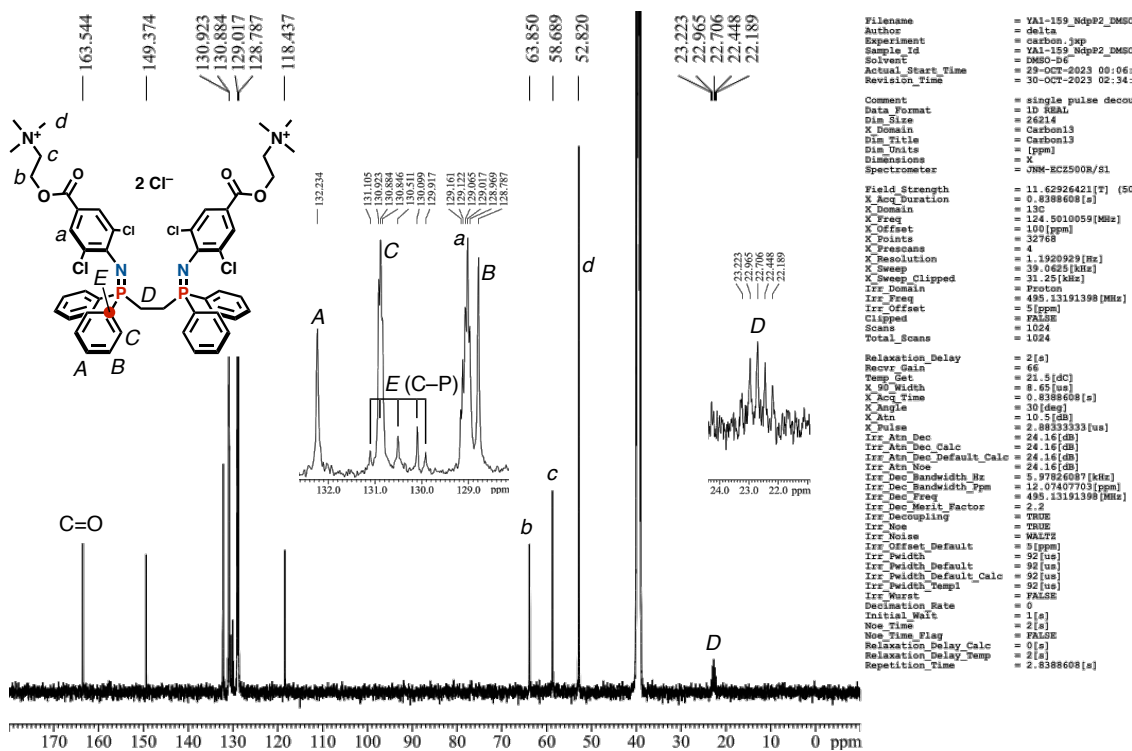

Figure S50.  $^{13}\text{C}$  NMR spectrum (125 MHz,  $\text{DMSO}-d_6$ , 298 K) of NdpP2.



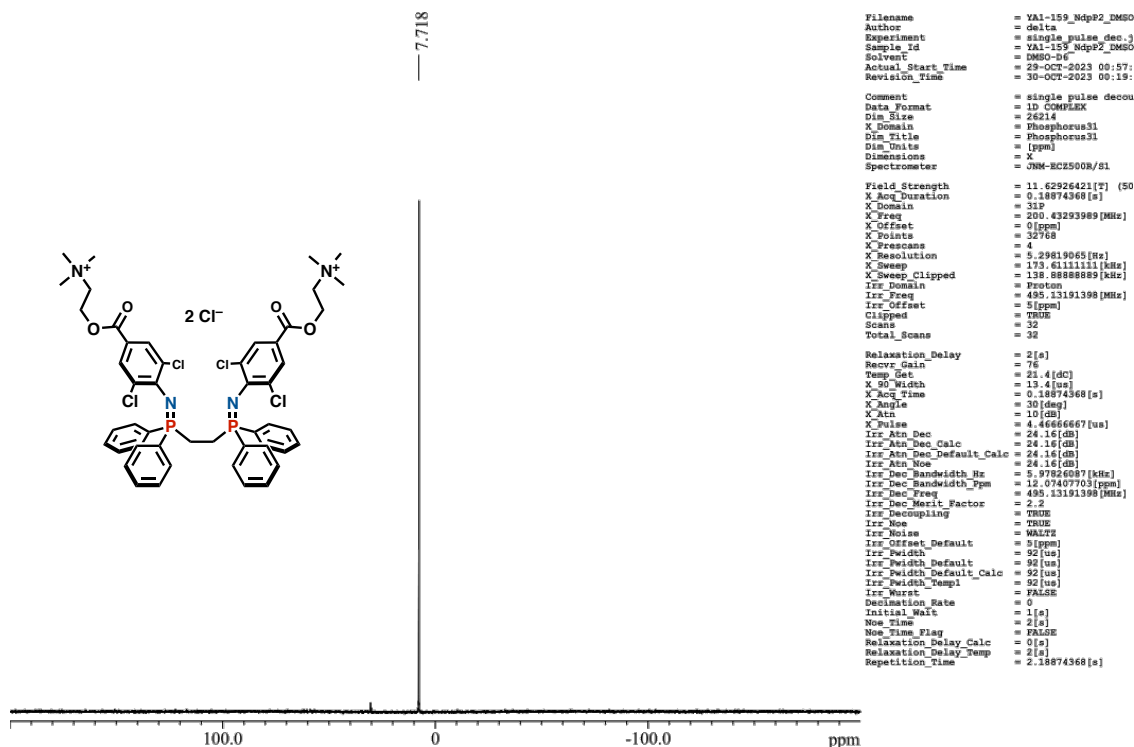

Figure S51.  $^{31}\text{P}$  NMR spectrum (202 MHz,  $\text{DMSO-}d_6$ , 298 K) of NdpP2.

## Display Report

### Analysis Info

Analysis Name D:\Data\ofcbunsek\irai\2023\toyota\_lab\yamashina\231019\NdpP2-000001.d  
 Method esi\_posi\_low.m  
 Sample Name NdpP2-  
 Comment

Acquisition Date 2023/10/19 9:57:22

Operator BDAL@DE  
 Instrument micrOTOF 213750.10321

### Acquisition Parameter

|             |            |                      |          |                  |           |
|-------------|------------|----------------------|----------|------------------|-----------|
| Source Type | ESI        | Ion Polarity         | Positive | Set Nebulizer    | 0.3 Bar   |
| Focus       | Not active |                      |          | Set Dry Heater   | 180 °C    |
| Scan Begin  | 50 m/z     | Set Capillary        | 4500 V   | Set Dry Gas      | 4.0 l/min |
| Scan End    | 1500 m/z   | Set End Plate Offset | -500 V   | Set Divert Valve | Waste     |

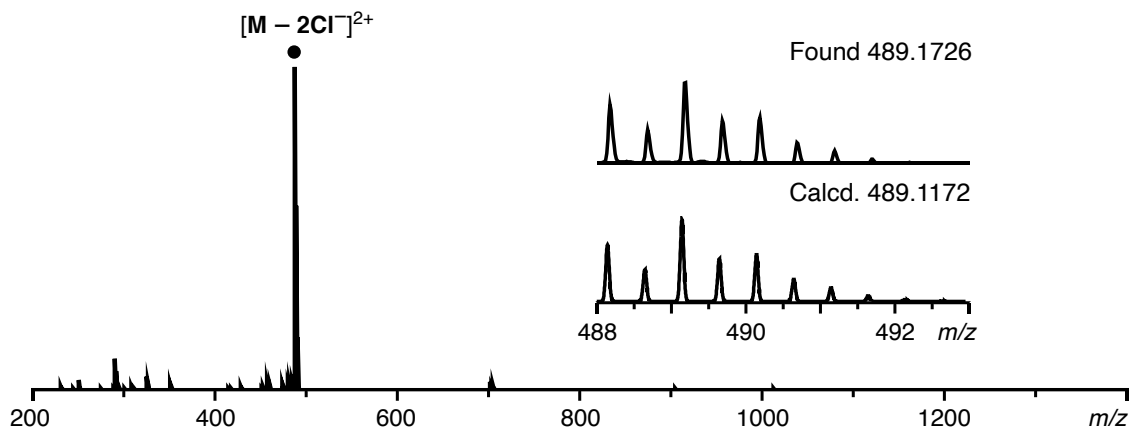

Figure S52. ESI-TOF MS spectrum ( $\text{CH}_3\text{OH}/\text{CH}_3\text{CN}$ ) of NdpP2.

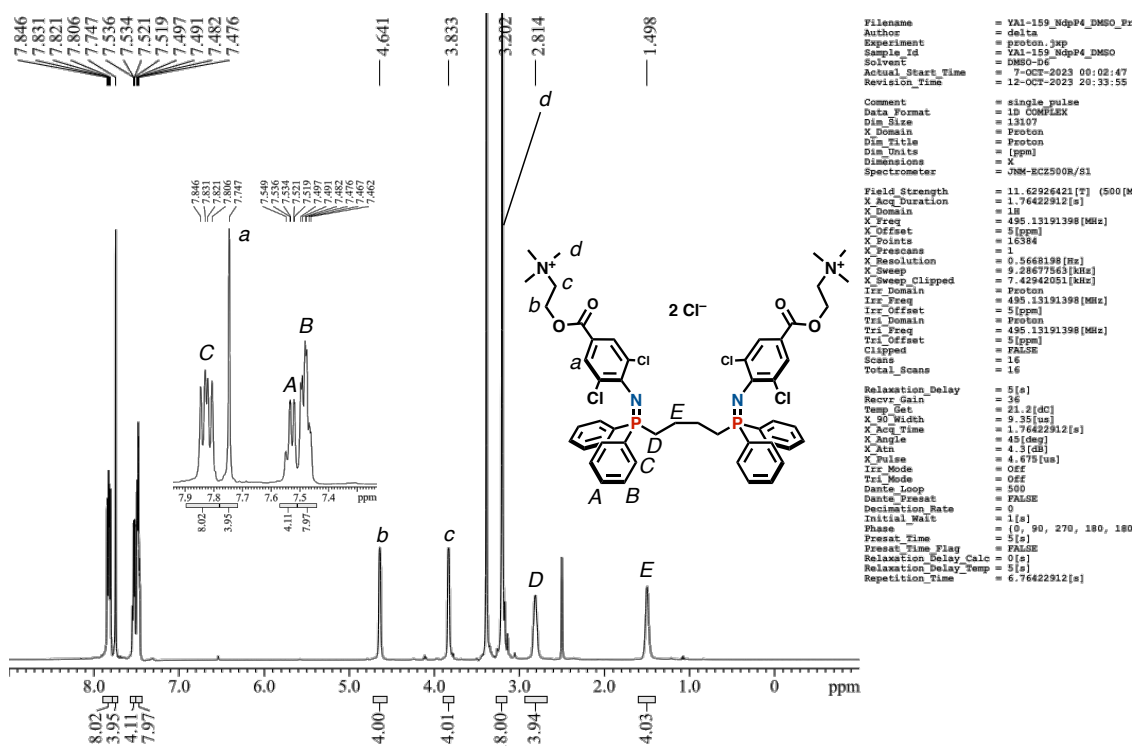

Figure S53.  $^1\text{H}$  NMR spectrum (500 MHz, DMSO- $d_6$ , 298 K) of NdpP4.

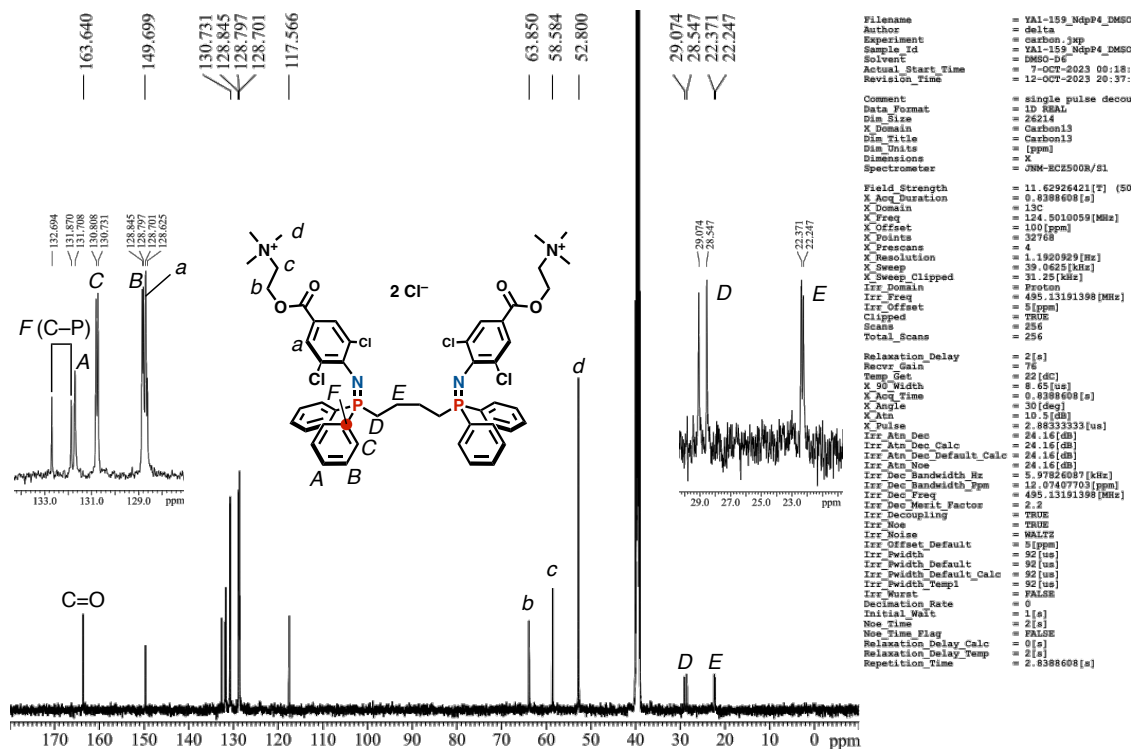

Figure S54.  $^{13}\text{C}$  NMR spectrum (125 MHz, DMSO- $d_6$ , 298 K) of NdpP4.

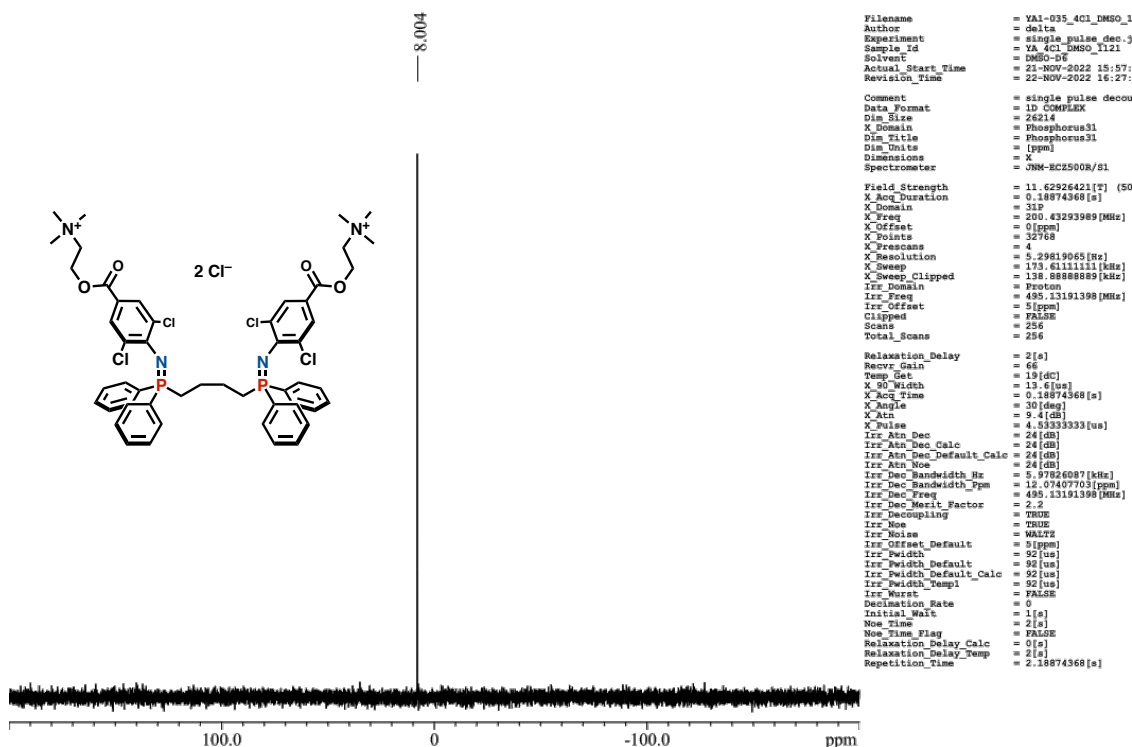

Figure S55.  $^{31}\text{P}$  NMR spectrum (202 MHz,  $\text{DMSO-}d_6$ , 298 K) of NdpP4.

## Display Report

|                              |                                                                          |                                      |                       |
|------------------------------|--------------------------------------------------------------------------|--------------------------------------|-----------------------|
| <b>Analysis Info</b>         |                                                                          | Acquisition Date 2023/10/19 10:23:25 |                       |
| Analysis Name                | D:\Data\ofcbunsekil\irai\2023\toyota_lab\yamashina\231019\NdpP4-000001.d | Operator                             | BDAL@DE               |
| Method                       | esi_posi_low.m                                                           | Instrument                           | microTOF 213750.10321 |
| Sample Name                  | NdpP4-                                                                   |                                      |                       |
| Comment                      |                                                                          |                                      |                       |
| <b>Acquisition Parameter</b> |                                                                          |                                      |                       |
| Source Type                  | ESI                                                                      | Ion Polarity                         | Positive              |
| Focus                        | Not active                                                               | Set Nebulizer                        | 0.3 Bar               |
| Scan Begin                   | 50 m/z                                                                   | Set Dry Heater                       | 180 °C                |
| Scan End                     | 1500 m/z                                                                 | Set Dry Gas                          | 4.0 l/min             |
|                              |                                                                          | Set End Plate Offset                 | -500 V                |
|                              |                                                                          | Set Divert Valve                     | Waste                 |

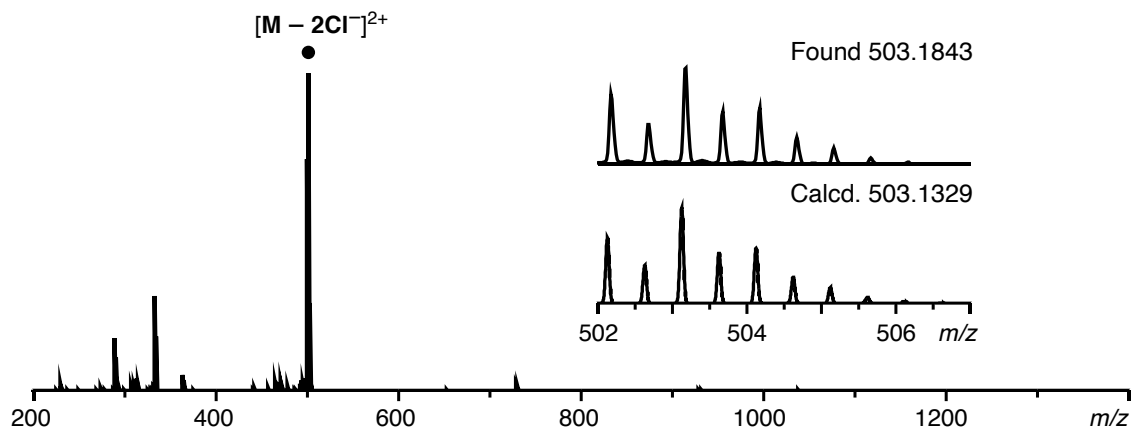

Figure S56. ESI-TOF MS spectrum ( $\text{CH}_3\text{OH}/\text{CH}_3\text{CN}$ ) of NdpP4.

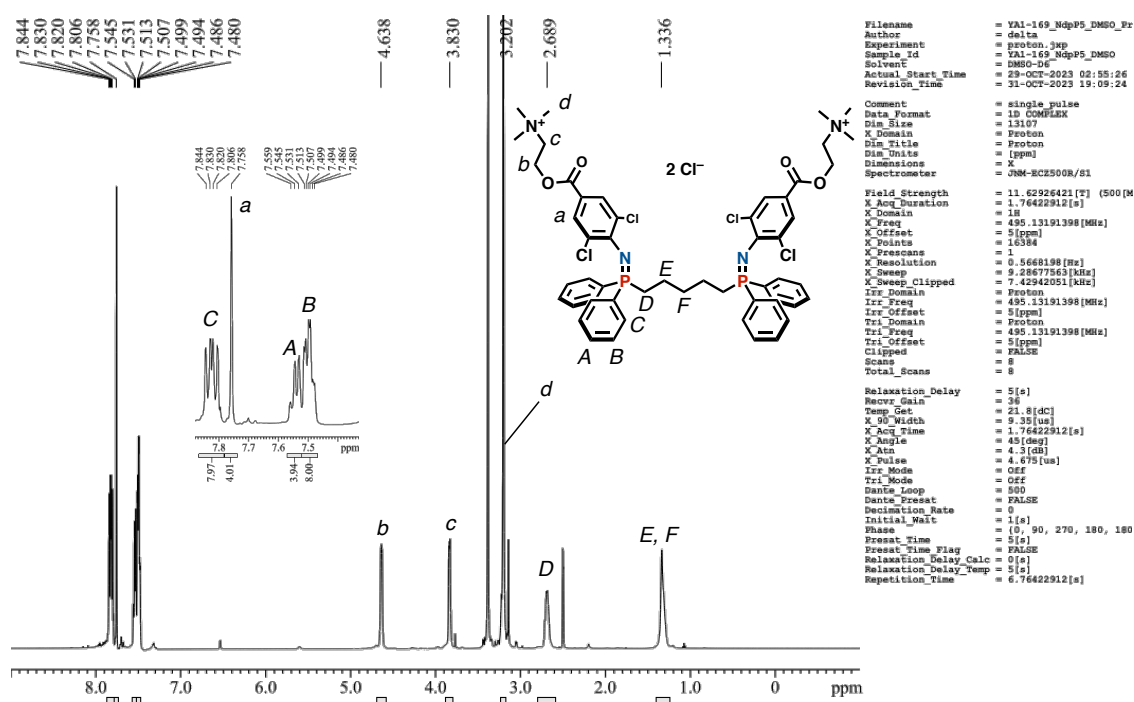

Figure S57.  $^1\text{H}$  NMR spectrum (500 MHz,  $\text{DMSO}-d_6$ , 298 K) of NdpP5.

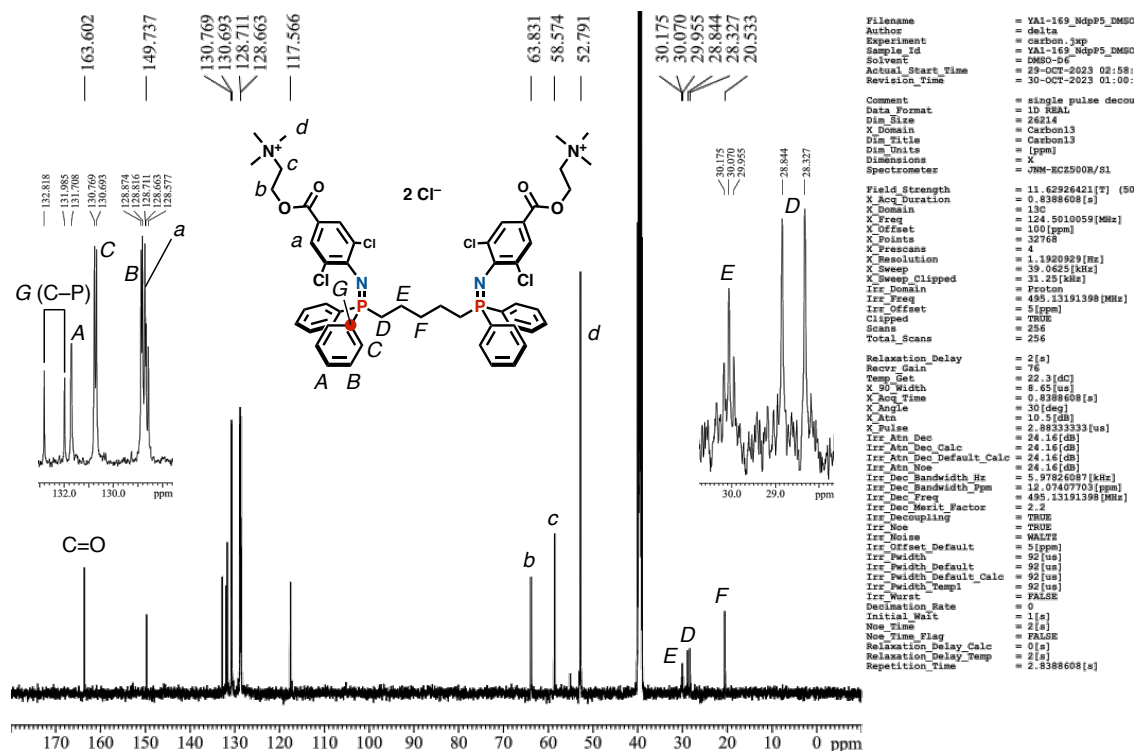

Figure S58.  $^{13}\text{C}$  NMR spectrum (125 MHz,  $\text{DMSO}-d_6$ , 298 K) of NdpP5.

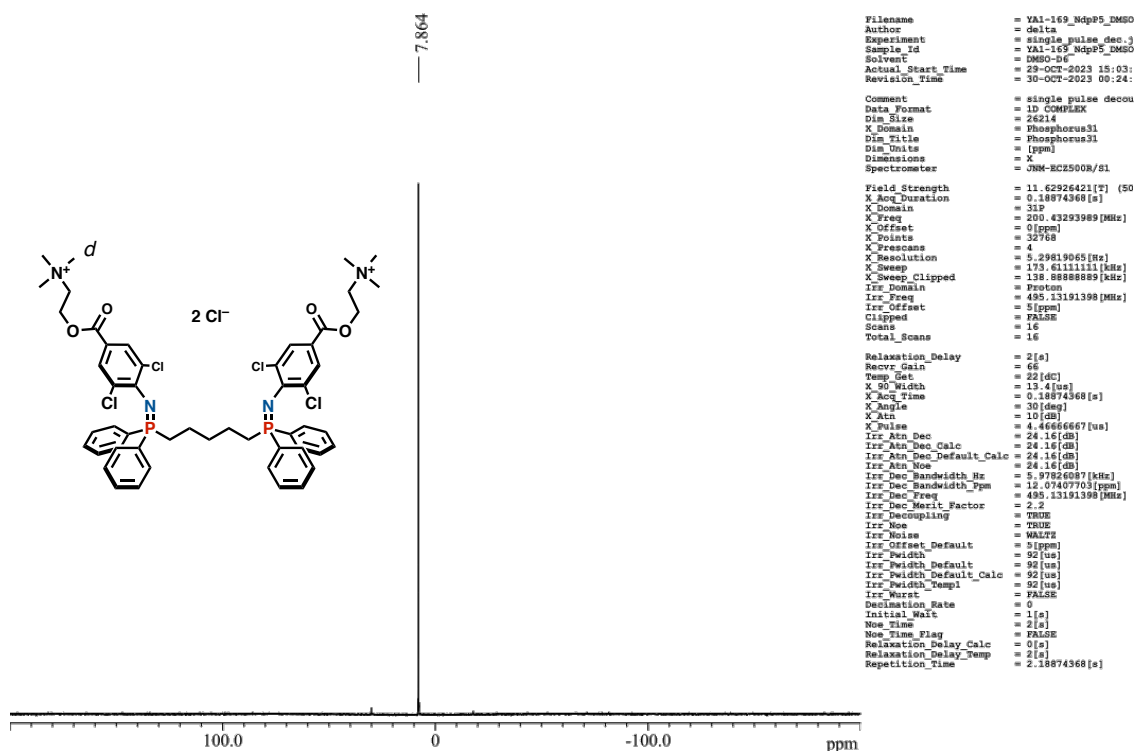

Figure S59.  $^{31}\text{P}$  NMR spectrum (202 MHz,  $\text{DMSO-}d_6$ , 298 K) of NdpP5.

## Display Report

### Analysis Info

Analysis Name D:\Data\ofcbunseki\irai\2023\toyota\_lab\yamashina\231019\NdpP5-000001.d  
 Method esi\_posi\_low.m  
 Sample Name NdpP5-  
 Comment

Acquisition Date 2023/10/19 10:32:59  
 Operator BDAL@DE  
 Instrument micrOTOF 213750.10321

### Acquisition Parameter

|             |            |                      |          |                  |           |
|-------------|------------|----------------------|----------|------------------|-----------|
| Source Type | ESI        | Ion Polarity         | Positive | Set Nebulizer    | 0.3 Bar   |
| Focus       | Not active |                      |          | Set Dry Heater   | 180 °C    |
| Scan Begin  | 50 m/z     | Set Capillary        | 4500 V   | Set Dry Gas      | 4.0 l/min |
| Scan End    | 1500 m/z   | Set End Plate Offset | -500 V   | Set Divert Valve | Waste     |

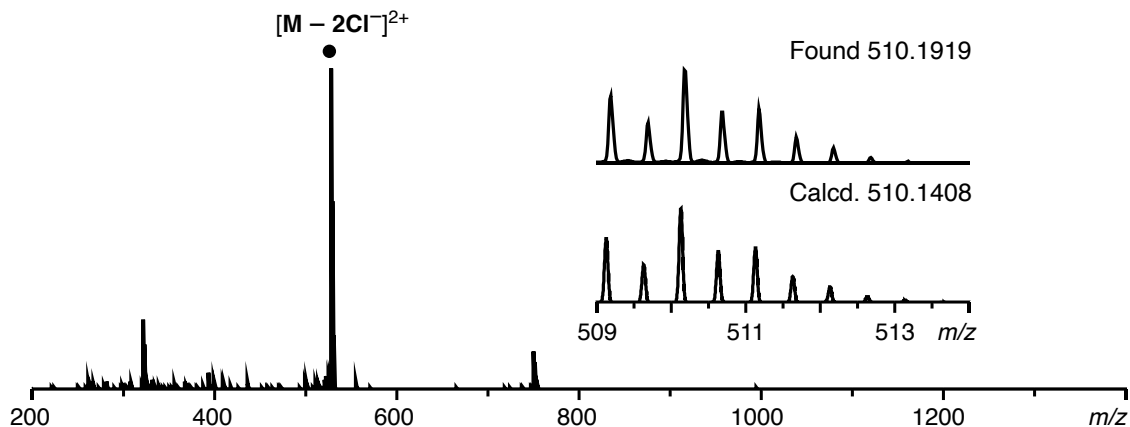

Figure S60. ESI-TOF MS spectrum ( $\text{CH}_3\text{OH}/\text{CH}_3\text{CN}$ ) of NdpP5.

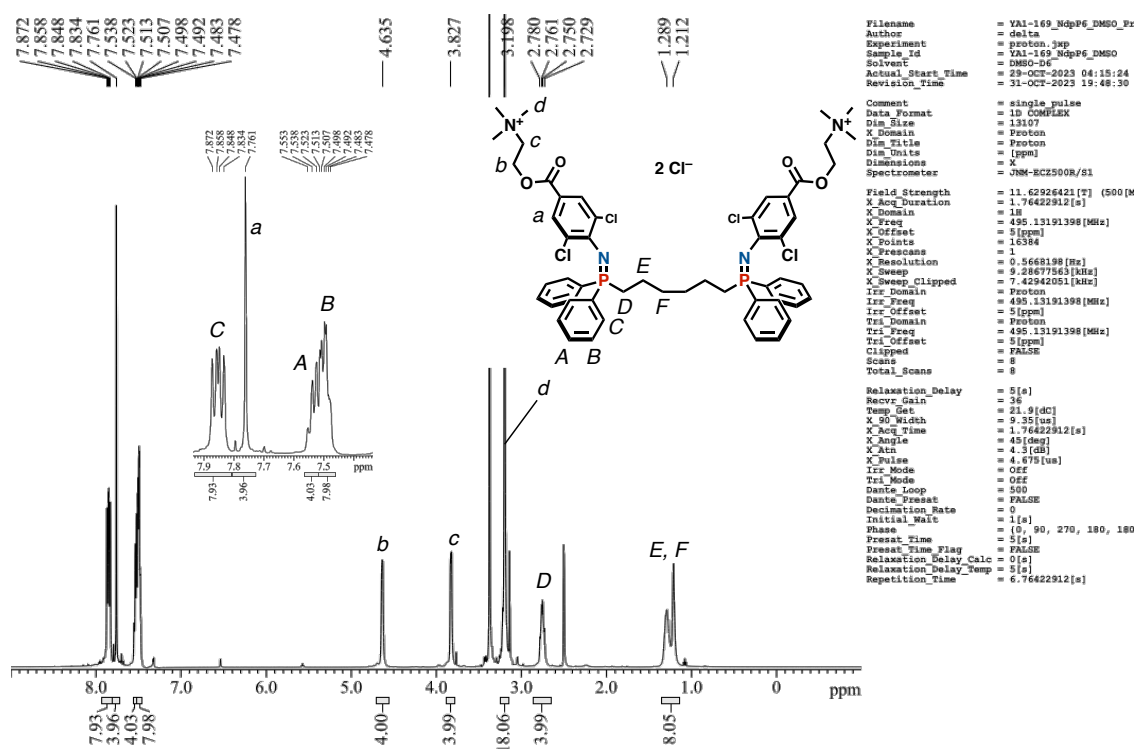

Figure S61.  $^1\text{H}$  NMR spectrum (500 MHz,  $\text{DMSO-}d_6$ , 298 K) of NdpP6.

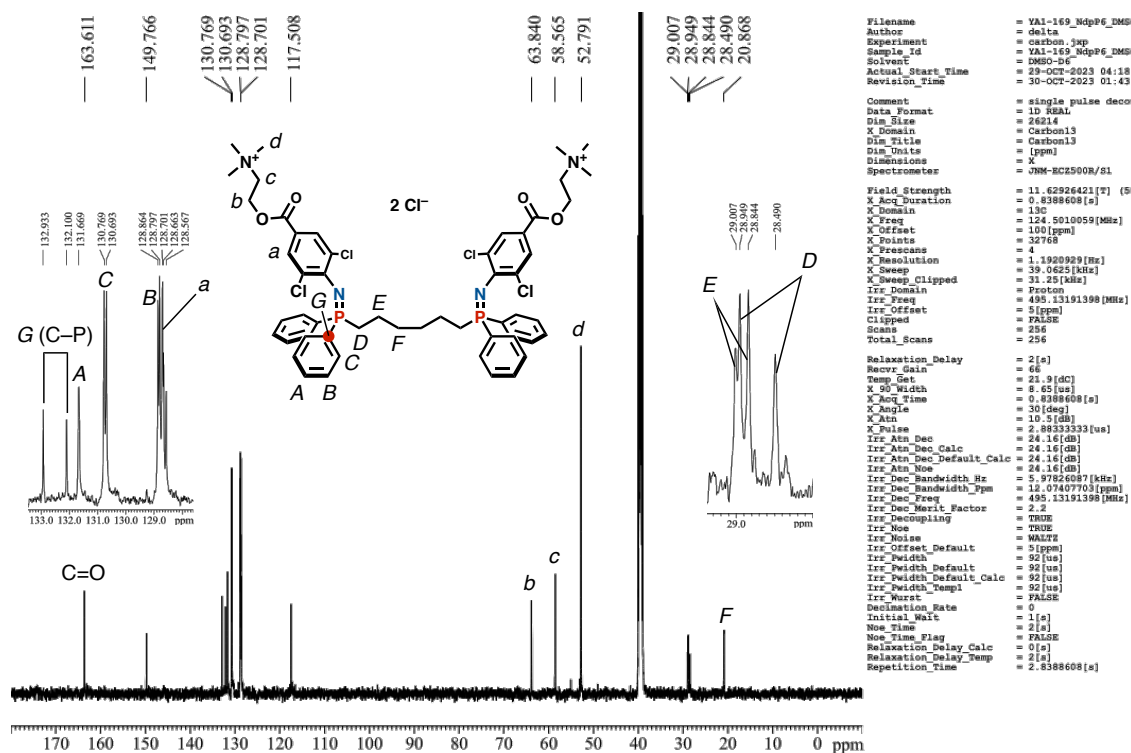

Figure S62.  $^{13}\text{C}$  NMR spectrum (125 MHz,  $\text{DMSO-}d_6$ , 298 K) of NdpP6.

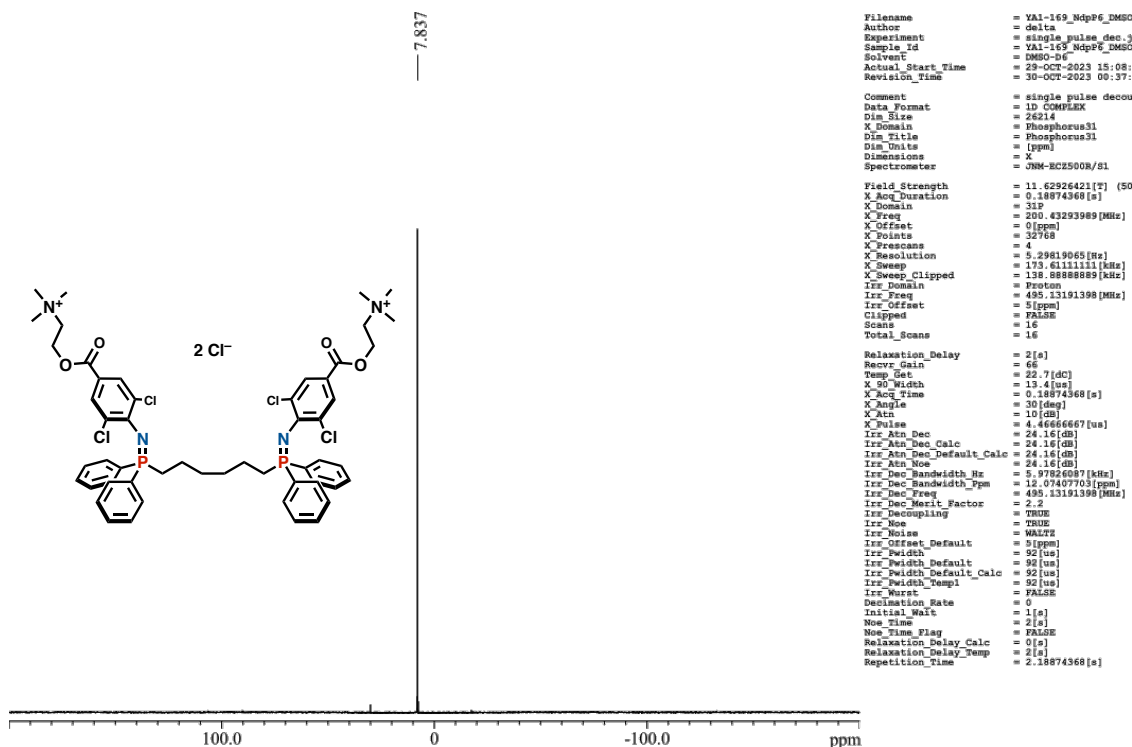

Figure S63. <sup>31</sup>P NMR spectrum (202 MHz, DMSO-*d*<sub>6</sub>, 298 K) of NdpP6.

## Display Report

|                              |                                                                          |                      |          |                     |              |
|------------------------------|--------------------------------------------------------------------------|----------------------|----------|---------------------|--------------|
| Analysis Info                |                                                                          | Acquisition Date     |          | 2023/10/19 10:47:12 |              |
| Analysis Name                | D:\Data\ofcbunsekil\irai\2023\toyota_lab\yamashina\231019\NdpP6-000001.d |                      |          |                     |              |
| Method                       | esi_posi_low.m                                                           |                      |          | Operator            | BDAL@DE      |
| Sample Name                  | NdpP6-                                                                   |                      |          | Instrument          | micrOTOF     |
| Comment                      |                                                                          |                      |          |                     | 213750.10321 |
| <b>Acquisition Parameter</b> |                                                                          |                      |          |                     |              |
| Source Type                  | ESI                                                                      | Ion Polarity         | Positive | Set Nebulizer       | 0.3 Bar      |
| Focus                        | Not active                                                               |                      |          | Set Dry Heater      | 180 °C       |
| Scan Begin                   | 50 m/z                                                                   | Set Capillary        | 4500 V   | Set Dry Gas         | 4.0 l/min    |
| Scan End                     | 1500 m/z                                                                 | Set End Plate Offset | -500 V   | Set Divert Valve    | Waste        |

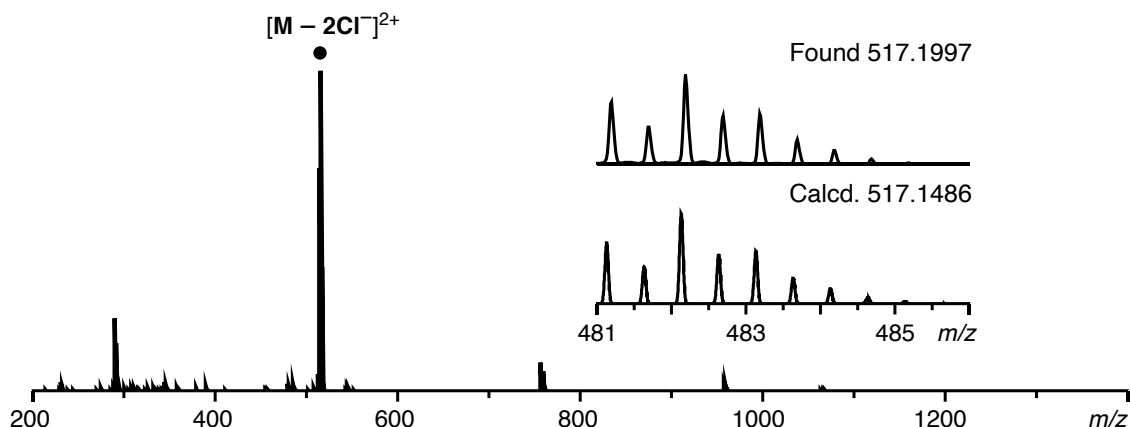

Figure S64. ESI-TOF MS spectrum (CH<sub>3</sub>OH/CH<sub>3</sub>CN) of NdpP6.

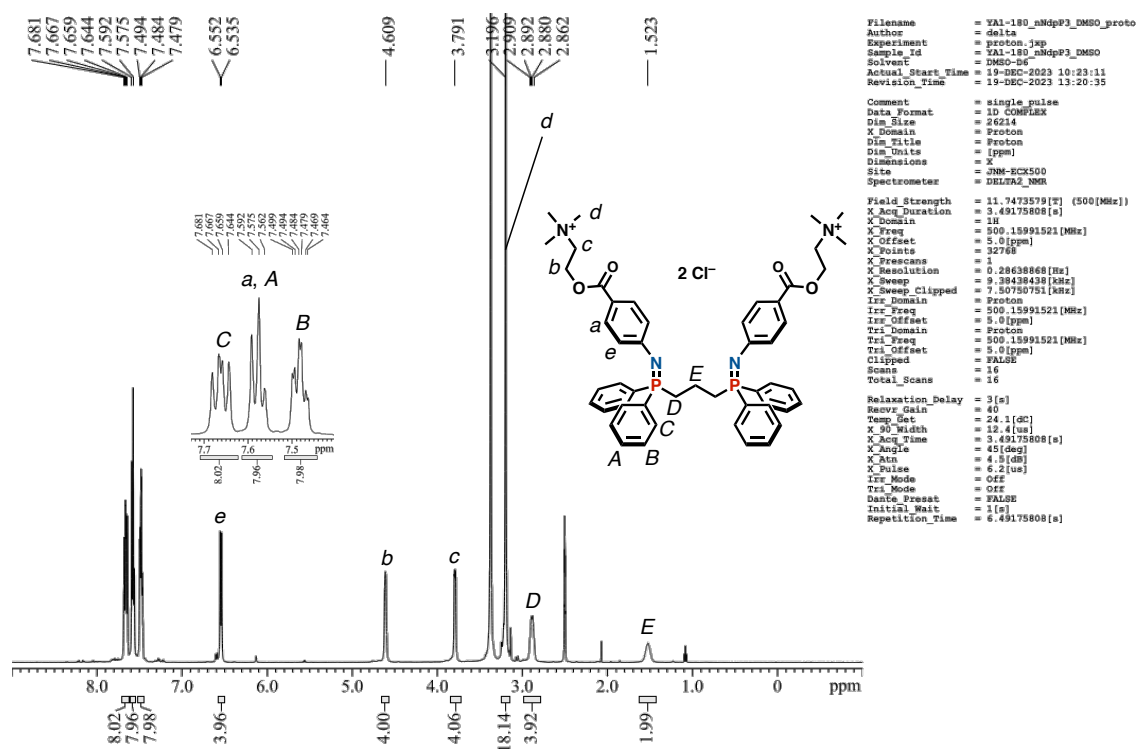

Figure S65.  $^1\text{H}$  NMR spectrum (500 MHz,  $\text{DMSO}-d_6$ , 298 K) of  $\text{nNdpP3}$ .

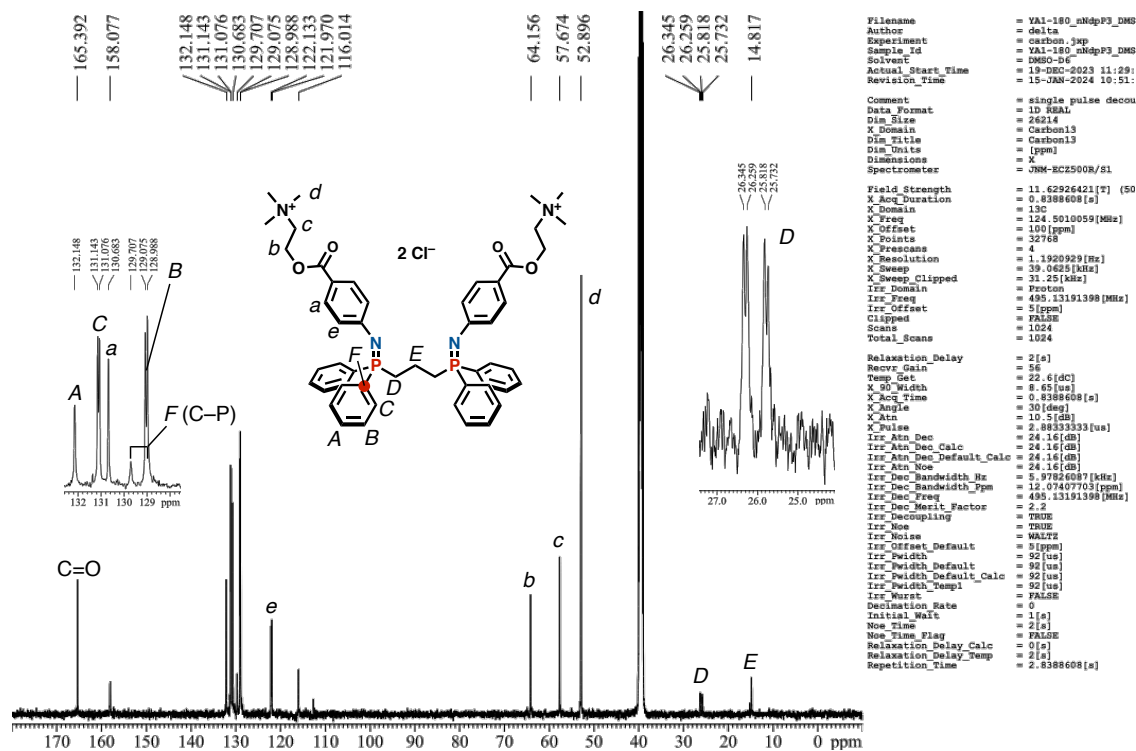

Figure S66.  $^{13}\text{C}$  NMR spectrum (125 MHz,  $\text{DMSO}-d_6$ , 298 K) of  $\text{nNdpP3}$ .



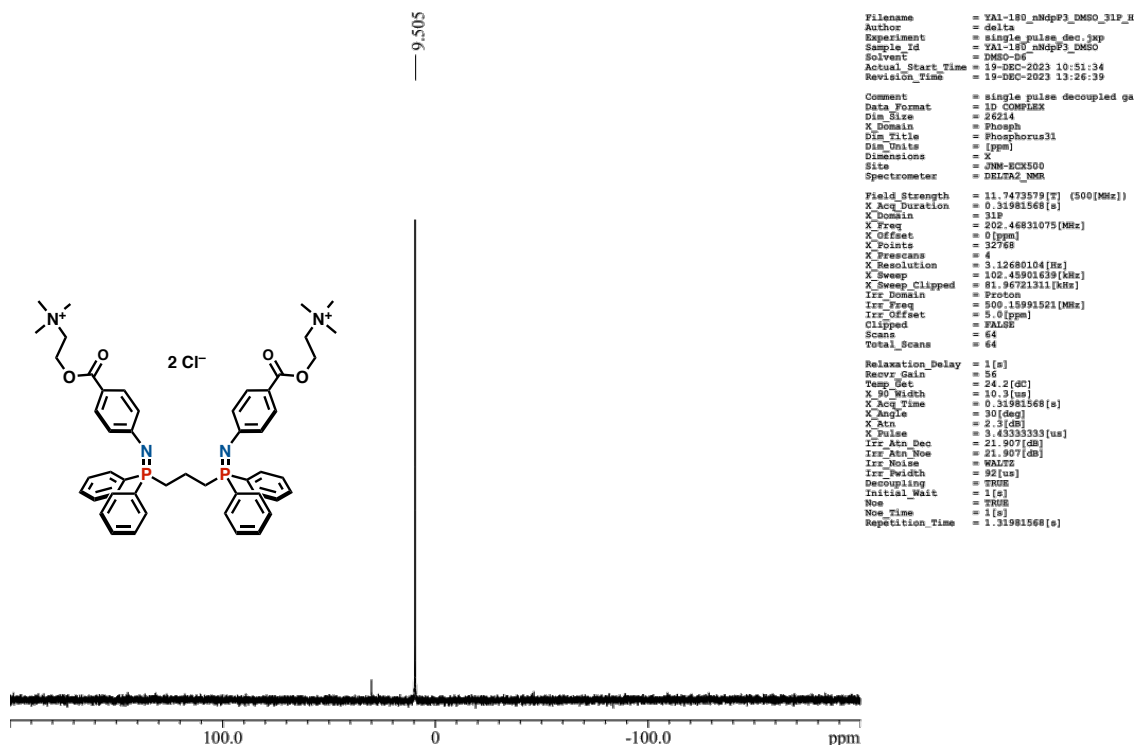

Figure S67. <sup>31</sup>P NMR spectrum (202 MHz, DMSO-*d*<sub>6</sub>, 298 K) of nNdpP3.

## TDCMAS ESI-TOF

|                              |                                                                          |                                     |                    |
|------------------------------|--------------------------------------------------------------------------|-------------------------------------|--------------------|
| <b>Analysis Info</b>         |                                                                          | Acquisition Date 2024/01/18 9:43:54 |                    |
| Analysis Name                | D:\Data\ofcbunsekil\irail\2023\toyota_lab\akiyama\240119\nNdpP3-000001.d | Operator                            | BDAL@DE            |
| Method                       | esi_posi_low.m                                                           | Instrument / Ser#                   | microTOF 213750.10 |
| Sample Name                  | nNdpP3-                                                                  |                                     | 321                |
| Comment                      |                                                                          |                                     |                    |
| <b>Acquisition Parameter</b> |                                                                          |                                     |                    |
| Source Type                  | ESI                                                                      | Ion Polarity                        | Positive           |
| Focus                        | Not active                                                               | Set Nebulizer                       | 0.3 Bar            |
| Scan Begin                   | 50 m/z                                                                   | Set Dry Heater                      | 180 °C             |
| Scan End                     | 1300 m/z                                                                 | Set Capillary                       | 4500 V             |
|                              |                                                                          | Set End Plate Offset                | -500 V             |
|                              |                                                                          | Set Dry Gas                         | 4.0 l/min          |
|                              |                                                                          | Set Divert Valve                    | Waste              |

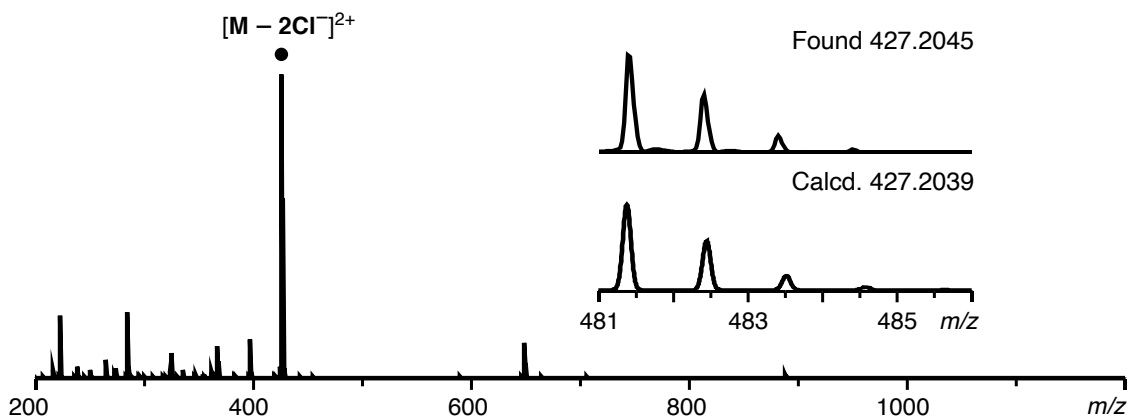

Figure S68. ESI-TOF MS spectrum (CH<sub>3</sub>OH/CH<sub>3</sub>CN) of nNdpP3.

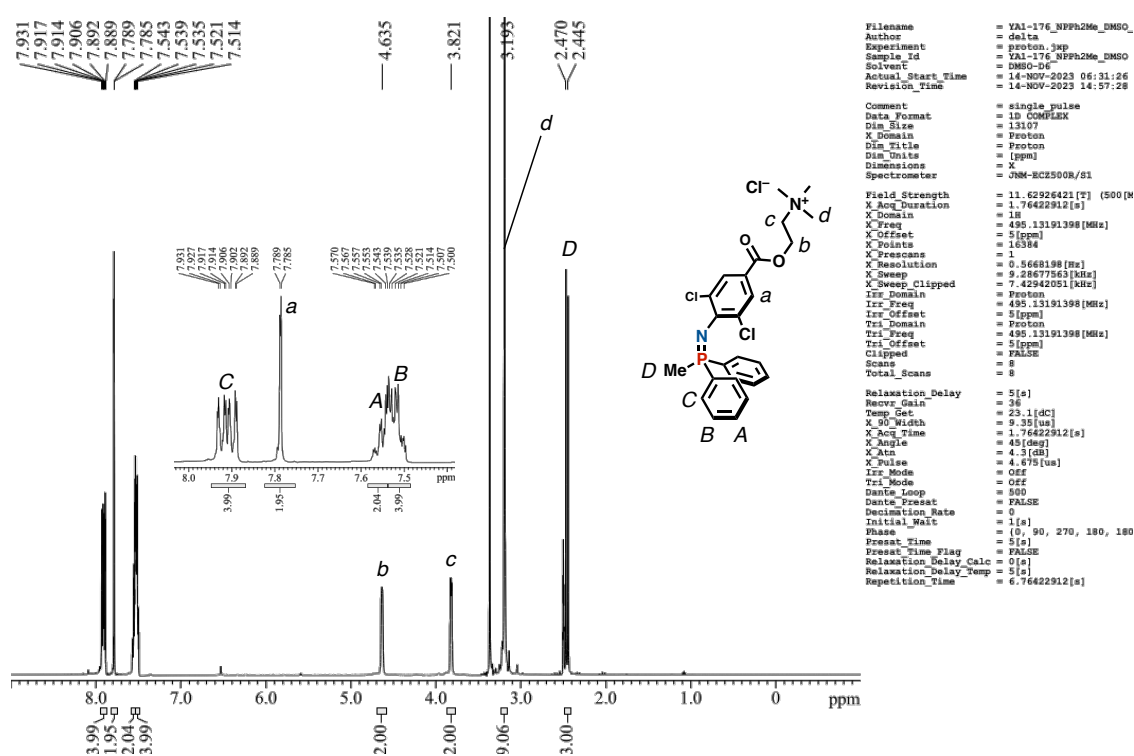

Figure S69. <sup>1</sup>H NMR spectrum (500 MHz, DMSO-*d*<sub>6</sub>, 298 K) of NPPH2Me.

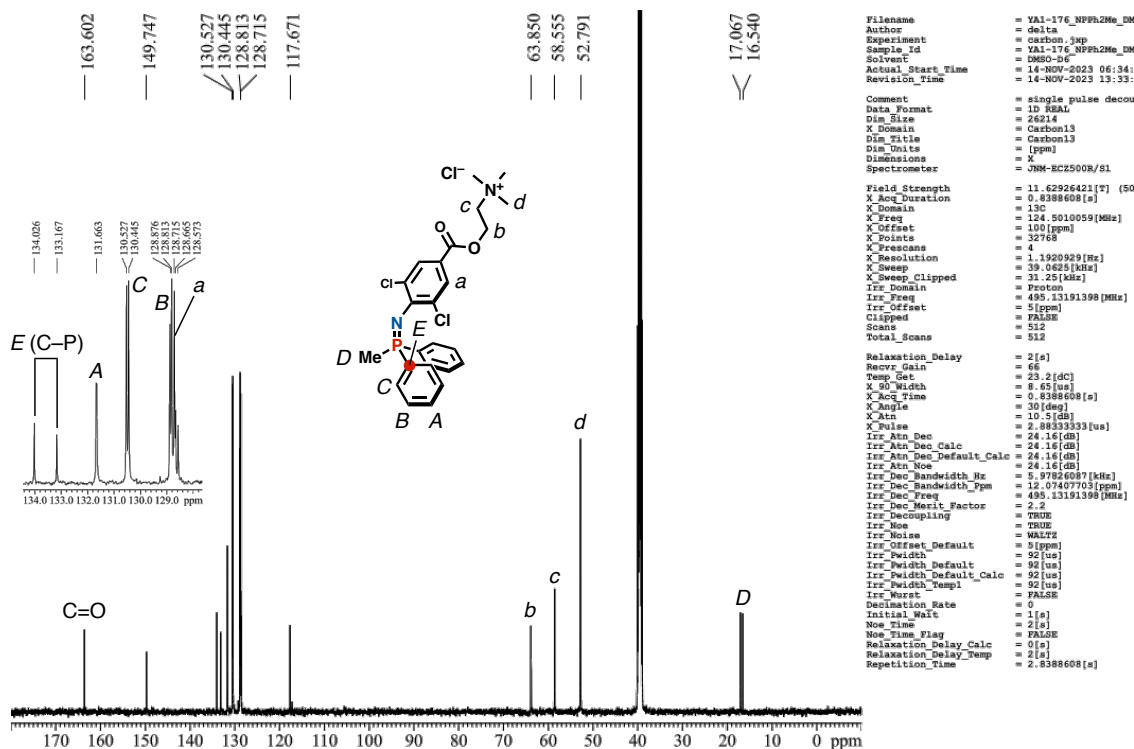

Figure S70. <sup>13</sup>C NMR spectrum (125 MHz, DMSO-*d*<sub>6</sub>, 298 K) of NPPH2Me.

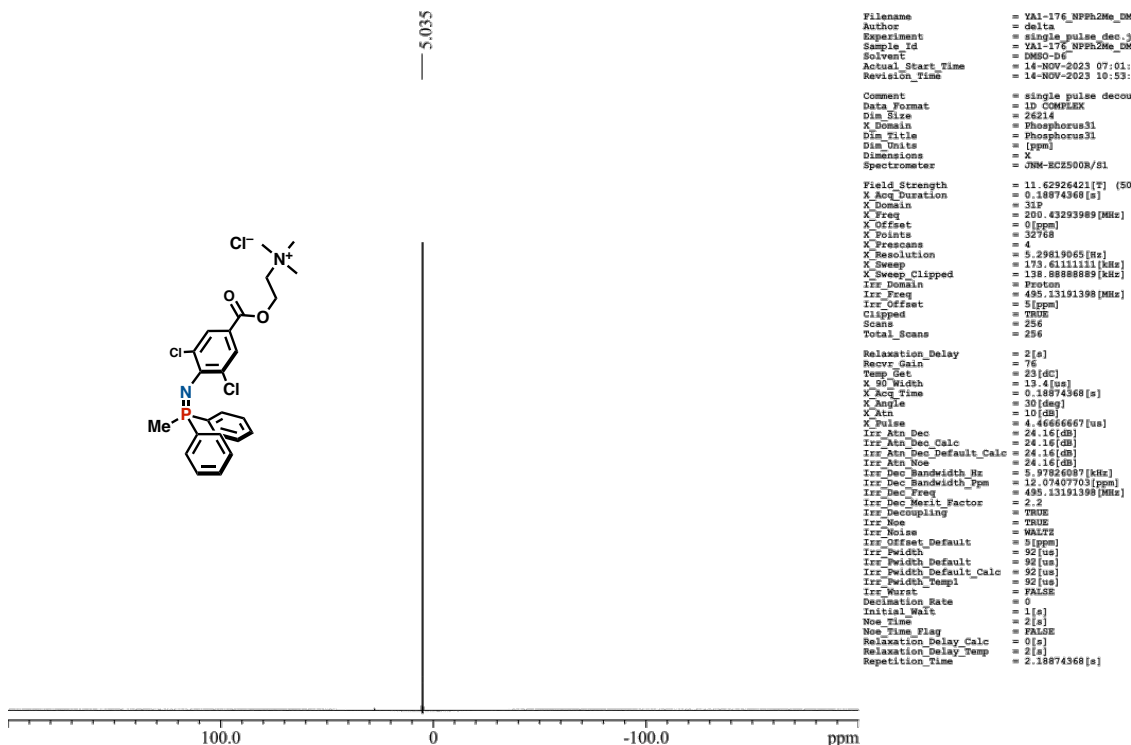

**Figure S71.**  $^{31}\text{P}$  NMR spectrum (202 MHz,  $\text{DMSO-}d_6$ , 298 K) of NPPH2Me.

## TDCMAS ESI-TOF

|                              |                                                                        |                      |          |                    |           |
|------------------------------|------------------------------------------------------------------------|----------------------|----------|--------------------|-----------|
| <b>Analysis Info</b>         |                                                                        | Acquisition Date     |          | 2024/01/18 9:59:25 |           |
| Analysis Name                | D:\Data\ofcbunsek\irai\2023\toyota_lab\akiyama\240119\NPPH2Me-000001.d | Operator             | BDAL@DE  |                    |           |
| Method                       | esi_posi_low.m                                                         | Instrument / Ser#    | microTOF | 213750.10          |           |
| Sample Name                  | NPPH2Me-                                                               |                      |          | 321                |           |
| Comment                      |                                                                        |                      |          |                    |           |
| <b>Acquisition Parameter</b> |                                                                        |                      |          |                    |           |
| Source Type                  | ESI                                                                    | Ion Polarity         | Positive | Set Nebulizer      | 0.3 Bar   |
| Focus                        | Not active                                                             |                      |          | Set Dry Heater     | 180 °C    |
| Scan Begin                   | 50 m/z                                                                 | Set Capillary        | 4500 V   | Set Dry Gas        | 4.0 l/min |
| Scan End                     | 1300 m/z                                                               | Set End Plate Offset | -500 V   | Set Divert Valve   | Waste     |

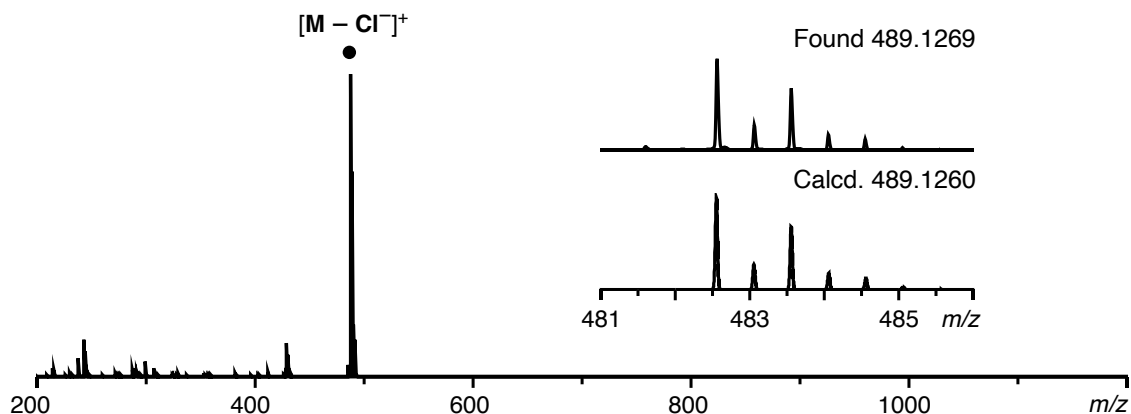

Supplement: d4sm00789a1.pdf [file d4sm00789a1.pdf]
